# Supplementary material for: HCMV exploits STING signaling and counteracts IFN and ISG induction to facilitate dendritic cell infection
Source: Research Square preprint supplement (doi:10.21203/rs.3.rs-953016/v1), 2022-01-13
Supplement: Supplementary file 1 [file 377142d180189895f112c4fa.xlsx]

## Sheet: S2
Supplementary Table 2: Single cell summary statistics for highly variable genes in Figure 5B. Values are the log2 fold changes of HCMV treated vs. mock treated cells and Bystanders (B) vs. productively infected cells, as well as Spearman's ρ vs. total % of viral gene expression (together with multiple testing corrected p values estimated using the asymptotic t test) for Bystanders or productively…
Gene	logFC HCMV vs. Mock	logFC P vs. B	Spearman's ρ (B)	Spearman's FDR (B)	Spearman's ρ (P)	Spearman's FDR (P)	HALLMARK_ADIPOGENESIS	HALLMARK_ALLOGRAFT_REJECTION	HALLMARK_ANDROGEN_RESPONSE	HALLMARK_ANGIOGENESIS	HALLMARK_APICAL_JUNCTION	HALLMARK_APICAL_SURFACE	HALLMARK_APOPTOSIS	HALLMARK_BILE_ACID_METABOLISM	HALLMARK_CHOLESTEROL_HOMEOSTASIS	HALLMARK_COAGULATION	HALLMARK_COMPLEMENT	HALLMARK_DNA_REPAIR	HALLMARK_E2F_TARGETS	HALLMARK_EPITHELIAL_MESENCHYMAL_TRANSITION	HALLMARK_ESTROGEN_RESPONSE_EARLY	HALLMARK_ESTROGEN_RESPONSE_LATE	HALLMARK_FATTY_ACID_METABOLISM	HALLMARK_G2M_CHECKPOINT	HALLMARK_GLYCOLYSIS	HALLMARK_HEDGEHOG_SIGNALING	HALLMARK_HEME_METABOLISM	HALLMARK_HYPOXIA	HALLMARK_IL2_STAT5_SIGNALING	HALLMARK_IL6_JAK_STAT3_SIGNALING	HALLMARK_INFLAMMATORY_RESPONSE	HALLMARK_INTERFERON_ALPHA_RESPONSE	HALLMARK_INTERFERON_GAMMA_RESPONSE	HALLMARK_KRAS_SIGNALING_DN	HALLMARK_KRAS_SIGNALING_UP	HALLMARK_MITOTIC_SPINDLE	HALLMARK_MTORC1_SIGNALING	HALLMARK_MYC_TARGETS_V1	HALLMARK_MYC_TARGETS_V2	HALLMARK_MYOGENESIS	HALLMARK_NOTCH_SIGNALING	HALLMARK_OXIDATIVE_PHOSPHORYLATION	HALLMARK_P53_PATHWAY	HALLMARK_PANCREAS_BETA_CELLS	HALLMARK_PEROXISOME	HALLMARK_PI3K_AKT_MTOR_SIGNALING	HALLMARK_PROTEIN_SECRETION	HALLMARK_REACTIVE_OXYGEN_SPECIES_PATHWAY	HALLMARK_SPERMATOGENESIS
CD3G	0.182115	3.1997e-07	0.00469588	0.672221	-0.0277344	0.4112		x
PDE11A	0.751273	3.1997e-07	-0.0112994	0.282278	-0.035612	0.275391
CRIP3	-1.80212	1.05018e-05	-0.00477691	0.66651	0.0194011	0.583325
CST2	-0.339251	1.05018e-05	-0.0164642	0.107494	0.00670574	0.862118
KCNJ12	0.413758	1.05018e-05	0.0153929	0.134605	0.0438803	0.165766
KIAA1755	-0.527383	1.05018e-05	-0.0118455	0.258472	-0.0353516	0.279415
PBOV1	0.40976	1.05018e-05	0.00792934	0.462218	-0.0344402	0.293206
TMEM133	0.509898	1.05018e-05	0.007724	0.474674	0.0107422	0.77425
CHI3L2	0.919672	2.08427e-05	-0.0998389	1.62951e-26	-0.0951995	0.00097173
PNOC	-0.560313	3.53706e-05	-0.00201815	0.859033	-0.00494793	0.89863
FOXD4L1	1.14497	4.58723e-05	0.0052675	0.634057	-0.050473	0.105758
C7orf34	-1.54835	-4.94176e-05	-0.0181656	0.0730448	-0.0383464	0.235467
HIST1H2BO	0.230561	-4.94176e-05	0.0299692	0.00215906	-0.0177084	0.620833
LRRIQ4	0.300315	-4.94176e-05	-0.0210376	0.0357338	0.0447917	0.155852
SAMD5	0.301486	-4.94176e-05	0.0243813	0.0138713	0.0119141	0.747526
ITK	0.422207	-5.95994e-05	0.00750241	0.489607	-0.0167969	0.64038		x
CXCR6	0.341248	7.04211e-05	-0.0160228	0.118273	-0.0138672	0.707581																									x
SYNJ2BP-COX16	0.181433	7.21349e-05	-0.0181234	0.0737137	0.0462283	0.141748
SORCS2	0.853255	-7.39664e-05	0.0390868	4.90749e-05	0.0170853	0.634394
IL12B	1.79172	7.98198e-05	0.0278215	0.00458828	-0.0195641	0.579868		x																							x			x
RAPGEF4	0.387369	8.09229e-05	0.017738	0.0805782	0.0131248	0.723344
ACKR1	0.360228	-8.44682e-05	0.0138714	0.180763	0.0360027	0.269426																					x
IFNA21	1.28516	9.51128e-05	0.0309953	0.00147597	-0.019702	0.577159
POU2AF1	-0.339088	9.52899e-05	0.0164459	0.107903	0.0451824	0.152247
HTR2B	-0.020365	-0.000109337	0.00595555	0.588424	-0.0157552	0.663084
PRRT1	-0.550505	-0.000109337	-0.00492309	0.657889	-0.014974	0.681765
SLC5A10	0.817444	-0.000109337	0.00310441	0.78151	-0.0365235	0.261061
JCHAIN	-0.114846	-0.000117084	-0.014729	0.153668	-0.0411459	0.197587
KCNK10	1.044	0.000121553	0.00515486	0.641564	0.0387758	0.22935
MUCL1	-0.768674	-0.000124613	-0.0285949	0.00351736	-0.0322008	0.329517
FBLN7	0.012469	0.00013034	-0.00187619	0.869578	0.0382813	0.235925
SLX1B	-0.958931	0.00013034	0.00474277	0.669083	0.022461	0.519389
IGLON5	0.68711	0.00013066	0.0234019	0.0185448	0.0494138	0.113466
LHFPL1	1.26329	-0.000133886	0.00375138	0.738968	-0.0261575	0.44247
SKIDA1	0.825683	-0.000141296	0.0446108	3.1727e-06	-0.0140559	0.703477
TNNT3	0.386392	-0.000144388	-0.0199048	0.0479477	-0.0289714	0.387022																																		x
SLC38A1	-0.444919	-0.000146935	0.00296323	0.791697	-0.0429688	0.175454																		x
CPNE6	0.059861	-0.000154569	-0.0149993	0.145686	-0.0091797	0.808965
CNGB1	0.170857	0.000155209	-0.00206528	0.855236	-0.000520834	0.987073
EN1	0.437078	0.000155209	-0.00258434	0.819008	-0.037435	0.248232
N4BP2L1	0.806702	-0.000165533	0.087754	9.34621e-21	-0.0902718	0.00186644
FNDC11	0.18685	0.000165711	0.0106842	0.311371	0.0427823	0.177379
GALNT4	-0.752488	-0.000169256	0.0215251	0.0314457	-0.0110026	0.768509
CPXM1	0.628621	0.000187035	0.0523222	3.8594e-08	0.00361544	0.923553
HAO1	0.413324	0.00019026	0.00844301	0.431181	-0.00657553	0.863974								x
POU5F1B	0.437611	0.00019026	0.00376982	0.737665	0.0402344	0.209734
IKZF3	0.639053	0.000204113	-0.0267715	0.00651014	0.0345459	0.291599
IFNA13	1.77215	-0.000208398	0.0317188	0.00112283	0.00604352	0.875184
VPS37D	0.459639	0.000215129	0.0106642	0.312131	0.00813804	0.829522												x
IL17D	-0.0163672	0.000215129	0.0224446	0.0244642	-0.0139323	0.706145
ITM2A	0.180695	0.000215129	-0.0085837	0.42312	0.00820314	0.828205
TDRD1	-0.644262	0.000215129	0.00612929	0.577436	-0.0432944	0.171989
ADGRD2	0.0570742	-0.000229176	0.00675166	0.538151	-0.00123698	0.973199
CYP27B1	0.120893	-0.000232582	-0.0464771	1.16061e-06	-0.0454201	0.149917
C10orf105	-0.8899	0.000233905	-0.0146613	0.155574	-0.0666216	0.0267964
MMP1	0.740557	0.000235413	-0.0159426	0.120323	-0.037855	0.241855										x				x
RND3	1.61086	-0.000237908	-0.0163388	0.110472	-0.0190373	0.591829
LSAMP	0.437153	-0.000248465	0.0242033	0.014607	0.00091146	0.980629
BCL2L2-PABPN1	-0.188371	0.000250179	0.0102921	0.330883	-0.0126953	0.731379
FAAH2	-0.295043	0.000250179	-0.00358712	0.748717	0.0372397	0.250782
ZNF521	-0.303133	0.000250179	0.0223137	0.0253734	0.0221355	0.526243
EDNRB	0.696214	0.000250499	-0.00429066	0.701461	-0.0490914	0.116313
AC021072.1	0.688351	0.000260681	0.00580063	0.598207	0.026618	0.43279
C4BPB	0.741722	0.000260681	0.00190767	0.867441	-0.00386837	0.918843											x
DUSP15	0.623291	0.000260681	0.0222712	0.0256385	0.0012434	0.973199
HHIP	0.774634	-0.000264226	-0.00313511	0.779706	-0.0423829	0.182248
GBP5	4.75089	-0.000272334	0.126927	3.72182e-42	-0.0416449	0.191515
MMP10	0.495616	-0.000275314	-0.0173455	0.0883136	-0.00785537	0.836191										x																			x
SERPINB10	0.875107	0.00028555	0.0281202	0.00413695	-0.0399271	0.213685
TDRD12	-0.225076	0.00028555	0.0182412	0.07174	0.0635517	0.0354888
CATSPERZ	-0.367368	-0.000289095	-0.00491202	0.65807	-0.0337891	0.302531
GZMA	0.644038	-0.000293698	-0.000901634	0.938314	0.00273438	0.943545		x									x																x
OR6N1	-0.459995	0.000296052	-0.0284778	0.00366477	0.00605595	0.875114
CLEC14A	-1.48299	-0.000299277	-0.0057657	0.600529	0.000195313	0.99516
ACSBG2	0.993142	0.000306553	0.013935	0.178702	0.00866807	0.819413
CIDEA	-0.300802	-0.000323506	-0.0166473	0.103267	0.0479586	0.125182	x																x												x
MAL	0.670979	-0.000334327	-0.00228942	0.838156	0.0370443	0.253501						x
GPR3	0.080637	-0.000334647	0.0150532	0.14424	0	1																												x
SFRP4	0.523755	0.000334833	0.032545	0.000816828	-0.00602804	0.875348														x
DES	0.481412	0.000336168	0.0205761	0.0404224	-0.0128467	0.728206																																		x
MAGEB10	0.515114	-0.000338513	0.0193842	0.0545558	0.0422757	0.183224
MAP3K7CL	0.561908	0.000339748	0.0248896	0.0118741	0.030865	0.35262
CD247	0.168049	0.000341604	-0.000545724	0.963223	0.0417762	0.189951		x
GAL	-0.558565	0.000347389	-0.00614323	0.576566	-0.00879243	0.818024																x
PRR15	0.0613362	-0.000348694	0.0282718	0.00393024	-0.0273549	0.418615
ELFN2	-0.00713024	0.000356969	0.00352734	0.751615	0.0457032	0.146822
TTLL13P	0.0145165	0.000356969	-0.0164734	0.107314	0.0286459	0.393187
COL1A2	0.981834	0.000357289	0.0221912	0.0261522	-0.0448134	0.155852														x
DYDC2	-0.0284028	-0.000359516	0.0222629	0.0256869	0	1
PLA2G5	-0.205355	-0.000359516	-0.0153415	0.135965	0	1
TMSB15A	0.527379	-0.000359516	0.0209667	0.0364138	0	1
SYCP2	0.0906801	-0.000361865	0.0494222	2.18555e-07	-0.00410327	0.913871
GZMM	0.422335	0.000370658	-0.00914817	0.391256	0.0370128	0.253701
MIOX	-0.564007	0.00038052	-0.00440907	0.693079	0.00303943	0.936495																			x
NEUROG3	0.30293	0.00038052	0.012352	0.238087	0.0254667	0.456472																																						x
NYAP2	-0.339131	0.00038052	0.00900313	0.399105	0.0525453	0.0901543
TPPP3	-0.228667	0.00038052	-0.0144896	0.160761	0.0223352	0.522375
FRMPD2	0.914272	-0.000384065	0.0160656	0.117393	-0.0143229	0.69737
ZNF683	0.888313	-0.000384065	-0.000710387	0.951237	-0.0130209	0.725695
ARHGAP6	-0.789575	-0.00038697	0.00525164	0.634643	0.0222858	0.523202
FAM9B	-0.865751	0.000391021	0.00049197	0.965911	-0.0502155	0.107693
CYP3A7	0.203904	-0.000394567	-0.0088938	0.405206	0	1
EDDM3A	0.0766893	-0.000394567	0.011961	0.253773	0	1
PDK1	-0.0769477	0.000407062	0.0290122	0.00303471	-0.0696318	0.0198572																						x									x									x
DKK2	0.566383	0.000412345	-0.0106812	0.311405	-0.00583106	0.880534
FAM83F	0.323023	0.00041589	0.0120585	0.249552	0.00278348	0.9427
SAA1	1.76155	0.000418922	-0.00711214	0.514064	-0.0311361	0.348578
C17orf78	0.48728	-0.000419436	-0.00845811	0.430508	0	1
GABRP	0.216334	-0.000419436	0.0289009	0.00315156	0	1
GPM6A	0.421222	-0.000419436	0.0263337	0.0075021	0	1
TEX45	-0.102689	-0.000419436	0.0166081	0.104125	0	1
TMEM189-UBE2V1	-0.075504	-0.000419436	-0.0061256	0.577506	0	1
GJA3	1.46294	0.000426392	0.0146529	0.155716	-0.0286437	0.393187
ADAMTS12	0.223367	0.000440439	0.0341936	0.000420491	0.013309	0.719374
ADRB3	-1.26158	0.000440439	0.00552716	0.616609	-0.0373942	0.248747
NR2E3	0.500298	0.000440439	-0.00499661	0.652821	-0.00626307	0.871237
RTEL1	-0.414241	0.000440439	0.00810109	0.451712	-0.030993	0.350423
TDRD10	-0.206504	0.000440439	0.0027081	0.810311	-0.0333416	0.309794
HBA2	0.664378	0.000441757	0.00284705	0.800534	-0.00527345	0.891492
GNLY	0.595287	-0.000443008	-0.00655257	0.55006	0.0365886	0.260028
LEF1	0.610688	-0.000443984	0.0179767	0.0763178	-0.0381511	0.237544							x
HGF	0.716981	0.000448322	0.0742984	3.22474e-15	0.0207107	0.555548							x
NMRK2	0.314999	-0.000454486	-0.00654373	0.550526	0	1
ACY3	-0.211242	0.000461443	-0.000745311	0.949179	0.0528557	0.0881306
CD3E	0.385199	-0.000464348	-0.0119548	0.253959	0.0457683	0.146229		x
PBX1	0.216874	0.000473582	0.00896011	0.401396	0.0430144	0.175435
ADIPOQ	0.285283	-0.000479355	0.03531	0.000264723	0	1	x
ATP1A3	0.125075	-0.000479355	0.00439332	0.693889	0	1					x
CLVS1	-0.0505897	0.000500358	-0.00386889	0.731122	0.0163945	0.649087																																											x
FLG2	0.823749	0.000500358	0.014506	0.160269	-0.00934855	0.806402
PRSS12	0.166921	0.000500358	0.00978574	0.356226	-0.015934	0.658782
RASL10B	0.169355	0.000500358	0.00878072	0.411272	0.0391442	0.224086
RHOXF1	0.156863	0.000500358	0.0311649	0.00138445	0.0596373	0.0505218
GZMK	0.455566	-0.000502862	-0.0161267	0.115809	0	1											x
ZDHHC19	0.162084	-0.00051162	-0.0617553	7.06111e-11	-0.00226125	0.954186
CYP3A43	0.177475	-0.000514405	0.0143001	0.166487	0	1
CNTNAP3B	0.522119	0.000525227	-0.0100744	0.341546	-0.0149669	0.681765
EDIL3	0.605997	0.000525227	0.00643433	0.55744	-0.0305325	0.358524														x
EPB41L1	-0.830527	-0.000527387	-0.0909649	3.25021e-22	0.041836	0.189203
CAPN6	0.449288	0.000536727	-0.000895387	0.938409	0.00143229	0.969959
FCRL3	-0.0120448	0.000536727	-0.00993003	0.349203	-0.0429688	0.175454
RIPPLY3	0.391608	0.000536727	0.00320975	0.774406	-0.0277344	0.4112
AC026954.2	-0.203631	-0.000539274	-0.00125168	0.913152	0	1
AC106782.1	-0.474101	-0.000539274	0.0167338	0.101278	0	1
GPHA2	0.450591	-0.000539274	0.00514739	0.641934	0	1
GPR37L1	-0.862066	-0.000539274	0.00279353	0.80407	0	1
HRC	-0.135762	-0.000539274	0.0251399	0.0109948	0	1																																		x
OPRM1	-0.732318	-0.000539274	0.0198885	0.0481108	0	1
CD207	0.581096	-0.000549456	-0.00566275	0.607362	0	1																												x
LIFR	2.53839	0.000556783	0.0493374	2.29316e-07	0.0395071	0.219353	x		x
AC008770.3	-0.0937304	0.000560278	-0.0111084	0.291642	0.0175458	0.624746
CCDC178	0.589085	0.000560278	0.00634184	0.563723	0.00529598	0.891434
CU639417.2	0.193978	0.000560278	0.0025672	0.819914	-0.0136314	0.71236
CXADR	-0.151966	0.000560278	0.0072069	0.508255	-0.0223352	0.522375
KDR	0.252827	0.000560278	0.0149305	0.147623	0.0146906	0.68908
PRR25	-0.373051	0.000560278	0.0100104	0.345025	0.0209076	0.552107
RAET1E	-0.0691474	0.000560278	-0.00263037	0.816175	0.0391902	0.223586
SKOR1	0.257205	0.000560278	0.0147205	0.15388	0.0414468	0.193734
XCR1	0.210342	0.000560278	0.0136967	0.186713	0.0113748	0.759951
CXCL14	1.19662	0.000560598	-0.00414851	0.710335	0.0140679	0.703392																x
TMEM45A	1.50649	0.000562479	-0.0203914	0.0423775	0.0130412	0.725353																						x
SLC44A4	-0.939624	-0.000563823	-0.00548063	0.619654	0.036198	0.266407
RFX8	0.607669	0.000565857	0.0249158	0.0117809	-0.0272167	0.420243
KCNQ4	-0.00131243	0.00057078	0.00601442	0.585345	-0.00236972	0.952064
ASS1	0.913725	-0.000583227	-0.00849343	0.428306	0.0127088	0.731379																x
CFAP57	-0.0516029	0.000585147	-0.0174241	0.0866859	-0.0422757	0.183224
RBFOX1	0.316073	0.000585147	-0.000871701	0.939503	0.0353679	0.279253
RDH12	-0.280202	0.000585147	0.00194925	0.864726	0.020401	0.562128
TMEM105	-0.906773	0.000585147	0.00695299	0.524914	0.0107301	0.774289
VEPH1	0.867614	0.000585147	0.0177812	0.0798386	0.00170392	0.965385
IL2RB	0.49073	-0.000593615	-0.0113847	0.278606	0	1		x				x																	x		x		x
ORM1	0.0201953	-0.000598874	-0.0273795	0.00531198	-0.00976564	0.797259	x
ANKRD29	0.0975326	-0.000605526	-0.107508	1.48141e-30	-0.055226	0.0731081
MZB1	0.471112	-0.000609375	0.00742995	0.494087	0	1
IGSF21	-0.472875	-0.000618483	-0.0024618	0.827015	0	1
ABCA13	-0.191291	0.000620197	-0.026477	0.00717555	0.0388218	0.228841
CD8A	0.444048	0.000620197	-0.0110192	0.295826	-0.043381	0.170941		x
CNTNAP2	0.431067	0.000620197	-0.00816823	0.447985	-0.018605	0.601615
FSD1	0.340811	0.000620197	0.0130565	0.209851	0.00653938	0.864787
NPIPA8	-0.568229	0.000620197	0.0123237	0.239096	-0.0148748	0.684293
POC1B-GALNT4	-0.193227	0.000620197	0.00526469	0.634057	0.00865777	0.819428
TEX46	0.397735	0.000620197	-0.00223152	0.842292	0.0472033	0.132188
ADCYAP1	0.990721	0.000630699	0.0202214	0.0442564	-0.0593934	0.0514876																																											x
APCDD1L	0.325262	0.000645066	-0.00547	0.620045	-0.00617096	0.873117
WASF3	0.234932	0.000645066	-0.0153617	0.135417	0.0442559	0.161716
AC098650.1	-0.325136	-0.000659113	0.00899527	0.399451	0	1
KBTBD12	-0.31865	-0.000659113	0.0101603	0.337547	0	1
SPTB	-0.128117	-0.000659113	-0.0104312	0.323641	0	1																					x
SRPX	-0.308605	-0.000659113	0.015537	0.131001	0	1						x																x
ALPK2	0.193805	0.000680117	0.0135361	0.192453	0.0239584	0.487137
CARD10	-0.550412	0.000680117	0.0271837	0.00567579	-0.041677	0.19116
CSMD3	0.00863454	0.000680117	0.0198448	0.0486051	0.0314535	0.343054
KL	-1.13764	0.000680117	0.0252045	0.0107902	0.0367495	0.25756
PLPPR4	0.618087	0.000680117	0.00369246	0.742114	0.0302101	0.363648							x
RHOD	0.553152	0.000680117	0.00302235	0.78717	-0.00644728	0.86703															x
HOXB5	0.94718	0.000690618	0.0300742	0.0020766	-0.00225688	0.954186
HIST1H3F	-0.580938	-0.000694164	-0.00469749	0.672221	0	1
C15orf38-AP3S2	-1.12732	-0.000708531	0.0245955	0.0130026	-0.0100261	0.791829
DNAI2	0.723844	0.000715487	0.0297512	0.00233209	-0.0395705	0.218466
RRM2	0.714902	0.000715487	0.0210783	0.0353633	-0.00101559	0.978555													x																		x
RNASE13	-0.120214	-0.000719032	0.0193285	0.0553067	0	1
DDX25	-0.332174	0.000726987	0.00352986	0.751615	0.0144746	0.694288																																											x
DACH1	0.866862	-0.000733079	0.0251867	0.0108409	0.0128485	0.728206
NXF3	-0.421425	0.000737809	-0.00357831	0.748717	-0.0262221	0.441052
CYP4F12	0.0553293	0.000740036	0.00966963	0.362651	-0.0165787	0.645241
PALM	0.0578887	0.000740036	-0.00485501	0.661335	0.0127564	0.730709
VIPR2	0.658873	0.000740036	-0.0011333	0.921878	0.00561834	0.885541
ELANE	0.146701	0.000746992	0.0189396	0.0607907	0.0207681	0.554168		x
STXBP6	-0.728666	0.000746992	0.0294494	0.00260016	0.0510151	0.101663
PDE1C	0.6639	0.000750538	-0.00419035	0.707387	-0.0405109	0.206125
DTX3	0.322082	0.000764905	-0.00413457	0.71097	0.031914	0.334395
FBXW12	0.202536	0.000764905	0.00721649	0.507943	0.00520387	0.893013
PTGDS	-0.576257	0.000772644	-0.0214437	0.0321685	-0.00348027	0.926556
COL6A1	-0.457478	0.000773629	-0.046122	1.40953e-06	0.0201681	0.566793																							x
DLGAP5	0.754225	0.000775406	0.00026266	0.981749	0.00270825	0.944015													x																	x
FAM110D	0.797742	0.000775406	0.0174846	0.0854587	-0.00327247	0.931635
KLK4	-0.21574	0.000775406	-0.0114414	0.276065	0.0203119	0.564172
NPFFR1	0.144179	0.000775406	0.00596279	0.588076	0.049576	0.112192
TRPM6	-1.09182	-0.000778952	-0.00428324	0.701583	0	1
CETP	-0.337391	0.000786906	-0.0127072	0.223609	0.0215045	0.538555
ONECUT3	0.501398	0.000786906	0.0167952	0.0998619	0.00532068	0.891268
CASC1	0.0360898	0.000799955	-0.0222264	0.0259241	0.0238549	0.488806
DYNLRB2	0.34362	0.000810457	0.00237376	0.832603	0.00917796	0.808965
FABP6	0.366007	0.000810457	0.0134879	0.194056	-0.0309192	0.351605																																							x
MEGF11	0.0547843	0.000810457	0.00272445	0.809183	-0.0208385	0.552909
NEURL3	4.87504	0.000814916	0.0397926	3.53302e-05	-0.0959489	0.000879127
AKAP6	-0.709487	0.000826538	0.00810751	0.451446	0.00935239	0.806402
GPR173	-0.134737	0.000856649	0.0499138	1.64059e-07	-0.0387938	0.229177
CD244	0.55242	0.000870376	-0.014879	0.149087	0.063832	0.034655
EOMES	0.464911	0.000871694	0.00145048	0.898667	0.00933589	0.806402																							x
WNK2	0.117402	-0.000873922	0.00485922	0.661335	0	1
ANKRD53	2.3933	-0.000885935	0.0188448	0.0621768	-0.00752245	0.843178
NKG7	0.791212	0.000893261	-0.0106074	0.314703	-0.000536403	0.986942
ZNF208	-0.324862	0.000895245	-0.00339253	0.76068	0.0119991	0.745765
SOCS3	1.42801	-0.000898508	-0.0522565	4.00948e-08	-0.0205281	0.559256																								x			x
POU3F2	1.45201	-0.000901018	0.0273946	0.00528708	0.0168465	0.639205
RBP4	0.0159359	-0.000912198	-0.0356613	0.000227754	-0.0349004	0.286383																													x
PPP1R9A	0.448756	0.000920114	-0.0102098	0.334934	-0.0193339	0.584761
C17orf98	-0.317035	0.000930296	0.0108626	0.303037	0.0476953	0.127708
IRS1	0.637739	0.000930296	0.012209	0.243534	0.0302421	0.363107					x
SAMD11	0.233179	0.000930296	-0.00130043	0.909539	0.0322567	0.328616
BCL11B	0.46875	0.000931614	0.000661799	0.954799	0.0206555	0.556623															x
MMP7	0.599753	-0.000933841	-0.0102853	0.331136	0	1										x
CD3D	0.728935	-0.000933841	-0.0143542	0.164795	0	1		x
ADAMTS10	0.0352201	0.000940798	0.0154192	0.13388	0.0202364	0.565586
FOXB1	1.0155	0.000942115	0.0229447	0.0211659	-0.0270563	0.423574
PRF1	0.951121	-0.000947552	-0.0132529	0.202604	0	1		x					x
ACSS3	-0.894261	0.000951299	0.020294	0.0434769	0.0434728	0.170049
APOBEC3H	2.07599	0.000953456	-0.00334097	0.763995	-0.0811085	0.00569634
NCAM1	0.361799	0.000955165	0.00857598	0.423465	0.0261421	0.442593																																		x
CLEC4C	0.916005	0.000965666	-0.0035775	0.748717	-0.00531164	0.891268
NTRK3	0.12096	0.000966664	-0.010099	0.340674	0.0371651	0.251823
TLX1	0.517834	0.000966664	0.0204788	0.041415	-0.00606857	0.875114																												x
CLDN14	1.04283	0.000966984	0.0103722	0.326446	-0.0141587	0.701352					x
SH2D3A	0.588717	-0.000971157	0.00938756	0.377895	-0.0180754	0.612764
TIGD4	0.741028	0.000990215	-0.00997138	0.34704	0.0332137	0.311376
RAB37	-0.181382	0.000993626	0.0160248	0.118272	-0.00669177	0.862239
AJAP1	0.771877	0.00101508	0.00260038	0.81801	0.0162871	0.650785
IL12RB2	0.663722	0.00101508	-0.00393021	0.726955	0.0156853	0.66438																																											x
AF130351.1	1.39292	-0.00101628	-0.0187778	0.0631351	0.0222567	0.523371
MS4A1	0.476152	0.0010178	0.00982346	0.354256	-0.0561339	0.0678418
FIGLA	0.955813	-0.00101863	0.00363483	0.74595	0	1
PGA5	0.157676	0.00102172	0.0193316	0.0552882	-0.0450243	0.1539
DIAPH3	0.471678	0.00102559	0.00491517	0.658054	-0.0224848	0.518966													x
MSI1	0.542109	0.00102658	0.0172574	0.0901309	0.00119735	0.973728
RAB27B	0.962863	0.0010269	0.0255297	0.0097305	0.0416187	0.191678
MAFF	-0.65912	-0.00103822	-0.16085	3.52417e-67	-0.148391	1.00749e-07										x	x											x	x
TMEM56	0.636947	0.00103995	-0.00561737	0.610531	0.0378779	0.241593
LOR	-0.160419	-0.00104238	-0.0442727	3.79027e-06	-0.0338647	0.301488
PHEX	-0.242872	0.00105013	0.0067501	0.538151	0.00221926	0.955003											x
PID1	0.306856	0.00105013	0.0278897	0.00448419	0.0305807	0.358127
RRH	-0.249269	0.00105013	0.00257457	0.819565	0.0291137	0.384827
TEAD3	-0.0310052	0.00105013	0.015389	0.134658	-0.00240733	0.95145
KYNU	1.50947	0.00105018	0.0324622	0.00084359	-0.145196	1.96474e-07											x
IL1RL1	0.4314	0.00105145	0.00721338	0.507974	0.0536966	0.0825567																							x
SYT12	0.777704	-0.00105368	0.0143834	0.163851	0	1															x
CXCR3	0.708737	-0.00106354	-0.0187902	0.062965	0.0238282	0.489295		x
PAX5	5.80229	-0.00107143	0.117155	4.49196e-36	-0.0945839	0.00105804
CATSPERB	0.911159	0.001075	0.0178604	0.0783642	0.0208009	0.553487
FAM3D	0.429174	0.001075	0.0281854	0.00404649	0.0229073	0.509066
OMD	0.714898	0.001075	0.00982728	0.354234	-0.0203119	0.564172	x
CABP1	0.797104	0.00108164	0.0110179	0.295826	0.0477401	0.127312
FAM129C	-0.0500816	0.00108164	0.0050019	0.652629	-0.0259235	0.447138
HOPX	-0.447949	0.00108548	-0.0827064	1.43059e-18	-0.0171818	0.633183																							x
NIPAL4	0.422424	0.0010865	0.0196506	0.0510168	-0.0396947	0.216859
SYCP1	1.55912	-0.0010926	0.0278068	0.00460704	0.00165787	0.965783																																											x
CACNA1C	0.571136	0.00111005	0.00182274	0.873018	0.0391568	0.224004
COL12A1	0.581564	0.00111005	0.0212833	0.0336151	0.0284366	0.397198														x
F2RL1	-0.580444	0.00111005	0.0152966	0.137137	-0.0209889	0.550116																													x
GYPE	0.121409	0.00111005	0.0118677	0.257504	0.0608604	0.0455273																					x
OR2B6	0.531914	0.00111005	0.0126375	0.226093	0.0111715	0.764138
SHROOM2	-0.43448	0.00111005	0.0170596	0.0942548	0.0170394	0.635046					x	x																								x
TRIM17	-0.439079	0.00111005	0.00192622	0.86643	-0.0342669	0.295537
UTS2B	0.822037	0.00111005	-0.0025266	0.822313	0.00203119	0.959555
TNNT1	0.804792	-0.00112696	-0.0596275	3.19611e-10	-0.0114904	0.756873																																		x
PRRX1	0.570981	0.00113492	0.00535103	0.627772	-0.0182055	0.61049														x															x
PDE9A	-0.422676	0.00114253	-0.0419178	1.26255e-05	-0.00227749	0.954186
KIF26B	0.844181	0.00114542	0.0133718	0.198164	0.0449045	0.155006
LAX1	0.884575	0.00115756	0.01291	0.215401	0.00370274	0.922645
SLC16A6	-2.45351	-0.00115985	-0.0496555	1.90961e-07	-0.0845591	0.0037768
ARHGDIG	0.529342	0.00116997	0.010695	0.310905	0.0180926	0.6127																												x
KCNE4	-0.202651	0.00116997	-0.00628072	0.56725	0.0100807	0.79163
TNNC2	0.10932	0.00116997	-0.00458427	0.680733	-0.0248632	0.46884																																		x
LPAR4	0.184443	0.00119484	0.00287584	0.798666	0.0163628	0.649669
RAET1L	0.493959	0.00119484	0.0236876	0.017024	-0.0104192	0.78254
GZMB	0.228536	0.00119765	-0.00536911	0.626545	0.00670966	0.862118		x									x
ROR2	-1.07355	0.00120148	0.0407824	2.20181e-05	0.0161885	0.652484
FAM166B	0.179014	0.00122989	-0.00907363	0.395061	0.0381036	0.238025
STARD6	0.467496	0.00122989	0.00661027	0.546282	0.0205	0.559569
SYT4	0.333517	0.00122989	0.00182977	0.872985	0.0368302	0.256528
TMPRSS2	-0.0788913	0.00122989	0.0144849	0.160847	-0.0116229	0.754285			x
NRXN2	0.665375	0.00124039	0.0246425	0.0128161	0.00606113	0.875114					x
MECOM	1.2524	0.00125122	0.0212109	0.0341882	0.0119284	0.747374
IFNA10	1.38643	-0.00125134	0.0289842	0.00306412	0.0296575	0.374699
COL6A5	0.303112	0.00125476	0.00891528	0.404136	0.0208385	0.552909
GDAP1L1	0.0366154	0.00125476	-0.00679669	0.535452	-0.0140302	0.703701
HOXA13	0.426205	0.00125476	-0.00497879	0.654041	0.0162977	0.650785
ARHGAP8	0.364564	-0.00125799	-0.0041884	0.707387	-6.51043e-05	0.998048
KLRB1	1.31747	-0.00127277	-0.00962898	0.364679	0.0314454	0.34306
KCNH4	-0.0526706	0.00128981	0.00161786	0.886575	-0.0636815	0.0351197
OR8D4	0.540319	0.00128981	0.0117881	0.260494	0.0262531	0.440567
SFN	0.00167065	0.00128981	0.000502459	0.965332	0.0312832	0.346231															x	x																					x			x
UBD	0.542612	0.00128981	0.0218566	0.0287066	-0.0182807	0.609048
PGGHG	0.233079	0.00130759	0.0419189	1.26255e-05	-0.0208926	0.552107
NEBL	0.424883	0.00131468	0.00836605	0.435516	0.0382164	0.236761
FAM107A	1.34118	0.00132196	0.0311749	0.00137986	-0.0197522	0.575967
GABRR2	-0.108157	0.00134973	0.00816801	0.447985	0.00710916	0.853284
MAATS1	1.54826	0.00135769	0.0263047	0.00757157	-0.00323166	0.932561
AC005779.2	0.0895186	0.00136023	0.0122679	0.241214	0.0163911	0.649087
NFIB	0.970979	0.00136023	-0.00021759	0.984968	-0.015082	0.679367
FFAR3	0.551048	0.00136851	0.0212255	0.034065	-0.032831	0.318423
SELENBP1	0.181642	0.00137137	0.0341453	0.000428635	-0.00186931	0.962019																					x	x
FRMD3	4.34289	0.00139075	0.0168008	0.0998246	-0.129077	4.4768e-06
OXT	-0.856071	0.0013966	0.0066724	0.542386	-0.0234672	0.496696																												x
CLDN4	-0.20526	-0.00140842	0.0600631	2.35622e-10	-0.0194523	0.582098					x
DCDC2B	-0.618767	0.00142015	0.00436555	0.69545	0.0373118	0.249919
UNC80	-0.963925	0.00142047	0.00952134	0.370825	-0.0199084	0.572238
RSPO3	0.0702557	0.00142147	-0.0154639	0.132794	-0.0125271	0.734057
LURAP1	-1.55294	0.00143065	0.0142749	0.167289	0.0164153	0.648898
CFHR1	0.179765	0.00143484	-0.0125756	0.228546	0.017662	0.621832
ICOS	0.445874	0.00144502	0.000900169	0.938314	0.0432752	0.172146																							x
C7	0.305138	0.00145652	0.00182661	0.872985	0.0272194	0.420243
GPC3	0.148457	0.00145652	-0.0062172	0.571886	-0.00196085	0.960456																			x			x			x
TSPAN6	0.367548	0.00145652	0.0123385	0.238577	0.00480988	0.901386
TFAP2A	0.942408	0.00146602	0.00361513	0.747361	0.0133819	0.717695
SULT1C4	0.486847	0.00147128	-0.00112997	0.921878	0.0128486	0.728206
SEC14L4	0.511087	0.00148007	3.4469e-05	0.997377	-0.01222	0.741242
TMC7	-0.143221	0.00148007	-0.000513095	0.965066	0.0199431	0.571739
HTR2C	1.04856	0.00148171	0.0164275	0.108315	0.0205122	0.559465
MUC1	2.11139	0.00150384	0.167565	7.31489e-73	-0.0926174	0.00137284															x								x
CTGF	1.59495	0.00150697	-0.0223412	0.0251953	0.034178	0.296978
SV2C	-0.124238	0.00151644	0.0184592	0.0682234	0.00992759	0.793703
CD200	-1.00944	0.00153999	0.00599821	0.58619	0.0129043	0.727573
MRO	0.285179	0.00153999	0.0216773	0.0301816	0.0322934	0.328171
DPPA4	0.878981	0.0015417	0.00908349	0.394589	0.00601744	0.875361
ADAM28	1.13668	-0.00154313	0.017532	0.0845543	-0.0367337	0.257707
RHO	-1.09444	-0.00155232	-0.0171466	0.0923953	0	1
GRID2	-0.360825	0.00155424	0.0231366	0.0200389	0.0180118	0.614117																												x
PDK4	-3.57137	0.00156318	0.0196155	0.0514442	-0.00429519	0.910212																																				x
FUT1	0.0821946	0.00157536	0.0307509	0.00161995	0.0333262	0.309949
FLNC	0.472181	0.00157636	0.0142296	0.168596	0.0415641	0.192252					x
MLANA	-0.70886	0.00157636	-0.00682138	0.533791	0.0656375	0.0294786
SLC5A5	0.429658	0.00157636	0.00350757	0.75283	0.0126602	0.731956																												x
ZMAT4	-0.89891	-0.00159295	-0.0204341	0.0419051	0	1
PER3	-1.07807	0.00159852	-0.0289131	0.0031393	-0.0820968	0.00509217
CHST6	-0.183586	0.00159991	0.00885332	0.407513	0.045263	0.151451																			x
GXYLT2	0.486478	0.00159991	0.0041386	0.710911	0.0240164	0.486286
MT3	1.06909	-0.00160314	0.0057418	0.601976	0	1											x
GAS1	-1.49126	0.00161173	-0.0031617	0.7777	0.0169836	0.635915						x								x
GLDN	1.95147	-0.00161483	-0.0698145	1.42567e-13	-0.0222773	0.523202
CUX2	-1.27793	0.00162123	0.0342195	0.000416675	-0.00232354	0.953145
CST3	-0.134605	-0.00162235	0.28949	5.53944e-221	0.028753	0.391187
AGAP1	-0.365158	0.00162255	0.0147103	0.154148	-0.0101744	0.788996
E2F7	0.755811	0.00162478	0.0182912	0.0709447	0.0246356	0.472544
VNN3	0.641469	0.00164054	0.00540347	0.624474	0.0146314	0.690608
IL36G	0.867631	0.0016481	0.0067347	0.538696	-0.0296579	0.374699
OR2AE1	-0.190963	0.00165983	-0.000375536	0.973997	-0.0132954	0.719509
SIM2	0.331679	0.00165983	0.0127041	0.223651	-0.0198227	0.574195
CASP5	2.78358	0.00166757	0.0475109	6.52759e-07	-0.00202449	0.959555											x
SFRP1	0.738637	0.00167165	0.0290812	0.00296242	0.0405079	0.206125														x
AKR1C2	0.350341	0.00167729	-0.0183171	0.0705171	-0.0321673	0.329841
PAX9	0.695903	0.0016847	0.0245502	0.0131771	-0.0607743	0.0458432
EDA2R	-0.981703	0.00169921	-0.0422198	1.08753e-05	-0.0254682	0.456472
VSIG4	-0.0290086	0.00170599	-0.0409998	1.98438e-05	-0.0262967	0.439814
NCALD	0.646625	0.0017067	-0.00831744	0.438641	0.0181134	0.612679
FAM171A1	1.11523	0.00170911	0.0512299	7.4779e-08	0.0011787	0.973957
ANKS4B	0.0694469	0.00171975	-0.00700853	0.521369	0.0196172	0.579345
FAM83E	0.504629	0.00171975	-0.0159415	0.120323	0.0743955	0.0120299
MAP1LC3C	-0.457907	0.00171975	0.0121448	0.245903	0.0185744	0.602252
MAP2	0.186689	0.00171975	0.0149821	0.146103	0.0711694	0.0169472
MFAP3L	0.0420449	0.00171975	0.0198761	0.0482476	0.0584606	0.0558101
TAS1R3	-0.88519	0.00171975	0.0258493	0.00877643	0.0411896	0.197162
DIRAS3	0.536797	0.00172007	0.012274	0.241138	-0.00504412	0.897659
HOXA7	0.646072	0.00174462	0.01217	0.245077	0.0857031	0.00328768
OR8A1	-0.0919443	-0.00174589	-0.0196756	0.0507534	-0.0045573	0.905985
STC2	1.35991	-0.0017472	-0.0231425	0.0200136	-0.0300259	0.367249															x				x			x												x
HOOK1	0.954183	0.00175512	0.0210065	0.0360285	0.0293317	0.380891
KCTD16	0.125784	0.00176662	0.0183646	0.0697433	0.0614326	0.04324
PROM2	0.224704	0.00176662	0.0109651	0.297897	0.0500471	0.108849
TKTL1	1.2124	0.00177844	0.00912997	0.39194	-0.00933004	0.806402																			x			x																					x
C12orf54	0.341632	0.00177967	-0.0058647	0.594195	0.0373118	0.249919
CABP7	-0.10071	0.00177967	0.00221162	0.843428	0.00762529	0.840898
DLL4	0.451625	0.00177967	0.0205542	0.0406265	0.021996	0.528689
GOLGA6L7P	0.394581	0.00177967	-0.00312059	0.780675	0.0173036	0.630092
HEY1	0.342371	0.00177967	0.000189729	0.98637	0.0555604	0.0711703																				x
RSPH10B2	-0.124321	0.00177967	0.00949045	0.372428	-0.000945015	0.980352
TROAP	0.723587	0.00179017	0.0108125	0.30539	0.03458	0.291249																		x
WNT10B	0.276535	0.00179049	0.0274889	0.00511895	-0.0263862	0.43796
ZBTB32	1.61745	0.00181624	0.0754269	1.2022e-15	-0.0124262	0.73602
ACOD1	3.82302	-0.00181762	0.083331	7.79208e-19	0.00471237	0.902617
NIM1K	0.535755	0.00182654	0.00050744	0.965228	0.033496	0.307461
DGKI	0.555528	0.00183959	-0.00633277	0.564211	0.0537355	0.0823211
TNNT2	-0.130193	0.00183959	0.00251316	0.823147	0.039821	0.214992																													x					x
F2RL3	-0.125317	-0.00184636	0.0490387	2.72695e-07	-0.0120743	0.744596
CADM3	-0.321348	-0.00184742	-0.00166727	0.883502	0	1					x
TACC2	0.126255	0.00185009	0.0249885	0.0115208	0.0304105	0.360056
GAPT	1.00635	-0.0018592	-0.0276455	0.00485426	-0.0595383	0.0509067
PLEKHH2	2.65641	0.0018662	0.0412262	1.77945e-05	-0.000712871	0.98399
ADIRF	-0.0375957	0.00189596	0.0195527	0.0522825	-0.0295276	0.377304
ERVMER34-1	0.274007	0.00189951	0.0101599	0.337547	0.0344768	0.292793
ZBBX	0.27362	0.00189951	0.0155036	0.131801	0.0636093	0.0353303
RNF24	-0.679989	-0.00193537	0.00890512	0.404633	-0.106887	0.000184745
XCL1	-0.0808324	0.00195688	0.00786757	0.465455	-0.0208162	0.553296																											x
CEP126	0.19752	0.00197025	0.0151822	0.140525	-0.044332	0.161125
SHROOM3	2.02548	0.00198139	-0.0212403	0.0339744	0.0492063	0.115332
NRG1	0.754675	0.0020063	0.0118733	0.257345	0.0463764	0.14026
COLGALT2	-0.849145	-0.00200834	0.0230806	0.0203488	0.0208708	0.55248
CXCL12	1.28189	0.00201776	0.0505994	1.09472e-07	0.0352372	0.281017														x	x	x
NRTN	-0.313406	0.00202762	0.0206059	0.040112	-0.00704408	0.854376					x
DOK7	0.762395	0.00204453	0.00739127	0.496125	0.027903	0.407917
ARHGEF38	1.20077	-0.00204744	0.024936	0.0117111	0	1
HOXC8	0.911053	0.00205472	0.0282085	0.00401552	-0.0504704	0.105758
YIPF7	0.642742	0.00205472	0.00508795	0.646212	0.0286611	0.393153
IL5	0.459902	0.00206622	0.00440315	0.693321	0.0743897	0.0120299																												x
NPY1R	0.451743	0.00206622	0.00350676	0.75283	0.0127414	0.730884															x	x
PRKG2	-0.00620181	0.00206622	-0.0037399	0.739678	0.0404727	0.206432																													x
CAMK2N1	1.28716	0.00206654	0.0201096	0.0455298	-0.00696533	0.856209
HP	0.380243	0.00208977	-0.00599129	0.586277	0.0381218	0.237845
SCARF2	-0.639724	0.00208977	0.0187732	0.0631409	-0.00892198	0.814839
SV2A	-0.0755361	0.00210027	0.0175694	0.0838651	0.0690142	0.0211098
EML6	0.418674	0.00210059	0.00868438	0.417112	-0.0425623	0.180282
FOXE1	0.436681	0.00212614	0.00905806	0.395879	0.0470825	0.13322
GAL3ST1	0.093689	0.00212614	0.00454872	0.683191	0.0788925	0.00734675																			x
MOCS1	0.08506	0.00214969	0.0282935	0.00390427	0.0295067	0.377602
PCDHB14	0.299673	0.00214969	0.0156174	0.128775	0.038866	0.228364
NDP	-0.61423	-0.00218425	-0.0282264	0.00399222	-0.0646971	0.0320549																									x
RYR2	0.487081	0.00218606	0.0153004	0.137086	-0.0154146	0.672017																												x
HOXC13	0.671425	0.00219032	0.0228182	0.0219618	0.00160362	0.966764
NANOG	-0.0960356	0.00219169	-0.00133779	0.906602	0.0486622	0.119414
PRSS57	0.122281	0.00219301	0.0129831	0.21248	0.0569367	0.0633923
GSTM5	0.654396	0.00219656	0.0177491	0.0803961	0.0357984	0.272777
DOC2A	0.201449	0.00220383	0.010122	0.339609	0.0341052	0.298126
CRLF2	1.19196	0.00220561	0.0491371	2.57719e-07	-0.0341042	0.298126																								x
TESMIN	-0.0656966	0.00220961	0.00882019	0.409352	-0.0293317	0.380891
ZNF560	0.0113672	0.00220961	-0.00144543	0.898796	0.0503317	0.106826
DEPTOR	-1.76893	0.00222452	0.0312568	0.00133811	0.0484356	0.121112															x
HBA1	-0.0819036	0.00224407	-0.00749404	0.49002	-0.0220783	0.527119
ZNF860	3.56203	-0.00226944	0.0678777	6.78926e-13	-0.0126422	0.73216
CYP1A1	0.539247	0.00226953	0.00587756	0.593688	0.0252789	0.460026																	x
NPTX2	0.474587	0.00226953	0.0263811	0.00739131	0.0793648	0.00695474
ARX	0.248756	0.00229439	0.0213968	0.0325834	-0.0100299	0.791829
ATP2B4	-0.943469	-0.00230558	-0.132906	4.03412e-46	-0.10862	0.000141472																x
CCDC80	0.73835	0.00231177	0.066198	2.53278e-12	0.0198786	0.572845
PRLHR	0.255336	0.0023164	0.00252614	0.822313	0.0366501	0.259063
ANKRD31	-0.16274	0.00232944	0.00385558	0.731703	0.0428022	0.177308
HS3ST2	-1.12886	0.00234495	-0.216409	9.62064e-122	-0.0297158	0.373731
FCGBP	0.598726	0.00235712	0.0136955	0.186713	0.0125893	0.732996
HAMP	-0.370361	-0.00235765	-0.050521	1.1462e-07	-0.00889043	0.815521
HLA-DOB	0.994699	0.00236449	0.0460877	1.43562e-06	-0.043982	0.164741		x
GPRC5A	0.674932	0.00236482	0.0253569	0.0102794	0.0648339	0.0316473
ATP1B4	0.835047	0.00237631	-0.00526128	0.634097	0.0660401	0.0283349
CFAP69	0.69603	0.00237631	0.00511915	0.643998	0.0109248	0.770043
RNASE2	-0.376114	0.00237631	-0.00546368	0.620321	-0.0356125	0.275391
DLX5	0.448787	0.00238936	0.0155176	0.131513	0.00535431	0.890904
FOXG1	0.518918	0.00238936	-0.00159701	0.887469	0.00390428	0.918386
RNF157	0.533562	0.00239796	-0.0121634	0.245245	0.0550068	0.0744963
FOXC2	0.602438	0.00240118	0.0192771	0.0559757	0.0116601	0.753654														x
KLHL13	-0.431086	0.00241037	0.0388627	5.44824e-05	-0.0154615	0.670871
CLEC4F	1.44223	-0.00241546	-0.0161999	0.113923	0.0458985	0.14488
KIF25	1.0459	0.00243303	0.0113742	0.279023	0.0167579	0.641051
ATP10B	0.436923	0.00243623	0.00319236	0.775621	0.0126917	0.731379
EN2	0.0134097	0.00243623	0.00163106	0.88604	0.0311888	0.347772
CLEC5A	-0.271503	-0.00244452	-0.0544529	1.01305e-08	-0.00240062	0.95145																									x
PATE1	0.235875	0.00244928	0	1	0.0534736	0.0840111
RPL29	-0.380713	0.00245968	-0.451441	0	-0.241592	5.41823e-19
C4orf26	0.971389	0.00245979	0.0211442	0.0347486	0.0694402	0.0202354
MSH4	-0.172226	0.00245979	-0.00695879	0.524683	0.0368501	0.25631
SLC10A6	0.522149	0.00245979	0.00496156	0.655213	0.0473755	0.130491
FAM227A	-0.206464	0.00246906	-0.00348353	0.754271	0.0503499	0.106725
HOXD9	0.293004	0.0024726	0.0131422	0.206668	-0.000316885	0.992188
SSPN	0.73568	0.00247425	-0.0774992	1.88335e-16	-0.0590996	0.0527964	x																										x							x							x
H6PD	-0.422087	-0.00247985	-0.125908	1.6875e-41	-0.0783591	0.00781673
ADAMTS5	-2.55893	0.00248558	0.00383292	0.733363	0.0195272	0.580443					x
ALDH1A3	0.32825	0.00249615	-1.25326e-05	0.998925	0.0353238	0.279797			x																										x
CBLN1	0.490177	0.00249615	0.00597528	0.587314	0.00405701	0.914763
SLC1A2	-0.450144	-0.00249743	-0.0265055	0.00711206	-0.0291031	0.384889																									x
PTPRT	1.5928	0.00250211	0.0501384	1.43922e-07	0.0149716	0.681765
LRRN3	1.47529	0.00251145	0.0202702	0.0437387	0.00723904	0.850163
GPR83	0.608608	0.0025197	0.00146389	0.89781	0.081688	0.00533555																							x
EDARADD	2.07164	-0.00252337	0.0398241	3.4841e-05	0.00837068	0.824102
FLRT2	-0.764665	0.00253047	-0.016396	0.109064	-0.0036154	0.923553
TRAPPC3L	3.1254	0.00253926	0.0976284	2.09334e-25	-0.00244443	0.950773
PLPP2	0.509927	0.00254457	-0.019847	0.0486008	0.0437995	0.166621
BLM	-1.24318	0.00255341	0.0301838	0.00199821	-0.0687792	0.0215945
RCAN2	0.478041	0.00257962	0.0105601	0.317204	0.0848033	0.0036677
GTSF1	0.354087	-0.00260266	-0.0064645	0.555758	0.0159482	0.658624
IL9R	-0.717816	0.00261599	0.000571052	0.961357	0.00549942	0.887982																								x
TMEM171	2.60025	-0.0026193	0.0733256	7.50226e-15	-0.0309889	0.350423
CDH1	-0.799817	-0.00262303	-0.0526299	3.18734e-08	-0.0151404	0.678521					x											x
C5orf47	0.481218	0.00263954	0.0200877	0.0457768	0.0497637	0.110893
GDF7	0.264347	0.00263954	0.000117705	0.99136	-0.00431338	0.909973
HTRA3	0.584307	0.00263954	-0.0115225	0.272538	-0.0217799	0.53373
RGN	0.424354	0.00266286	0.0119996	0.25203	0.0569141	0.0634852										x
NTM	0.732063	0.00266441	-0.000760033	0.948225	0.0166678	0.643211														x
RCOR2	-0.777905	0.00267591	0.000293783	0.980059	0.00844493	0.823011
ZIC1	0.457064	0.00267591	0.00760076	0.482907	0.00641906	0.867586
BOD1L2	0.487081	0.00267591	0.000430231	0.970419	0.0692182	0.020673
DMRTA1	0.556887	0.00267591	0.00673751	0.538696	0.0528515	0.0881306
NPTX1	0.452983	0.00268928	0.0170937	0.0935339	0.0532783	0.0853291
CCL14	-0.0468443	-0.00269206	0.132982	3.5913e-46	0.0220484	0.52771
EDN1	2.96729	-0.00269371	-0.0162886	0.111713	-0.021527	0.538164																									x			x
SNPH	0.64601	0.00269946	0.0080933	0.451997	0.0644079	0.032913
COL24A1	0.364017	0.00271147	0.0681216	5.59381e-13	0.0275153	0.415722
PKMYT1	-0.266787	0.00272047	0.00520607	0.637871	-0.0219495	0.529742
PTCH1	-0.0465922	0.00273328	-0.00647972	0.555013	-0.00146602	0.969605																				x			x
RBM24	1.00516	0.00273615	0.0202174	0.0442832	0.0250405	0.465325
IFNA2	1.87325	0.00274794	0.0564424	2.76548e-09	0.0546264	0.0767299
PYGO1	0.308281	0.00275938	-0.00965284	0.363523	0.0862241	0.00309062
CLLU1OS	1.46339	0.00276897	-0.00639126	0.560334	-0.0488298	0.118178
ARHGAP29	0.0396451	0.0027702	0.00490869	0.6581	0.101138	0.000428288																														x
GJA4	2.28887	-0.00279638	-0.0130769	0.209093	0.00280917	0.942242
CYR61	0.63609	0.0028193	-0.0144378	0.162329	0.048033	0.124636
PATE2	0.443258	0.0028193	0.0065671	0.549371	0.0703188	0.0184695
SMC1B	0.176339	0.0028193	-0.017933	0.0770773	0.0707448	0.0177338
GLIS3	1.02169	0.00284062	0.0152903	0.137266	0.0460724	0.143236
DRICH1	-0.0633627	0.00284162	-0.0160422	0.117914	0.00950023	0.803752
ABCD2	0.586186	0.00285212	-0.0144214	0.162822	0.0241469	0.483933								x																															x
CCDC116	0.157809	0.00285467	0.0106616	0.312131	0.0404909	0.20627
SMARCA1	0.0286558	0.00285467	0.00710223	0.514599	0.0321806	0.329723
SAXO1	0.1488	0.00286617	0.01272	0.223148	0.0333622	0.309535
HAND2	0.457064	0.00287922	0.0130309	0.210745	-0.0047394	0.90228
COL6A2	-0.439905	-0.00288189	-0.0358616	0.000209134	0.0343968	0.293751														x																				x
EFCC1	0.451596	0.00289104	-0.00669735	0.541115	0.0520842	0.0936015
SIX4	1.26793	0.00292541	0.0200556	0.0461532	0.012949	0.726592
ACTC1	0.394985	0.00293914	0	1	0.0627038	0.0384663					x																							x						x
EPHA8	0.266377	0.00293914	0	1	0.0776409	0.00845295
SNX31	0.256118	0.00293914	0	1	0.0738068	0.0127932
MTSS1	-3.16688	-0.00294438	0.0263392	0.00749219	0.0254928	0.456472
DLK2	-0.0889575	0.00294964	-0.00985615	0.353001	-0.00246595	0.950773																												x
OR52I2	0.788413	0.00294964	0.0157986	0.123954	0.0049682	0.89863
RPS2	-0.399466	-0.00298181	-0.472937	0	-0.249167	3.81113e-20																																x
ATP1B2	-0.24854	0.00298978	-0.0212301	0.0340379	0.0202653	0.565009
SLC25A5	-0.538303	-0.00299478	-0.38439	0	-0.142817	3.21409e-07																																				x
ARAP2	1.52969	0.0030065	0.0342884	0.000404974	-0.0976089	0.000701809
SERPINA1	0.396567	0.00301575	-0.303744	3.0176e-244	-0.163289	3.84632e-09										x	x					x
CA12	0.156893	0.00303188	-0.0162181	0.113498	0.0200773	0.568646															x	x						x
ACKR3	0.831221	0.00303752	0.0454142	2.06876e-06	0.0163385	0.650127																						x
PCDH11Y	0.351034	0.00303927	-0.00850786	0.427508	0.020008	0.570379
BVES	1.40684	0.00304557	0.0275078	0.00508824	0.00863321	0.819889
SYT1	-1.21083	0.00304719	0.0209117	0.0369587	-0.00528128	0.891492
MORC1	1.13746	0.00305643	0.0114585	0.275313	0.0122703	0.739976
TMEM2	0.558885	-0.00306338	0.052161	4.24944e-08	-0.0177562	0.619832
AQP7	-0.306603	0.00309343	0.125917	1.66717e-41	0.0240617	0.485308																	x
GATA2	1.04795	0.00311635	0.0188964	0.0613828	-0.0201596	0.566793
LIPE	0.101652	0.00312199	-0.0129848	0.21248	0.106639	0.000192052	x							x
SLFNL1	0.152948	0.0031294	0.00316434	0.7777	0.0348932	0.286383
DDIT4L	0.215359	0.00314371	-0.00338242	0.761271	0.0457451	0.146416
GNG8	0.868668	0.00316156	0.0285447	0.00357953	0.00837643	0.824102
TREM1	0.412832	0.00316425	-0.160606	5.61125e-67	-0.133574	1.94054e-06
CD79A	0.225972	0.00316504	-0.0315049	0.00121788	-0.0371854	0.2516		x
RPL13	-0.436624	-0.00317033	-0.442355	0	-0.229696	3.08526e-17
C20orf202	-0.432866	0.00318932	0.0128529	0.217565	0.0726468	0.0144638
CSF3	1.07342	0.00319922	0.0237976	0.0164637	-0.0254161	0.45735																									x
RASL12	-0.0106353	0.00322569	0	1	0.0862796	0.00307378
MS4A2	0.157357	0.00323619	0.00335432	0.763399	0.0909337	0.00171727
PNLIPRP3	1.19813	0.00327188	-0.0150257	0.144912	-0.0231598	0.503151
STOX2	-0.215232	0.00327256	0.00587224	0.593885	-0.0310877	0.349291
METTL27	0.568117	-0.00327992	0.0975839	2.19848e-25	0.0508607	0.102694
TSPAN7	-0.621545	-0.00328151	0.0559781	3.76473e-09	0.0447341	0.156382																													x
DTL	0.988944	0.00328461	0.00572608	0.602999	0.0338423	0.301629
TICRR	0.538126	0.00329611	0.00364577	0.745286	0.0906976	0.00176284
ZNF670-ZNF695	0.416369	0.00330916	-0.000788642	0.946066	0.0476175	0.128377
DYSF	0.52202	-0.00332779	0.132931	3.88086e-46	-0.00878394	0.818024
PLPPR3	0.641609	0.00334066	0.0267491	0.00655288	0.024805	0.469937
NPTXR	-0.0137563	0.00334453	0.00632124	0.564672	0.0319128	0.334395
WNK3	0.999914	0.00334453	-0.00813044	0.450219	0.0550801	0.074046
POU4F1	1.01264	0.00335603	0.0224415	0.0244742	-0.0222713	0.523202
ITIH5	-0.0112946	0.00336685	0.00358229	0.748717	0.0343442	0.294326	x																						x
KISS1R	0.9947	0.00336785	0.0123754	0.237296	-0.0181833	0.610884
ALB	0.310536	0.00336908	0.0159102	0.121073	0.0574102	0.0608646																																							x
OR4D1	0.335728	0.00336908	0.00169447	0.881746	0.0801926	0.0063237
PCDHB13	0.222791	0.00336908	-0.0098452	0.35339	0.0654216	0.0300444
KIAA1211	-0.464908	0.00347587	0.00225239	0.840777	0.0195639	0.579868
SIX3	0.798284	0.00347587	0.020893	0.0371146	-0.00766818	0.84018
ALOX15B	0.304709	-0.00348932	-0.0231228	0.020112	0.032467	0.325193					x																																x
DLGAP1	-0.232465	0.00351787	0.00142353	0.900391	0.00676417	0.861436
FRK	0.274124	0.00353579	0.0118958	0.256474	0.0544235	0.0780591															x	x
MAP7D2	0.460633	0.00353579	-0.00221162	0.843428	0.0281612	0.402704
CCL7	4.48176	-0.00355747	-0.0927448	4.83785e-23	-0.125962	7.89601e-06		x																						x	x		x
TMEM151A	0.438999	0.00355934	0.00913987	0.391468	0.0868313	0.00288169
CYP26B1	0.502582	0.00358421	0.00815988	0.448367	-0.0129682	0.726462															x	x
PADI4	0.136481	0.00358489	-0.035979	0.00019883	0.00273606	0.943545
ADD2	0.516354	-0.00358778	-0.100502	7.48682e-27	-0.0362014	0.266407																					x
MYL6	-0.213707	-0.00359242	-0.415029	0	-0.164008	3.24847e-09
SPACA3	1.32813	0.00360621	0.00262052	0.816739	0.0236065	0.493421
PROM1	0.348091	0.00366613	-0.0133813	0.197873	0.0651059	0.0309187
SH3GL2	0.840774	0.00367918	-0.000877285	0.939339	-0.0115606	0.75528																																									x
PIP	0.301015	0.00368044	0.0212792	0.0336377	0.0158977	0.659335
PHGDH	0.693775	0.00370335	-0.111709	6.75963e-33	-0.0471497	0.132613																															x
ARID5B	-0.906827	-0.00370785	0.0469141	9.11914e-07	-0.088841	0.00224207			x																								x
HUNK	0.304152	0.00371554	0	1	0.066166	0.0280011
GPR171	0.0789094	-0.00372194	-0.0157801	0.124416	-0.0124669	0.735338
LAD1	1.32115	0.00377192	0.0258643	0.00873754	0.0173747	0.628244															x
NOX5	0.904241	0.00379679	0.0353026	0.000265409	0.0527813	0.0885684
PARD3	1.33029	0.00379811	0.0182783	0.0711413	-0.0233612	0.49864
OSR2	2.80842	0.00380979	0.047674	5.95935e-07	-0.000652986	0.985457
KCNV1	0.545864	0.00382233	0.0184334	0.0686377	0.0189053	0.595156
TBX3	0.795644	0.00384588	0.0335132	0.000556224	0.00861478	0.820158
TRNP1	0.595046	0.00384588	0.0123038	0.239865	0.0320755	0.331446
CA3	1.00305	0.00385788	0.0272954	0.00546638	0.0305803	0.358127
C1orf116	0.464038	0.00385893	0.0116525	0.266839	0.0813395	0.00555672
COL1A1	1.00978	0.00386493	0.0409057	2.07661e-05	-0.000601199	0.98668														x																				x
ESPN	0.21791	0.00386944	-0.0113645	0.279405	0.0567146	0.0645529
MMP21	0.340813	0.00386944	-0.000887224	0.938797	0.0487058	0.119196
STAT4	1.59249	-0.00388271	0.0120454	0.250063	0.00180816	0.963214		x																									x
PDE4DIP	0.674882	-0.00389406	-0.217176	1.28354e-122	-0.211682	9.05245e-15																																		x
TMEM144	0.0919851	-0.00391039	0.00934584	0.380191	-0.097197	0.00074218
RAX	0.550746	0.00396572	0.0114186	0.277107	0.0122999	0.739348
IL36RN	1.17359	0.00397751	-0.00812646	0.450315	-0.0166683	0.643211
CLDN11	0.707899	0.00398927	-0.00491794	0.658054	0.00335151	0.92986					x
AC064853.3	0.302942	0.00400209	0	1	0.0619781	0.0409963
SLC28A3	-0.285345	0.00400616	-0.0647459	7.7614e-12	0.00743501	0.845287
JCAD	-1.86295	0.00402224	-0.0442397	3.85499e-06	-0.031172	0.347968
ELOVL4	0.668308	0.00405051	0.00575259	0.601344	0.0361519	0.266971
IL2RA	1.90361	0.00406363	0.0184107	0.0690012	-0.0312118	0.347442		x																					x	x
CITED1	-0.589282	0.00406816	-0.00354638	0.750531	0.0229562	0.508187
NEK2	0.547395	0.00408556	-0.00344206	0.756995	0.0803242	0.00622608																		x												x													x
SYNDIG1L	0.0714293	0.00410911	0.00792237	0.462524	0.0649193	0.0314125
KCNG3	1.49678	0.00410943	0.0145613	0.158596	0.0138173	0.708268
LTK	0.710713	0.00412093	0.0190747	0.0588986	0.00787893	0.835765
KNL1	1.28034	0.00413691	0.0513235	7.07123e-08	-0.0213045	0.542945																		x
ANOS1	0.218894	-0.00413933	-0.0696557	1.62233e-13	-0.0756443	0.0105555
DNAH6	-0.00202847	0.00415598	-0.00788938	0.464217	0.0370769	0.253106
CCL1	2.91977	-0.00416319	-0.00693428	0.525909	-0.0567082	0.0645529
TFAP2C	1.46895	0.00416713	0.0246881	0.012638	0.0628624	0.0378888															x	x
PRKAA2	0.719973	0.00418085	0.010768	0.307415	0.0776521	0.00844851																																								x
GUCA1A	0.428215	0.00419484	-0.0688716	3.06233e-13	-0.0179014	0.616074
ZIC2	1.00769	0.00420689	0.00585981	0.594195	-0.0138685	0.707581
MCF2	0.602161	0.0042264	0.00897838	0.400379	0.0423035	0.183042
MACC1	0.548729	0.0042491	-0.0502892	1.31546e-07	-0.058607	0.0551047
FXYD2	2.93443	0.00425006	0.0222314	0.0258991	-0.0680111	0.0233379
SERPINC1	0.0800887	0.00427582	0.0218689	0.0286195	0.0241515	0.483933										x	x												x
KIF5A	0.629313	0.00428887	0.000793565	0.945961	0.0232647	0.501004																						x
MRAP2	0.430185	0.00431219	-0.00444174	0.690602	0.0999149	0.000508521
ACHE	1.295	0.0043207	0.0383153	7.0091e-05	-0.030501	0.358745		x																		x														x
MCOLN3	0.277946	0.00435158	-0.214141	3.57727e-119	-0.134052	1.77167e-06
SLCO5A1	2.43996	-0.00439439	0.0100717	0.341564	-0.00489571	0.89969
BEX1	-0.114027	0.00439779	0.0102504	0.33273	0.0301078	0.365763
PLEKHG6	4.18024	-0.00439947	0.0949523	4.27103e-24	0.00135776	0.971885
C1QTNF1	1.04388	0.00440616	0.0232939	0.0191249	0.0186561	0.600888
MS4A3	0.502564	0.00440871	0	1	0.0780859	0.0080547
DHRS3	-0.365533	0.00441289	-0.147797	7.97317e-57	-0.021647	0.535852															x								x																x
SIGLECL1	0.343409	0.00444253	0.0116296	0.267865	0.0508616	0.102694
PCDH19	0.698881	0.00444657	0.000271742	0.981629	-0.0195559	0.579868
PLA2G2D	1.35525	0.00444713	0.0467671	9.88555e-07	-0.0501365	0.108292
NFKBIA	2.03135	0.00446015	0.141149	6.74758e-52	-0.140604	5.01318e-07																									x		x
TBX2	1.15086	0.00446895	0.0135564	0.191781	0.0599988	0.0490718
KIF14	1.2915	0.00450062	0.0080675	0.453141	0.0265801	0.43353
THBS1	0.743698	0.00452732	0.00309425	0.782105	0.048571	0.120257										x				x
RET	1.80278	-0.0045293	0.0499926	1.56728e-07	-0.0339741	0.300085															x	x
SP9	0.364556	0.00457385	0.0154424	0.13331	0.0635967	0.0353508
HES7	1.60571	0.00457909	0.0500871	1.48211e-07	-0.0170273	0.635086
PLCH1	0.990873	0.00458592	0.0209041	0.0370187	0.0120544	0.744631
IFNW1	4.06027	-0.00459204	0.0393538	4.33932e-05	-0.0137641	0.709619
GPR34	-1.81609	-0.00459796	0.0126421	0.225991	-0.0340168	0.299393
MCM10	0.565706	0.00459897	-0.0136308	0.188964	0.0740226	0.0124962
OR2L3	0.2602	0.00459897	0.00880671	0.410064	0.045376	0.150358
GCSAML	0.923132	0.00460125	0.0056138	0.610587	0.0192536	0.586578
CTNND2	0.817883	0.00462384	-0.00713589	0.512505	0.0464765	0.139341
HRH2	-0.580547	0.00463161	-0.0679309	6.51623e-13	-0.032502	0.324626
KCNJ10	0.52413	0.00463534	0.0116023	0.26888	0.0432336	0.1726
CDKL2	1.09407	0.00464584	0.00691394	0.527231	0.0454741	0.14936
CLIC6	0.328021	0.00465889	-0.000990078	0.93242	0.00727007	0.849506
HOXB2	-0.0648156	0.00466357	0.0143502	0.164864	0.000214754	0.994916
KLC3	0.708705	0.00468376	0.00695004	0.524932	0.0485153	0.120599
LTC4S	-0.390814	0.00470667	0.0888088	3.14424e-21	0.0398481	0.214685	x																x
ADRA2A	0.282504	0.00471858	0.0131952	0.20464	0.0382815	0.235925
DNAJB13	0.151101	0.00471881	-0.00394169	0.726245	0.0998396	0.000513288
FGFR4	0.471126	0.00471881	0.0213871	0.0326572	0.0594618	0.0512521
LARP6	0.691685	0.00471881	0.0188177	0.0625814	0.0589661	0.0534466
TCF15	0.594851	0.00471881	0.00996316	0.347383	0.0728247	0.0142165
DNAH11	1.57924	0.00476777	0.0215949	0.0308565	0.0572306	0.0617415
KLF15	0.726002	0.00477873	0.00121102	0.916059	0.0241028	0.484448
TPRG1	-0.172205	-0.00479506	-0.0449835	2.6032e-06	0.0354354	0.278127
RNF152	1.39756	0.00479973	0.0245663	0.0131166	0.0316387	0.339407
ATP5J2-PTCD1	-0.0823519	0.00480205	0.00969223	0.361427	0.0379548	0.240413
PCSK1N	0.111073	0.00481187	-0.00974658	0.35829	0.00500785	0.898465																													x														x
PCOLCE2	-0.761778	0.0048473	-0.0669445	1.41473e-12	-0.0374314	0.248232														x
HOXD13	0.326872	0.00485296	0	1	0.0541265	0.0798786
HOXD11	0.966168	0.00488552	0.0302552	0.00194826	-0.0151126	0.678712																													x
NUDT11	1.35908	0.00494121	0.0137352	0.18552	-0.0305267	0.358524																												x
GUSB	-0.362146	-0.00496927	-0.308032	1.63879e-251	-0.106326	0.000201297									x										x
MEX3A	-1.03063	0.00497926	0.0116945	0.264982	0.0548517	0.0754628
VWA3A	0.635384	0.00500536	0.00468935	0.672513	0.0488871	0.117682
WNT5A	-1.24832	-0.00507257	-0.0440649	4.22842e-06	-0.0625521	0.0388794														x																					x
NES	-0.0353294	0.0050782	-0.00882012	0.409352	0.00918158	0.808965
EML5	-0.329833	0.00508883	0.023863	0.0161504	0.0381472	0.237544
ACP5	-0.456743	-0.00510232	-0.229402	4.97386e-137	-0.0490705	0.116446																					x
TNFAIP2	1.18041	-0.00512088	0.233936	1.33615e-142	-0.121486	1.7327e-05																											x
ANKK1	0.587113	0.0051252	0.00272758	0.809183	0.0771	0.00898688
WNT9A	0.428494	0.0051252	0.0150859	0.143338	0.0527952	0.0885157
POGLUT1	1.32299	-0.00514228	0.0447015	3.02649e-06	-0.0917641	0.00153519
DMRTA2	1.42423	0.00514503	0.022198	0.0261137	-0.00462962	0.904391
PPEF2	0.297716	0.00516975	-0.000264853	0.981749	0.0655055	0.0298466
FNDC7	0.462052	0.00518511	0	1	0.108927	0.000134999
MROH8	-0.957423	0.00518525	0.00453468	0.683858	-0.0118241	0.749442
CRH	-1.38179	-0.00520334	0.00602614	0.584867	-0.0498116	0.11051
FAM71A	2.44351	0.00524554	0.0298708	0.00223519	0.0323515	0.327282
HOXD1	0.515265	0.00526835	0	1	0.0285533	0.39475
CHAC1	1.06124	0.00529183	-0.0645448	9.0464e-12	-0.0449919	0.154205
VGF	0.220776	0.00531545	0.00875326	0.412742	0.0412202	0.196823
CNTD2	0.412963	0.0053285	-0.00737798	0.496898	0.0338437	0.301629
CHDH	-2.50846	-0.00536075	-0.0465104	1.14e-06	-0.023777	0.490435
GSC	0.405502	0.00536519	0.0294876	0.00256503	0.00869392	0.819218
USHBP1	0.827075	0.0053716	0.0179416	0.0769503	0.00910102	0.810763
NR4A2	2.4008	0.00537315	0.0708849	5.91552e-14	-0.00877183	0.818024																												x
SHISA2	0.969081	0.00537537	0.0180276	0.0754285	0.0594469	0.0512911
CLCF1	-0.553431	0.00539555	0.057361	1.50519e-09	0.0108922	0.770466
PITX2	0.749839	0.00543529	0.0148247	0.150718	0.034814	0.28746																																								x
CTLA4	-0.615653	-0.00543819	-0.0584605	7.13029e-10	-0.065323	0.0303348																							x
RIPOR2	4.55634	-0.00544611	0.0382701	7.15422e-05	-0.0862154	0.00309143
BTC	4.17215	-0.00544791	0.0526852	3.08063e-08	-0.0269023	0.426761																													x
ARTN	0.610462	0.00549521	-0.00839227	0.434088	0.0717895	0.0158493																			x
TMEM130	-0.610061	-0.00552176	-0.137806	1.62719e-49	-0.0728829	0.0141329
CD2	-0.503068	-0.00552954	-0.0390236	5.05418e-05	-0.0945377	0.00106406		x					x
VNN1	0.355648	0.00553854	0.00479097	0.665595	-0.0255917	0.454535																	x
MED12L	3.39285	-0.0055391	0.0856136	8.21559e-20	-0.0440796	0.163679
PPP4R4	0.942935	0.00554363	0.0175416	0.0843962	-0.00164147	0.965947
EPRS	-0.222118	0.00557151	-0.26859	3.02362e-189	-0.0864818	0.00300549
BCL11A	-2.33848	0.00564975	-0.0296622	0.00240804	-0.0474682	0.129654
CYB5D2	-0.461049	0.00567272	-0.0284041	0.00375465	-0.0547977	0.0757374
SGSM1	0.764223	0.00568293	-0.00428774	0.701461	0.0654853	0.0298721
EPHA7	3.36842	-0.00575602	0.0349179	0.000312181	-0.0504027	0.106309
CFAP46	1.0701	0.00575876	0.011311	0.281916	0.0392597	0.222589
BMPR1B	0.392112	0.00577003	0.00451701	0.684828	0.0862614	0.00307814			x														x											x
OVOL1	0.0063407	-0.00580189	-0.0678513	6.92878e-13	0.0214095	0.540728
KCND3	-0.596897	0.00580563	0.0151376	0.141849	0.0376908	0.244535
LYPD3	-0.149355	0.00582823	0.0602611	2.05358e-10	-0.0556538	0.0706811						x																						x
CDKN1C	2.37194	0.00582966	0.157714	1.31916e-64	0.0632342	0.0365833																						x	x
PLAC8	1.25403	0.00587221	-0.0751936	1.47273e-15	-0.0293006	0.381426																						x
S100A16	0.0093996	0.00587639	-0.0573141	1.54943e-09	-0.015128	0.678521
ADCY10	0.127152	0.00592515	0.0122179	0.243326	0.0576007	0.0598143
CDCA7	-1.59299	0.00596748	0.00786107	0.465729	0.0119341	0.747374
RBMS3	0.807345	0.00596985	0.0460081	1.49832e-06	-0.00176871	0.964081
TBR1	0.968497	0.00598507	0.00783113	0.467468	0.0121155	0.743608
SYNE2	1.46643	0.00599077	0.0230869	0.0203212	0.0217521	0.533797
THBD	-2.86035	0.00599298	-0.0142229	0.168759	-0.0546904	0.0763328				x						x
TPPP	0.230125	0.00600839	0.0243175	0.014138	0.00876509	0.818024
FAM169A	0.638009	0.00602044	0.0248656	0.0119598	0.0696225	0.0198624
DUSP4	0.136444	0.00602218	-0.0198066	0.0490812	0.0195897	0.579868
ANKRD18A	-0.979817	0.00602385	0.000971668	0.933701	0.0285654	0.394653
RPL3	-0.400234	0.00604548	-0.443771	0	-0.208026	2.77025e-14
GYPC	0.440574	0.00605278	-0.170164	3.95052e-75	-0.12657	7.05868e-06																					x								x
IGF2	1.19099	0.00608462	0.0202257	0.044227	0.053902	0.0811993																													x
RHOF	-1.27559	0.00613281	-0.165871	2.08398e-71	-0.066805	0.0263159					x																									x
GREM1	0.0675435	0.00613668	-0.000696195	0.952143	0.0644246	0.03288														x
BARX1	1.66044	0.00616664	0.00741403	0.494857	0.0074097	0.845766
SLC2A5	0.747235	0.00621816	0.0278874	0.00448536	0.00782235	0.836603																						x																					x
C12orf50	0.901195	0.00623529	-0.000963306	0.933789	0.0746063	0.0117758
FBXO39	0.636314	0.0062483	-0.00678173	0.536377	0.120028	2.20175e-05
MGST1	-0.460179	0.0062604	-0.249755	5.51409e-163	-0.0869472	0.00284257																																										x
ARHGAP20	1.87404	0.00628808	0.0146588	0.155589	0.00906275	0.811656
IQSEC3	0.659359	0.00632186	0.0459853	1.5163e-06	-0.01385	0.707827
ST8SIA6	-0.808752	-0.00633113	0.0722106	1.94055e-14	-0.0253739	0.458221
KCTD14	4.13231	-0.00635018	-0.0270844	0.0058644	-0.0830654	0.00453846
RNASE10	0.522186	0.00636204	0.0427225	8.46654e-06	0.0400833	0.211686
KLKB1	0.246707	0.00636559	0.00386867	0.731122	0.0363123	0.264742										x	x
C9	0.322929	0.00636814	0	1	0.0403306	0.208488										x	x
TMEM97	-1.04505	0.00637138	0.0250654	0.0112448	0.0112044	0.763459									x																						x		x
SLC43A3	0.688112	-0.00641034	-0.187703	2.14174e-91	-0.108807	0.00013738
RERG	1.80485	0.00641481	0.0375305	9.98731e-05	0.0357364	0.273787
TMEM213	0.876459	0.00642932	-0.00245763	0.827086	0.0357162	0.27402
TNIP3	4.48597	0.00643774	-0.104424	6.77823e-29	-0.10299	0.000328632
RNF165	0.896478	0.00643856	0.0210545	0.0355821	0.105183	0.000239989
VTN	0.325757	0.00644727	-0.0686132	3.7718e-13	0.000446583	0.988968				x
IL3RA	0.7277	0.0064879	0.104748	4.57294e-29	-0.0639602	0.0342739																							x	x
CCNA1	1.21302	-0.00650894	-0.0628797	3.1134e-11	-0.0750019	0.0112958							x									x												x															x
HEATR4	0.13808	0.0065218	-0.0107873	0.306619	0.0530091	0.0871812
SLC26A7	0.720458	0.00653517	0.00189581	0.868172	0.04428	0.161505
AMH	0.139261	0.0065584	0.006485	0.554821	0.109516	0.00012325					x
NEFM	0.956466	0.00658172	0.0223271	0.0252862	0.0530577	0.0868783
CA8	1.29752	0.00659122	0.0327843	0.000745768	0.060186	0.0483123
ABLIM2	1.04277	0.00659222	0.0222819	0.0255716	-0.0246807	0.472046
LAMP5	1.44115	0.00660545	0.0349171	0.000312181	0.0305761	0.358127
TMIGD3	-0.834516	0.00663836	0.0589044	5.25609e-10	0.0310171	0.350423
SLC9A2	0.297362	0.00665401	-0.0109685	0.297841	0.0502496	0.107446
TRPC1	0.7716	0.00666519	0.0179869	0.0761607	0.0595622	0.0508231
IRX2	1.07643	0.00671206	0.0270034	0.00602637	0.0201851	0.566556
ELOVL6	-0.0263837	0.00675948	0.00578611	0.599134	0.0556493	0.0706811	x																														x
RHCG	1.53845	0.00677906	0.0175043	0.0850882	-0.0336885	0.304381						x
PPP1R15B	-0.210978	0.00678163	-0.00306051	0.784234	-0.0467549	0.136469	x
HTRA4	0.781735	-0.00682689	-0.123181	9.0833e-40	-0.127734	5.68153e-06
CYBB	0.771106	-0.00684625	0.0788217	5.60924e-17	-0.102384	0.000359121																									x
SPON2	-0.591141	0.00685531	-0.0567954	2.18669e-09	-0.00127081	0.973199
CLEC1B	0.522668	0.00688031	0.00826012	0.442197	0.0214232	0.540583
TDRKH	-0.60307	-0.00692024	0.137052	5.51984e-49	-0.00675787	0.861436
ABCA6	-0.436453	-0.00693206	0.132877	4.21762e-46	0.00575106	0.882069								x
NR2F2	1.30921	0.00693868	0.0301144	0.00204654	-0.0375746	0.246278
NEGR1	1.04709	0.00696074	0.0374609	0.000102979	0.0179597	0.615391					x
SDC3	-0.525281	-0.00697909	0.155637	6.19572e-63	-0.00800394	0.832786					x														x			x
DHRS9	-1.61091	-0.00698029	-0.1264	8.14056e-42	-0.00712195	0.853198
CHRNA7	0.294891	0.00698579	-0.0143958	0.163566	0.0460696	0.143236
CYGB	-0.189954	0.00698734	-0.0540159	1.33794e-08	-0.00857427	0.820512
OLFML2B	-0.07525	-0.00699628	0.0927858	4.63065e-23	-0.0139438	0.706075
SNAI1	0.45838	0.00705921	0.0451545	2.37719e-06	0.00997435	0.792541
GPX8	1.86548	-0.0070714	-0.0173033	0.0891788	-0.0361698	0.266782									x
CCDC113	-0.270975	0.00707157	0.00233329	0.835525	0.0608813	0.0454871
CCDC140	4.68196	0.00708339	-0.0143904	0.163681	-0.0374462	0.248232
PAX6	1.20636	0.00708357	-0.000207208	0.98553	0.00874188	0.818024																																						x
CD82	0.29682	-0.00718815	-0.285283	2.28256e-214	-0.124798	9.68952e-06																									x												x
TDRD3	-0.786559	0.00718853	-0.263921	1.56734e-182	-0.100863	0.000446206
PDGFB	-1.33945	-0.00720017	0.0638664	1.49715e-11	-0.00819994	0.828205										x	x											x
WTAP	0.593379	0.00721046	0.0547022	8.63977e-09	-0.0493059	0.114437
ATP6V0A4	0.645221	0.00722778	0	1	0.0543678	0.0783017						x
S100A1	-0.118001	0.00723116	-0.0148394	0.150307	-0.0744316	0.0119999										x													x
GP1BA	1.98697	0.0072606	0.0536416	1.69266e-08	-0.0142834	0.698186										x	x														x			x
FAM20C	-1.7423	-0.00726182	-0.223155	1.46666e-129	0.000778459	0.982686
AKR1C3	0.642315	0.00726581	-0.0587608	5.80694e-10	-0.0108261	0.77223
EHF	-2.49064	0.007275	-0.0337469	0.000505932	-0.0641906	0.0335893
LCE5A	1.02589	0.00739645	0.0364286	0.000163249	0.034702	0.289201
MT1G	0.974102	0.00742499	0.0211511	0.0346996	0.021564	0.537372
MYRFL	0.623297	0.00743109	0	1	0.074414	0.0120149
BEX2	0.272497	0.00743482	-0.00939332	0.377689	0.00444025	0.907543
COL27A1	0.616852	0.00744919	0.009981	0.346614	0.077387	0.00870237
SNTG2	-0.693978	0.00747047	0.0106389	0.313222	-0.00688226	0.858492
SLC7A11	-0.583196	-0.00755408	-0.0613375	9.56453e-11	-0.167241	1.53322e-09																					x										x						x
TVP23A	-0.780097	-0.00756592	0.0126676	0.224963	0.0130515	0.725322
PCDHA9	0.756229	0.00765772	0.00630032	0.566078	0.0144238	0.695286
RGS11	-0.271495	0.00767872	0.0358132	0.000213505	0.0116209	0.754285																												x
DDIT4	-0.179223	-0.00770728	-0.103838	1.38495e-28	-0.052875	0.0880589																			x			x									x						x
FCMR	-0.620278	0.00777349	-0.0468334	9.53022e-07	0.000902421	0.980629															x
PLCL1	0.454673	-0.00779908	0.104256	8.30819e-29	-0.00857333	0.820512
AFAP1L1	-0.316085	0.00782821	-0.0411732	1.82367e-05	0.0399477	0.21348
IGFBP6	0.365036	0.00783022	-0.063666	1.73907e-11	-0.00922335	0.80846							x
AC118553.2	1.50324	-0.00783104	0.0604079	1.8559e-10	-0.0499248	0.109584
EXTL2	0.764216	0.00785164	0.00407504	0.71549	-0.0986696	0.00060465
ASNS	0.464874	0.00786189	-0.131369	4.38482e-45	-0.0126882	0.731379																					x										x
SPATA8	0.663619	0.00788672	0.0741896	3.54422e-15	-0.020899	0.552107
OTOF	3.54528	-0.00789351	-0.0784794	7.68515e-17	-0.0932082	0.00127224
HIST1H4H	1.2866	0.0079224	0.0325356	0.000819465	0.0236824	0.491844
FOXC1	3.26242	0.00796857	0.0181622	0.0730714	0.0383051	0.23578															x	x
GDF15	-0.429767	0.00800866	-0.173994	1.53987e-78	-0.155714	2.06471e-08
RCAN1	-0.97595	0.00806174	-0.063896	1.46516e-11	-0.0742056	0.0122617
PAWR	-0.280095	0.0080931	0.0479404	5.12513e-07	0.0162569	0.651236
VCAM1	5.23122	-0.00813872	0.0590418	4.79956e-10	-0.0988117	0.00059437					x									x													x
FREM1	0.717538	0.00814757	0.0113044	0.282139	0.0269826	0.424987
IL36B	2.0161	0.00816151	0.00425123	0.703501	-0.0243505	0.479226
SLC26A11	-1.43532	-0.00824681	-0.16616	1.18005e-71	-0.0777687	0.00834364
USP51	-1.22126	0.00825168	0.041824	1.3223e-05	0.0186979	0.599923
PALLD	-1.81874	-0.00827977	-0.180046	4.3965e-84	-0.0398814	0.21428																														x
GRIP2	1.29071	-0.00828078	0.0122701	0.241214	-0.0199567	0.571595
ABO	1.38879	-0.00829409	0.0299558	0.00216878	0.00559664	0.885602
BAAT	0.326786	0.00832756	0	1	0.119499	2.40878e-05
HYDIN	0.628621	0.00833938	-0.0099232	0.349465	0.092036	0.00148023
TM4SF19	0.0875952	0.00834383	-0.152303	2.7016e-60	-0.0646604	0.0321429
VWCE	-1.42874	0.00835329	-0.0320626	0.00098371	0.0433956	0.170845
DDN	0.869168	0.0083993	-0.00838546	0.434376	0.0994411	0.000542346
RBM11	1.69865	0.00843409	-0.0603683	1.90773e-10	-0.00145317	0.969661
CREB3L1	-0.362536	-0.00846482	0.108458	4.47506e-31	0.0609196	0.0453464
RBP1	-0.0481222	0.00851847	0.0425414	9.27043e-06	-0.000865724	0.9814								x
RPL18A	-0.322003	0.00854395	-0.479018	0	-0.249525	3.37546e-20
TNIP1	0.48015	0.0085768	0.0212374	0.0339849	-0.190469	4.09503e-12
SLC8A2	-0.0743423	0.00862461	0.00234537	0.834771	0.0489185	0.117515
BIRC7	0.327132	0.00870449	-0.00918741	0.389236	-0.00838215	0.824102
MAPK10	0.235519	0.00871835	-0.00347404	0.754809	0.0121459	0.742957																																								x
ZBTB10	-0.79323	0.00872045	0.0455923	1.88033e-06	-0.0186235	0.601584			x
DLL1	2.69841	0.00872727	0.0196989	0.0504642	-0.00291444	0.940002																																			x
SPRED1	-0.848972	0.00872974	0.141111	7.17345e-52	-0.181616	4.3317e-11
ENHO	-0.680089	-0.00873858	-0.0186466	0.0651362	-0.0177047	0.620833
MYH15	2.40833	0.00874426	0.027776	0.00465474	0.0159083	0.659287
SLC20A1	-1.79003	-0.00874665	-0.102494	7.011e-28	-0.109153	0.00013024							x
PLA2G12B	0.459803	0.0087575	-0.0104216	0.324048	0.0869795	0.00283292
IL18	-0.514039	-0.00876915	-0.156803	7.19078e-64	-0.197915	5.24578e-13		x					x																		x
AK8	0.0364188	0.00880827	-0.0130424	0.210351	0.0170791	0.634394
CCL15	1.28649	0.00881396	0.0126942	0.223985	0.100742	0.000453577
SYDE2	-0.78334	0.00884447	-0.0317447	0.00111264	0.0247678	0.470262
PPIC	-0.232349	0.00900478	-0.179571	1.20564e-83	-0.0274381	0.417009
PCDHA10	0.719793	0.00900745	-0.0058229	0.596668	0.0429525	0.175575
CD300E	1.70294	0.0090222	0.0842203	3.27193e-19	-0.0499299	0.109584
DYNC2H1	-0.283075	0.00909478	0.00925665	0.385398	-0.00612706	0.873851
AKR1C1	-0.205724	0.00910127	-0.0362134	0.000179332	-0.00167381	0.965705
FST	0.0923301	-0.00915361	0.00602142	0.585016	0.00933753	0.806402																																		x
CAMK1	-0.435748	-0.0091752	-0.144649	1.83933e-54	-0.0849647	0.00359737
CACNA1D	-0.643852	0.00922774	0.147757	8.53925e-57	-0.0750163	0.0112858
CCR6	0.351967	-0.00923346	0.0971476	3.6112e-25	0.0179302	0.61563
HIST1H3D	-0.515634	-0.00927051	0.0356605	0.000227754	-0.0866732	0.00293781
ADAMTS17	0.814942	0.00928118	0.0191911	0.0571932	0.0652511	0.030542
TRIB3	-1.64199	-0.00929395	-0.0855297	8.93238e-20	-0.0578405	0.0587814									x																						x						x			x
HBEGF	2.69155	0.00931924	-0.15306	6.88712e-61	-0.0143663	0.69651																									x				x					x			x
TFCP2L1	-0.428198	0.00934142	-0.00104802	0.928337	0.0148201	0.685683								x																				x
SPRED3	0.304943	0.00938952	0.0037096	0.741371	0.0927617	0.00134897
DIP2C	-0.458898	-0.00939904	0.0536773	1.65568e-08	-0.00619595	0.87287
C12orf45	-0.563688	-0.00940411	-0.149131	7.75217e-58	-0.0606216	0.0464432
MYH11	1.43819	0.00941195	0.0297858	0.00230347	0.0291281	0.384677																																		x
TRAM2	-1.24066	0.00945089	0.0741511	3.6627e-15	-0.0906026	0.00178455
AHNAK2	0.698315	0.00947873	-0.0107764	0.307084	0.0500301	0.10894
CPEB1	-2.19665	0.00948003	-0.0196312	0.0512553	0.0354576	0.277853
RAB3IL1	-1.95066	0.00949639	0.0446859	3.04904e-06	-0.0194901	0.581262
PLOD2	2.49983	0.00952355	0.0320121	0.0010025	0.0503237	0.106832														x					x												x
RAB3B	0.574613	0.00955245	0.00877244	0.411649	0.0180625	0.612885
CST6	0.0843238	0.00955319	-0.108625	3.63113e-31	-0.0868673	0.00287048
DNAJB5	-0.525643	0.00957726	0.0384003	6.74402e-05	-0.00661258	0.863765
OSBPL6	2.5499	0.00960456	0.0357481	0.000219569	0.00153228	0.967928
TNC	1.44599	0.00963596	0.00369933	0.741796	-0.0706853	0.0178247														x
TMCC3	3.0617	-0.00964524	0.0476147	6.16063e-07	-0.0693088	0.0204993
HOXB6	1.84512	0.00966325	0.0265049	0.00711206	-0.0193714	0.58393
ABCA9	-0.133837	0.00967112	0.0684207	4.40457e-13	0.0262959	0.439814								x
MT1A	2.7343	0.00968211	0.0555584	4.95627e-09	0.0102103	0.788205
PTGIR	1.93771	-0.00969615	0.202427	2.24659e-106	-0.212019	8.16031e-15																									x
FGF13	0.329203	0.00972601	0.0780123	1.18063e-16	0.0162228	0.651724																																					x
PDSS1	-0.0853232	0.00972928	-0.0349765	0.000304851	-0.0987559	0.000598139
ACSM5	2.15363	0.00973698	0.216268	1.38879e-121	-0.0732662	0.0135548
COTL1	-0.538888	-0.0097946	-0.37377	0	-0.152174	4.51408e-08
C1orf228	0.091421	-0.00981179	-0.1283	4.76024e-43	-0.10987	0.00011665
CALCRL	-1.28962	-0.00981388	-0.00418663	0.707387	-0.0217563	0.533797																									x
MOBP	0.684511	0.00982045	0.0120284	0.250767	0.114914	5.20892e-05
HERC5	5.61894	0.00986665	-0.0902638	6.86343e-22	-0.00498099	0.89863
GUCY1A3	2.35366	-0.0098691	0.0575528	1.32329e-09	0.00989919	0.793986
RPS6	-0.394007	-0.0098695	-0.398879	0	-0.264188	1.33005e-22																																x
GIPC2	1.05995	0.00987914	0.00421766	0.705808	0.0874816	0.002663
PHLDA3	-1.05064	0.00989377	-0.341171	7.3912118356983e-312	-0.0757853	0.0103973																																					x
NPW	-0.152241	0.00990264	-0.0324039	0.000862584	0.00520446	0.893013
ELAVL3	0.710849	0.0099055	0.0390906	4.90366e-05	0.0959927	0.000876128
FEZ1	1.29237	0.00999667	0.0105078	0.319997	0.0706295	0.0179086							x
NFIA	-1.16506	-0.0100012	0.0503594	1.26188e-07	-0.0969826	0.000764502
IFNE	3.78007	-0.0101156	-0.00112959	0.921878	-0.0490453	0.116623
FMNL3	-0.403702	-0.0101331	0.0331375	0.000647137	-0.118859	2.69006e-05
GPR132	0.197329	-0.0101676	0.102905	4.27878e-28	-0.118468	2.8731e-05																									x
TRPV3	-0.15923	0.0101882	0.00618509	0.574077	0.0959539	0.000879127
GPR88	0.803844	0.0101905	0.0243021	0.0141915	0.0562747	0.0670463
NFXL1	-1.22323	0.0102174	0.030733	0.00163021	-0.158037	1.24811e-08
NCAPH	-1.64485	-0.0102405	-0.147339	1.77095e-56	-0.0977212	0.000691606																																											x
TSPAN15	-0.0143464	-0.0102615	0.120778	2.86613e-38	0.0304608	0.359288
CA2	-0.802812	-0.0102643	-0.167148	1.67583e-72	-0.0724968	0.0146913											x					x	x				x		x						x
HOXC9	1.57311	0.0102715	0.0423914	9.98658e-06	-0.0407721	0.202811
SP8	1.47946	0.0102729	0.0341975	0.000420065	-0.0107219	0.774289
ZNF365	0.281401	0.0102922	-0.0899542	9.49658e-22	-0.0968216	0.000780493																																					x
PCDHGA8	1.34823	0.0102955	0.014983	0.146103	0.0171161	0.634394
KIAA1147	-0.70253	-0.0103058	0.112484	2.44486e-33	-0.0517919	0.0957918
GRAMD1B	2.54173	0.010308	0.0611679	1.08108e-10	-0.0664341	0.0272555
PAK3	1.1902	0.0103434	0.0346696	0.000345222	0.0525829	0.0899117																																						x
SLIT2	2.75312	0.0103486	0.0200521	0.0461742	-0.0402412	0.209734					x									x
RORA	-0.300391	0.0103658	0.117189	4.28927e-36	-0.00901311	0.812904																						x	x
ANGPTL4	2.03623	-0.0104615	0.0812524	5.75599e-18	-0.0411553	0.197557	x																		x			x							x
PRLR	2.99439	-0.0104672	0.117246	3.96921e-36	-0.0517017	0.0964295																x
SCG2	0.198466	0.010477	-0.00454143	0.683547	0.118708	2.75985e-05														x						x
CHIC1	0.706347	0.0105559	0.0301319	0.00203421	0.00201572	0.959555
NFIX	2.53213	0.0105628	-0.0145713	0.158329	-0.0606538	0.0463281
CLEC11A	-0.342667	-0.0105661	-0.148429	2.65259e-57	-0.0382264	0.236719
GEM	2.1799	0.0105836	0.00790535	0.463352	0.00124556	0.973199														x
SYNE1	-0.475989	-0.0106299	-0.0277186	0.00474174	-0.0665497	0.0269621
OCSTAMP	-0.696863	0.0106759	-0.0598153	2.8019e-10	-0.12204	1.58491e-05
SLC9A4	0.719285	0.0108447	0.0316446	0.00115413	0.0559213	0.0691045
ITGA2B	0.249611	0.010858	-0.0204859	0.0413559	0.0401238	0.21121
ITLN1	1.64925	0.0108603	-0.00225867	0.840527	0.0304686	0.359288
GPAT2	-0.246223	0.0108688	-0.0681686	5.39053e-13	-0.00912413	0.810345
TREML4	0.920229	0.0108827	0.0310737	0.0014327	0.0092347	0.80841
HGD	0.272869	0.0109002	-0.00230048	0.838076	0.0840049	0.0040376
CCR2	-2.79271	-0.0109018	-0.0602537	2.06281e-10	-0.0878466	0.00253985		x
C3orf70	0.481023	0.0109764	0.0298368	0.00226253	0.0489665	0.117113
HLA-DQB2	0.432526	0.0109891	0.138391	6.26895e-50	0.0259308	0.447138
TNFRSF8	-0.33254	0.0110607	0.0329543	0.00069668	0.0325279	0.324249																							x
C10orf10	1.61459	-0.0111722	0.0569447	1.98259e-09	-0.0762953	0.00981664
IFNA14	2.01073	0.0111794	0.044997	2.58593e-06	0.0417227	0.190611
ICAM4	0.269887	0.0112076	0.0611623	1.0846e-10	-0.0120575	0.744631					x																x				x
HIST1H2AE	0.110458	0.0112728	0.0140345	0.175268	0.0115195	0.756264
MACF1	0.522474	0.0112806	0.250275	1.11133e-163	-0.131156	3.07006e-06
IL12A	3.8598	0.0113475	0.0539275	1.41319e-08	-0.0175235	0.625145		x
CLU	0.773894	0.0113534	-0.0321605	0.000947666	0.00487145	0.899797							x		x	x	x																							x
INHBA	2.27929	0.0113767	-0.153158	5.76944e-61	-0.329128	2.89663e-35		x												x											x				x
CLDN1	1.81902	-0.0113979	0.0422247	1.08552e-05	0.0162234	0.651724
TFPI2	1.58135	0.0114457	0.0455221	1.95149e-06	-0.0210502	0.548636										x	x			x		x
IL2RG	0.283561	0.0114712	-0.213725	1.04603e-118	-0.121704	1.67625e-05		x				x																		x					x											x
DUSP1	-1.14964	-0.0114825	0.0443159	3.70871e-06	-0.0920831	0.00147185																						x
HIST1H2BN	-1.06568	0.0115349	0.03938	4.28777e-05	-0.0278766	0.408358
FBN1	0.576188	0.0115497	0.014906	0.14828	0.0721666	0.015226					x					x				x
GPC4	0.0527953	0.0115775	-0.0456536	1.81935e-06	0.0199172	0.572233																			x			x
NPHS1	0.751004	0.0115778	-0.0137292	0.18567	0.0136431	0.71236																												x
GPD1	-0.485742	0.0116094	-0.0760952	6.6558e-16	-0.00378917	0.920959																	x
BCAT1	0.230597	0.0116752	-0.227009	3.84022e-134	-0.116955	3.69717e-05		x																													x
CXCR2	-2.96508	-0.0116892	-0.11998	8.83155e-38	-0.0750454	0.0112654
HSPA6	-0.478461	0.0116947	0.0491569	2.54902e-07	-0.0429995	0.175437
ULK2	-1.04758	0.0117595	-0.0632204	2.4174e-11	0.00626172	0.871237
CFH	1.3696	0.0118989	0.173602	3.45354e-78	-0.0286281	0.393367										x	x																x		x
GLA	-0.176224	0.0119055	-0.231058	4.78609e-139	-0.110377	0.000107731															x	x															x										x
KRT17	-0.136176	-0.0119296	-0.0711527	4.72887e-14	-0.0322653	0.328599																																					x
NOSTRIN	1.25501	0.011943	-0.00436653	0.69545	0.042446	0.181754
FOSB	0.127204	0.0120098	0.210371	5.68486e-115	0.0908364	0.00173407
BPI	0.41114	-0.0120514	-0.106222	7.40381e-30	-0.0514918	0.0979038
BEST3	0.558696	0.0120664	0.00190889	0.867441	0.0424407	0.181754
GCLM	-0.294091	-0.0120822	-0.0157461	0.12532	-0.0798332	0.00660168								x													x																					x
STON2	1.17018	-0.0120939	0.11569	3.33122e-35	0.00540387	0.889682
CACHD1	1.13514	0.0121023	0.0176522	0.0822199	0.0205668	0.558564
CD180	-1.34201	-0.0122154	0.0812842	5.59367e-18	-0.0384102	0.234654
BHLHE41	-1.58361	-0.0122207	-0.133774	1.03788e-46	-0.0578231	0.0588292
TACSTD2	-0.204648	-0.0123108	-0.0964364	8.09169e-25	-0.0483814	0.121296
CDH2	-0.276717	-0.0123463	-0.0298859	0.00222508	0.0401394	0.211084														x
MAP1A	-0.904808	0.0123493	-0.0306745	0.00166624	-0.0495936	0.112093
DDX43	0.801387	0.0123708	0.037816	8.78417e-05	0.0775575	0.00853179
DEFB1	6.36505	-0.0123738	0.134357	4.12753e-47	-0.0841537	0.00396731
MYL9	-0.0528741	0.0123831	-0.241084	1.24762e-151	-0.0849489	0.00360163					x									x
PLIN5	1.41863	0.0123863	0.0279572	0.00438093	0.023653	0.492406
PLD4	-0.637664	-0.0124006	-0.105243	2.48852e-29	-0.0238935	0.488003
FNDC5	-0.340989	0.0124711	-0.031221	0.00135609	0.00439138	0.908532
CYP2W1	2.07463	0.0125583	0.0153136	0.136746	0.0386542	0.231188
HRASLS2	4.59451	-0.0125818	0.0253396	0.0103318	-0.0620492	0.0407614
ADAM23	-1.0838	-0.0126075	0.0523005	3.90655e-08	-0.00389352	0.918393					x
JAKMIP2	-1.07188	0.0126085	-0.193995	1.20958e-97	-0.183258	2.80693e-11
FOXL2	1.5215	0.012626	0.0412533	1.75662e-05	0.0626202	0.0387309
HGNC:24955	0.384143	0.0126631	-0.00586249	0.594195	0.104691	0.000256314
NBPF19	-0.660345	0.0127015	0.0327057	0.000769037	-0.118018	3.09225e-05
ISYNA1	-0.548991	-0.0127035	-0.0114613	0.275288	0.00847103	0.822631
IGF1	1.53259	0.0127125	0.0973404	2.89844e-25	-0.0239345	0.487137																																		x
CLEC2D	-0.244493	0.012804	-0.038444	6.61987e-05	-0.0829236	0.00461786
SCN3A	1.67895	0.0128273	0.0260605	0.00819454	0.0332093	0.311376
HSPA12A	1.79703	0.0128275	0.0195217	0.0526879	0.116794	3.79368e-05
NPB	0.10463	0.0129267	-0.0326318	0.000791464	-0.0355274	0.276831
SHOX2	1.58104	-0.0129612	-0.0486561	3.4068e-07	0.00365971	0.923553																												x
SPRED2	-0.1936	0.0129975	-0.0634174	2.09201e-11	-0.0302441	0.363107																							x
RTL9	1.56545	0.0130407	0.0523118	3.88169e-08	0.0223265	0.522381
IFNA8	3.13195	0.0130551	0.0595758	3.31022e-10	0.0370315	0.253504
FAM83D	0.586484	0.0130975	0.018973	0.0603266	0.0914064	0.00161072
SCD	-0.405822	0.0131106	-0.179197	2.68487e-83	-0.12805	5.38572e-06			x						x																						x			x
G0S2	0.967617	-0.0131573	-0.0481398	4.57184e-07	-0.10078	0.000451422																	x												x
LRRC32	2.8715	0.013241	-0.00615792	0.575637	0.021253	0.544146
FAM184A	1.11989	0.01326	-0.00684105	0.532512	0.065004	0.0311813
TCN2	0.99361	0.0132967	0.139499	1.02745e-50	-0.0190847	0.59121																																					x
DUOXA1	-1.43884	-0.0133549	0.0394678	4.11621e-05	0.0112377	0.76326
ANK3	1.78041	0.013455	0.0541955	1.19336e-08	0.026754	0.429622
CD163	2.30716	0.0134821	0.224452	4.34742e-131	0.0239888	0.486653
ZDHHC11	0.923423	0.0135206	-0.0156193	0.128775	0.14497	2.06003e-07
LRRC75A	-0.731958	0.013637	-0.113813	4.19543e-34	-0.0186109	0.601615
TNFSF14	-0.592309	-0.0136488	-0.161966	4.19416e-68	-0.131667	2.7972e-06
CD70	2.86743	0.0136598	0.0574581	1.41076e-09	-0.00547532	0.887982																									x
DNAAF1	3.79725	0.0137135	0.0137184	0.185999	-0.069124	0.0208725
RAB33A	-2.64006	-0.0137486	-0.101945	1.35272e-27	-0.0335045	0.307447
PLS3	2.66333	0.0137947	0.0401297	3.01288e-05	-0.0103353	0.784863
ADTRP	0.288334	-0.0138058	-0.131911	1.90066e-45	-0.100211	0.000487668
WEE1	-2.11077	0.0138074	0.0353346	0.000262071	0.112932	7.14111e-05							x						x
NBL1	0.561072	0.0138498	0.036974	0.000128299	0.0131764	0.722324															x	x
PDGFC	-1.5409	0.0138811	0.0628407	3.20276e-11	-0.0501144	0.108292																								x
SERPINE1	0.192913	0.013896	-0.230577	1.8462e-138	-0.189803	4.86633e-12										x	x			x								x			x
USP44	0.80942	0.0139649	0.0219554	0.027954	0.0989944	0.00057888
RGCC	-1.23642	0.014147	-0.238455	2.82706e-148	-0.0524386	0.0909515
FAM71F1	0.960798	0.0141692	0.0112753	0.283401	0.148644	9.55828e-08
DNAJC5B	-0.289365	0.0141882	-0.158322	4.24068e-65	-0.167221	1.53426e-09
IL1A	3.55182	0.0142098	-0.0312585	0.001338	-0.146443	1.52172e-07							x																		x												x
RPS3	-0.359121	-0.0143418	-0.426956	0	-0.222015	3.67824e-16																																x
CEACAM8	-0.0780969	-0.014383	-0.0915345	1.7744e-22	-0.0309944	0.350423
MYMX	2.00556	0.0145237	0.0790884	4.37961e-17	0.00421079	0.911848
JAM2	0.314048	0.0145964	0.0150643	0.143954	0.0262496	0.440567
TMOD2	-0.011019	-0.0146539	0.0937066	1.69447e-23	-0.0936877	0.00119743
CCL24	0.646632	0.0146672	0.0821521	2.43994e-18	0.109806	0.000117751																									x
GFPT2	1.07591	0.0147317	0.00102679	0.929865	0.100304	0.000481844																													x
RPS23	-0.309207	-0.0148187	-0.400642	0	-0.255577	3.59469e-21
FLT4	2.03358	0.0149173	0.0145337	0.159467	0.0362296	0.266109																													x
SETDB2	-0.765691	-0.0149252	-0.0295812	0.00247936	-0.154128	2.9437e-08
ODF2L	1.04832	-0.0149423	0.204138	3.38595e-108	0.00560886	0.885541
ONECUT2	1.08242	0.0149926	0.0323157	0.000891602	0.0213541	0.541798
ITGB8	0.57482	0.0150056	-0.000963928	0.933789	-0.0908902	0.00172606																									x
IER5	-0.375501	0.0152102	-0.0958206	1.61995e-24	-0.0965297	0.000811479																																					x
FAM60A	-0.0525703	-0.0152421	-0.0215844	0.0309332	-0.107665	0.000164008
MT1E	1.45832	-0.0153096	-0.0864208	3.6459e-20	-0.0593036	0.0518323																						x
EBI3	2.99666	0.0153185	0.0644871	9.43078e-12	0.00487156	0.899797																								x	x
TWIST1	2.65213	0.0153551	0.00714823	0.511791	-0.0271844	0.420834
EPHA4	1.54755	0.0154482	0.0290341	0.00301222	0.0846802	0.00372389
LHX1	2.25776	0.0154828	0.035493	0.000244751	-0.0349955	0.284865
CD276	-0.320403	-0.0154944	-0.179895	6.0765e-84	-0.0986135	0.000608533					x
POU3F1	-0.806094	0.0155105	-0.00925552	0.385398	0.111739	8.62165e-05
SLPI	1.18101	0.0155169	0.0352966	0.000265943	-0.0367817	0.257122																													x
EFHD1	1.68965	0.0155473	0.0633414	2.2113e-11	0.0303665	0.360862																												x
IFNL3	2.81349	0.0155658	0.0569401	1.9872e-09	-0.0442234	0.161942
SEMA3B	0.507271	0.0156613	-0.00177381	0.876062	0.104766	0.000253834									x						x	x													x
COX7A1	1.10733	0.0157406	0.0745292	2.63986e-15	0.00958903	0.80207																																		x
RPL13A	-0.45496	-0.0157662	-0.377027	0	-0.236328	3.20271e-18
KIAA1683	-1.38409	0.0158217	0.00696599	0.524347	0.0851804	0.00350944
BMP2	1.47108	0.0158226	0.0462832	1.2896e-06	0.0833543	0.00438052							x																x						x								x
MDH1	-0.556987	0.0158323	-0.413869	0	-0.130228	3.63303e-06																	x		x																	x
IL17RB	-0.131117	-0.0159788	-0.143012	2.97693e-53	-0.0701877	0.0187268															x	x								x
ZDHHC14	0.5482	0.0160088	0.108537	4.05805e-31	0.0429998	0.175437
CLGN	0.726917	0.0160148	-0.0324543	0.000845769	0.0718122	0.0158209																																											x
MMP25	0.164878	-0.0160245	0.0987579	5.70982e-26	0.0136883	0.711386
TMEM25	0.636732	0.0160429	0.00905588	0.395879	0.0858141	0.00324561
LRP2	1.9309	0.0160922	0.0590234	4.85431e-10	-0.0144874	0.694177
PAK5	-0.283492	-0.0161799	0.148967	1.03233e-57	-0.0272587	0.41981
CGNL1	2.90584	0.016286	0.00806066	0.453258	-0.0392971	0.222148
HMGCS1	-0.0639728	-0.0163201	-0.0225531	0.0237408	-0.0956099	0.000921841			x						x								x														x
TRIM72	-0.29991	0.0163553	-0.0155665	0.130196	0.120991	1.87621e-05
CABP5	1.48718	0.0164988	0.0159208	0.120838	0.0289774	0.387022
TRIB1	-1.61027	-0.0165349	0.0138913	0.180098	-0.102996	0.000328632																													x
SEMA6B	0.0399787	0.0166537	0.00471985	0.670732	-0.0152386	0.676262
CEACAM1	3.35976	0.0166757	0.0722647	1.85466e-14	-0.0172338	0.6319
CRHBP	2.23239	-0.0166861	0.190204	7.49298e-94	-0.0853038	0.00345606
SPRY2	0.164035	0.0168111	-0.0311567	0.00138803	-0.0531348	0.0863754																													x
TMEM37	-2.70618	-0.0168795	0.122865	1.43382e-39	-0.0134486	0.71654
SELL	3.54565	-0.0168874	0.126687	5.32156e-42	-0.0630451	0.0372168																							x		x	x
CCL19	2.74797	0.0169006	0.033921	0.000470715	0.0313696	0.344528		x
FGFR3	0.81901	0.0169051	0.00668327	0.541977	0.107559	0.000166465																x												x
FYB2	1.70906	0.0169171	0.0318905	0.00105152	0.0472143	0.132149
SMPD3	1.97628	0.0169682	0.0766211	4.16985e-16	-0.00828593	0.826134
ZNF667	-1.73227	0.0169863	-0.00828883	0.440414	0.0673566	0.0249161
ZNF704	-1.79329	0.0170031	0.0619452	6.16744e-11	0.00415947	0.913109
SERINC5	-1.49177	0.0170068	-0.176179	1.6197e-80	-0.0742967	0.0121417
SPARC	0.150369	-0.0171569	-0.191803	1.91643e-95	-0.0812734	0.00559053										x				x																				x
HOXD10	1.68276	0.0171637	0.0268416	0.00635974	0.0359852	0.269607
IL1R2	0.55583	-0.0171928	0.174817	2.80029e-79	0.0572574	0.0616265																							x	x
ARL9	0.64879	0.0172077	0.0590021	4.92378e-10	0.0934909	0.00122796
CNKSR3	-0.0415235	0.0173162	-0.0138989	0.179895	0.0141527	0.701352
ST8SIA5	0.625855	0.0173821	0.0182426	0.07174	0.11219	8.04655e-05
SYDE1	1.79466	0.0175345	0.0515472	6.18033e-08	0.0272483	0.419865
PLA2R1	-0.0449224	0.017537	-0.00244753	0.82738	0.0405521	0.20568
AXL	5.78438	-0.0175402	0.0676976	7.82393e-13	-0.0515792	0.0972211																									x
PSAT1	0.296381	-0.0176432	-0.152026	4.44162e-60	-0.042824	0.177112																															x
CEBPA	-2.95153	0.0177556	-0.174486	5.55824e-79	0.0233968	0.498133																																					x
AOC3	-0.341259	0.0178251	-0.0119356	0.254776	0.168203	1.2192e-09																	x
PTGER3	-0.724844	0.0178991	0.0346337	0.000350278	0.048057	0.124463	x															x
ZBTB38	-0.308781	0.0179113	-0.0337126	0.000512648	-0.160243	7.69259e-09
SLC17A8	0.861291	0.0179447	-0.0100819	0.341251	0.14547	1.85776e-07
MT-CO3	-0.0980055	-0.0180018	-0.330073	8.27052e-291	-0.20514	6.56369e-14
NFATC2	-2.0847	-0.0180241	0.0534908	1.86118e-08	-0.0342766	0.295499
DND1	0.365914	0.01808	-0.00912543	0.392071	0.00494453	0.89863
CRYBB1	1.12697	0.0181665	0.0984572	8.08808e-26	0.0475934	0.128555
RGS16	2.34658	0.0181948	0.0414472	1.59602e-05	0.0620743	0.0406871																							x		x				x								x
HSPB9	3.63081	0.0182193	0.0313914	0.00127225	0.0220961	0.527095
OGFRL1	0.112455	0.0182381	0.0156678	0.127499	-0.0548085	0.075712
CD163L1	0.984161	0.0182967	0.149806	2.34965e-58	0.0796132	0.00676703
EGR4	0.403852	0.0183348	0.0295807	0.00247936	0.0539597	0.0808298
MYO7A	0.222421	0.0184371	0.11967	1.36661e-37	0.0540978	0.0800343
ALDH1A1	1.16759	-0.0185144	-0.059608	3.23802e-10	-0.138378	7.7571e-07								x									x																						x
USP27X	0.39942	0.0185254	0.0619411	6.18119e-11	-0.0350585	0.283809
NCKAP5	-0.433428	-0.0185665	-0.0191148	0.058315	0.00894374	0.814464
CDK6	-1.22281	0.0186326	-0.0404859	2.54199e-05	0.00774055	0.838228			x																	x
KCNN1	2.0818	0.0186353	0.0795312	2.91044e-17	0.0461443	0.142545																												x
BASP1	-0.252674	-0.0186357	-0.251814	9.50853e-166	-0.0582944	0.0565536														x
PMP22	-1.31142	0.0187866	-0.00485455	0.661335	0.00434788	0.909554														x
SCN1B	0.150065	0.0188126	0.00808947	0.451997	0.000848066	0.981597																									x				x
SULT1C2	1.48784	0.0188406	0.0573893	1.47753e-09	-0.0497141	0.111293
GAS6	-0.211519	0.0190427	0.113508	6.28858e-34	-0.0332919	0.310485
RETN	0.10051	-0.019121	-0.108204	6.16579e-31	-0.0288623	0.389192	x																												x
CMBL	-0.389963	0.0191634	0.0426006	8.99793e-06	0.021594	0.536774	x
HPSE	3.33578	-0.0191851	0.141274	5.48455e-52	-0.0318369	0.335509
GPR35	-1.4225	-0.0191881	-0.164056	7.31626e-70	-0.0783064	0.00786061
GRAMD1A	-0.143632	0.0191971	-0.178293	1.84079e-82	-0.1863	1.24921e-11
ADAM12	-1.28518	0.0192124	-0.0325597	0.000812483	-0.00984451	0.795092														x																				x
CLIC2	-0.400321	0.0192542	0.188422	4.24942e-92	0.0249128	0.468209																					x
ICAM5	-1.29769	0.0193746	0.00371383	0.741364	-0.00563984	0.885217					x
SELENOM	0.111351	0.0194442	0.0506966	1.03356e-07	0.0642891	0.0332725
CAMK1G	1.20884	0.0194884	-0.0369241	0.00013115	-0.0921416	0.00146117
LIMCH1	1.40429	0.0195001	0.0169201	0.0972186	0.0752196	0.0110632
NRARP	-0.831564	0.0195915	0.0325683	0.000810626	-0.0183196	0.608427
C6orf141	4.70178	0.0196758	-0.00667996	0.54202	0.00469938	0.902617
AREG	3.41962	0.019681	-0.00788781	0.464217	-0.00663544	0.863367														x	x	x
ADRA2B	-1.46409	0.0197219	-0.0116263	0.267915	0.105137	0.000241459											x
TNFRSF11A	-0.752679	-0.0197905	-0.126015	1.44386e-41	-0.0280101	0.405737
AOC2	0.363443	0.0198888	-0.00447172	0.688351	0.138467	7.63789e-07
HMMR	1.86683	0.0199373	0.0753859	1.24576e-15	0.0246465	0.472544													x					x	x
DDR2	1.08921	0.0199885	-0.00108444	0.925488	0.0865587	0.0029776
INAVA	2.71681	-0.0200295	0.0426299	8.86898e-06	-0.0247967	0.469938
CD37	-0.222008	-0.0201068	-0.216761	3.81942e-122	-0.177707	1.18536e-10																													x
PLTP	0.792115	0.0201689	-0.0815152	4.48979e-18	-0.0811246	0.00568966
FCN1	-0.13634	-0.020194	-0.127376	1.90335e-42	-0.0983447	0.000632853											x
METRNL	-1.12839	-0.0202194	-0.192275	6.55937e-96	-0.0883385	0.00239173
BTG3	1.91144	0.0202337	-0.112457	2.52821e-33	-0.0822125	0.00502213							x									x
AOC1	-0.303811	0.0202431	0.0550953	6.71513e-09	0.0339304	0.300342
UCHL1	0.2583	0.0202851	-0.133629	1.30201e-46	-0.0458532	0.145322
NXN	1.15907	0.0203316	0.0128704	0.21691	0.0258709	0.448265
SLC25A23	-0.377741	-0.0203778	0.0121003	0.247785	-0.0347657	0.288241																												x
NKD2	0.597232	0.0204409	0.0154767	0.132476	0.0674572	0.0246663
HS3ST1	-4.10119	0.0204913	0.00986513	0.352778	-0.0037124	0.922645																						x
ASPM	0.924482	0.0205687	0.00949741	0.372149	0.0894049	0.00208151
CBFA2T3	-1.20998	0.0206141	-0.0276987	0.00477238	-0.0748107	0.0115432															x
HIST1H1C	-1.19438	0.0207072	-0.0250705	0.0112324	-0.00627949	0.871237
PKIB	0.00452997	-0.0207452	-0.0642293	1.14416e-11	-0.0248621	0.46884
MPEG1	1.05358	-0.0207911	0.314719	4.37085e-263	-0.0277759	0.410588
ZDBF2	0.184844	0.020843	0.0262377	0.0077355	0.0576283	0.0597631
PLAGL1	1.20961	0.0208828	0.109363	1.42287e-31	-0.0757039	0.0104896																							x
SLC35F3	-1.77551	-0.0209596	0.0251141	0.011081	-0.0349759	0.285093
TBX1	2.23357	-0.0211402	0.0116894	0.265123	-0.0300023	0.367603
OSBPL10	1.24874	0.0212364	0.093613	1.87684e-23	0.0187295	0.599255
S100P	0.508864	-0.0212478	-0.107688	1.18601e-30	-0.0253062	0.459748
NCF2	-0.85418	-0.0212669	-0.353415	0	-0.171495	5.53118e-10
RPL19	-0.347407	-0.0213135	-0.439151	0	-0.258621	1.12315e-21
CORO1A	-1.3854	-0.0213244	-0.183156	5.20039e-87	-0.076167	0.00995177																															x
GJB2	0.62482	0.021396	-0.0468779	9.30052e-07	0.0182722	0.609048
AL161669.4	0.963178	0.0214432	0.0180471	0.0750974	0.0128594	0.728206
MT1X	-0.107008	0.0214524	-0.0687816	3.29242e-13	-0.0447435	0.156356
TNFSF18	4.64791	-0.0215813	0.0917142	1.46301e-22	-0.0739641	0.0125715
CDC42EP2	0.647509	0.021665	0.0835898	6.06351e-19	0.00705282	0.854376																														x
EBP	-0.724716	0.0217205	-0.267845	3.64603e-188	-0.0888013	0.00225003							x		x																						x
C5AR2	-0.581119	-0.0217275	-0.0496244	1.94396e-07	-0.0617118	0.0420779
FAIM2	-0.160849	-0.0219795	-0.123236	8.39616e-40	-0.0803597	0.00620377
YPEL5	-0.961568	-0.0222993	-0.00129448	0.909743	-0.0596534	0.0504774																					x
HOXB9	1.8707	0.0223596	0.05633	2.97782e-09	-0.0655918	0.0295987																						x
GIMAP5	0.249544	-0.0223843	0.0720521	2.21731e-14	-0.0309595	0.350894
SCARB1	-1.08806	0.0224923	0.135417	7.64262e-48	0.0581593	0.0571735	x														x	x						x
PAX8	-0.0808857	-0.0226416	-0.0104419	0.323174	-0.0572938	0.061456
SH3BP5	-0.899979	0.0226548	-0.161265	1.5948e-67	-0.135529	1.33621e-06															x
SLCO4C1	-1.06858	-0.0227915	-0.167045	2.05427e-72	-0.0747503	0.011616
GNG11	4.24358	-0.02295	-0.0114999	0.273451	-0.0479938	0.124892																													x
LCP1	-0.497513	0.0229537	-0.400466	0	-0.149611	7.80526e-08																													x
FOXO1	-2.43399	0.0230536	-0.00516578	0.640912	0.0419876	0.187157																																						x
TPST1	2.90968	0.0230618	0.0193095	0.0555423	0.0733807	0.0133979																			x
PRDM8	0.655805	0.023079	0.0692724	2.21881e-13	-0.0129454	0.726592
NCF4	0.224362	-0.0232503	0.145207	7.06358e-55	-0.108537	0.000143255		x
SLC6A13	1.58402	0.023271	0.00920021	0.388582	0.0784429	0.0077565
C12orf57	0.00244622	-0.0232756	-0.161362	1.32747e-67	-0.0544148	0.0780693
C11orf96	1.99895	0.0233314	0.00844979	0.430896	0.0318723	0.335089
AUTS2	2.18655	-0.0233351	0.0992948	3.07493e-26	0.0463735	0.14026																											x
SIX1	2.28615	0.0233544	0.0651227	5.81875e-12	-0.0167893	0.64038
TAL2	1.62662	0.0233739	0.0331645	0.000640754	0.062618	0.0387309
CTSK	-0.341655	0.0233935	-0.00322899	0.773032	-0.00311175	0.934603										x
NID1	0.813987	0.0234134	0.0473052	7.33377e-07	0.0261241	0.442593
IGFBP2	0.33111	0.0234329	0.160158	1.31673e-66	0.0872232	0.00274693														x														x
NR4A1	1.27463	0.0234611	0.0546949	8.67411e-09	0.0406038	0.205009
SLC44A1	0.0811675	-0.0235928	-0.030937	0.00150879	-0.123788	1.16289e-05
LY9	-0.0823857	0.023614	-0.123278	7.9139e-40	-0.0681085	0.0231276
ALDH1A2	-0.00126253	0.0236157	-0.189559	3.24714e-93	-0.0276726	0.412109																													x
ADGRE1	2.91729	0.0236573	0.183107	5.78345e-87	0.0237594	0.490582																									x
PFKFB3	0.219448	0.0236952	0.0967517	5.66394e-25	0.0239859	0.486653	x																					x
CNTLN	0.740917	0.0237484	0.0702699	9.81232e-14	-0.0953609	0.000953003
RASGRP1	-0.734174	0.0238259	-0.0760092	7.18301e-16	-0.0723544	0.0149205											x				x										x
KANK2	0.269489	0.0238412	0.0764432	4.88767e-16	0.0743374	0.0120938
TEAD1	1.72958	0.0239269	0.0547977	8.12981e-09	0.0784242	0.00776197
TEX14	1.14249	0.0239687	-0.0483237	4.12185e-07	0.0348326	0.28725
FAM161A	0.905718	0.0240094	0.0587075	6.01309e-10	0.0761002	0.0100232
CCDC6	0.179715	0.0240413	-0.0621067	5.48971e-11	-0.00496316	0.89863
MFAP5	0.397213	0.0241059	-0.032623	0.000793805	-0.070564	0.0179959														x
IFNL2	2.51782	0.0241995	0.0486858	3.35063e-07	0.00445339	0.907543
CALD1	2.99343	-0.0242796	0.023344	0.0188554	-0.01257	0.733303														x
ARHGEF15	-0.045725	-0.0243221	-0.0131417	0.206668	0.00357339	0.924344
FOXQ1	-4.41021	-0.0243631	-0.0578983	1.0471e-09	-0.027445	0.417009
LACC1	1.22498	0.0243679	0.31627	8.27707e-266	-0.0860704	0.00314862
RPS3A	-0.418878	-0.0244165	-0.397848	0	-0.242872	3.44682e-19		x
SEMA3D	2.13314	0.0245094	0.0583952	7.45546e-10	0.0729713	0.014001
TTC3	-1.10018	-0.0248406	-0.290334	2.56986e-222	-0.13858	7.48577e-07
C11orf97	2.20485	0.0248765	0.0563934	2.85599e-09	0.120156	2.15956e-05
KMO	1.56213	-0.0249145	-0.0272293	0.00558991	-0.224226	1.8199e-16
GLIPR1	-0.685924	0.0249539	-0.212212	5.15726e-117	-0.101715	0.000394														x
FHL1	0.0590622	0.0250381	-0.111975	4.7693e-33	0.00937983	0.806402																																		x
RBP7	-0.17054	0.0250556	-0.0691167	2.51811e-13	-0.00935811	0.806402
CRIM1	0.0371169	0.0251016	-0.000141891	0.990152	-0.0247496	0.47052
DPP4	0.89541	0.0251744	0.146969	3.37272e-56	0.0588355	0.0540514										x	x																											x
CCR7	3.40528	0.025339	0.0775431	1.81254e-16	-0.0110728	0.766619																									x
ABCG2	-0.178913	0.0253825	-0.11229	3.15201e-33	-0.0213635	0.541772																					x
CYB5D1	-0.401885	0.0254348	-0.000426782	0.970419	-0.00452674	0.906609
RPS4X	-0.350017	0.025461	-0.427113	0	-0.221981	3.70475e-16
HES1	1.41018	0.0256547	0.0626645	3.64845e-11	0.0500137	0.109026															x																				x
CAPG	0.038424	0.0257603	-0.396535	0	-0.139003	6.89045e-07		x												x									x
CYTL1	0.388095	0.0258145	-0.0765148	4.5858e-16	-0.0246307	0.472544
ARMCX1	2.28928	0.0260501	0.0753506	1.28441e-15	-0.0601444	0.0484424
FAM213A	-0.0697475	0.0261731	-0.190489	3.90576e-94	-0.108005	0.000155897
RPS15A	-0.391103	-0.0261784	-0.409956	0	-0.237227	2.40953e-18
GPR183	-2.32084	-0.0263286	0.0313905	0.00127225	-0.114669	5.42065e-05																									x
FOXD1	1.95398	0.0263335	0.0382632	7.17263e-05	0.000542871	0.986942
LYZ	-0.31822	0.0265253	-0.383369	0	-0.143647	2.7149e-07
RPS19	-0.25219	-0.0265431	-0.495597	0	-0.283338	5.20878e-26		x
KLF10	-0.221541	-0.0265817	-0.00946829	0.373494	-0.0974196	0.000720312															x
CXCL11	6.58944	0.0265891	0.273815	6.42577e-197	-0.136477	1.11903e-06																								x	x	x	x
TRPM3	0.7897	0.0267377	0.0320376	0.000992949	0.013822	0.708268
CSTA	-0.288594	-0.0268886	-0.367877	0	-0.204459	8.00478e-14
PROX1	2.36401	0.0269923	0.0455713	1.90081e-06	0.0447927	0.155852
NLN	0.0472529	-0.0270321	0.0845648	2.33167e-19	-0.049486	0.112844
ARRDC3	-0.595452	-0.0271259	0.0421127	1.14714e-05	-0.0352362	0.281017
CACNG8	4.63537	-0.0271747	0.0518306	5.19888e-08	-0.0345793	0.291249
GRASP	0.0638845	0.0272454	0.0327426	0.000758064	0.0272952	0.419116
PCDH9	2.41924	0.0272621	0.0194033	0.0543081	0.0886882	0.00228283
SYNPO2	3.72643	0.0274188	0.107629	1.27465e-30	0.0791357	0.00714206
RPL39	-0.311011	0.0274747	-0.437374	0	-0.204798	7.26529e-14		x
PRSS21	-0.533861	-0.0275807	-0.146643	5.92366e-56	-0.0517178	0.0963544
FOS	-1.13921	-0.0276098	0.0978797	1.57217e-25	0.0180864	0.6127															x	x						x															x
PSD3	-0.082595	0.0277498	0.0620157	5.86082e-11	-0.0372902	0.250163
DDB2	-0.145848	0.0277596	-0.091254	2.39526e-22	-0.114332	5.70272e-05												x																									x
HSD3B7	-0.104679	-0.0278126	-0.247387	7.68104e-160	-0.0967538	0.000787538								x																															x
PDLIM7	-0.238603	0.0278542	-0.188851	1.61014e-92	-0.0998566	0.000512496																																		x
LTA4H	-0.831198	-0.0279363	-0.19188	1.61607e-95	-0.128599	4.88782e-06										x	x																				x
CAMP	0.104532	-0.0279997	-0.140936	9.59593e-52	-0.100653	0.000459278
CRABP2	-0.126127	0.0281449	-0.0962524	9.9604e-25	0.0170204	0.635086																																							x
HIVEP2	4.50813	-0.0281891	0.0317433	0.00111264	-0.068139	0.0230686
ID1	1.07533	0.0282269	-0.00425276	0.703501	0.0773615	0.00872204
ENC1	-1.25986	0.0283325	-0.0531715	2.2756e-08	0.0529069	0.0879223
ABCA10	-0.409843	0.0285306	0.00627963	0.56725	0.0882046	0.00242429
SMCR8	0.552911	0.0285949	0.1965	3.39049e-100	-0.009875	0.794441
NBEA	0.370102	0.028756	0.0833079	7.96379e-19	-0.00756077	0.842313
WNT5B	-2.8974	-0.0287693	0.0169758	0.0960724	-0.117296	3.49099e-05
TRAF3IP3	-1.46799	-0.028881	-0.0958015	1.65354e-24	-0.114332	5.70272e-05
TAC3	1.20519	0.0289254	0.0346931	0.000341972	0.0558239	0.069686
BANK1	0.472137	0.0289457	0.0370698	0.000122926	-0.00458547	0.905436																											x
ZBTB43	0.955761	0.0290875	-0.0797103	2.46215e-17	0.00244486	0.950773
ADAM8	0.0606291	-0.029237	-0.0957926	1.66852e-24	-0.0934782	0.00122853																													x
IL1B	3.67496	0.0296236	-0.11294	1.33736e-33	-0.129354	4.26191e-06		x					x																	x	x				x
COLQ	1.6609	0.0297055	0.0779476	1.25186e-16	0.0175131	0.625192
ABI3	-0.230609	-0.0297675	-0.100402	8.41694e-27	-0.0413419	0.19515
C1orf61	2.73252	0.0297803	0.026435	0.00727001	0.0255257	0.456012
EPHB1	1.77144	0.0299199	0.00148906	0.89593	0.0646497	0.0321429
ZFP36L2	-1.46391	-0.0299338	-0.0222969	0.0254721	-0.0974284	0.000720102
C21orf91	2.56513	-0.0299387	0.108216	6.07475e-31	-0.0171414	0.634123
BLVRA	1.21205	0.0299461	0.00942932	0.375729	-0.0465931	0.138112																	x				x
SLAMF9	-0.0553134	0.0299474	-0.207924	2.77675e-112	-0.0875334	0.00264694
JARID2	-0.483521	-0.0299858	0.0491197	2.60186e-07	-0.104473	0.000265001
CDC25B	0.142965	-0.030029	0.158071	6.79739e-65	-0.063999	0.0341618							x						x					x
GSDMA	0.0898916	0.0300511	0.13983	5.97693e-51	0.0623828	0.0394956
PITX1	0.434318	-0.0301092	-0.0109202	0.300052	-0.0248929	0.46851
ARHGEF28	0.465982	-0.0302335	-0.155488	8.1436e-63	-0.0474777	0.129631
SEMA3A	2.4093	0.0302561	0.0419618	1.23627e-05	0.00783055	0.836603
GPER1	0.612104	0.030259	-0.00715097	0.511788	0.0601732	0.0483394																x
TMEM236	-1.19461	0.0302592	0.00946869	0.373494	-0.186891	1.0651e-11
UGCG	-0.181722	0.0302597	-0.0482101	4.39283e-07	-0.120365	2.08527e-05															x
CKB	0.848875	-0.0303383	-0.11646	1.16637e-35	-0.00998563	0.792491																x																		x
PDS5B	-0.0966449	-0.0304082	0.0757921	8.70968e-16	-0.0947327	0.00103657													x					x
ST14	-0.382438	-0.0304473	-0.285428	1.3606e-214	-0.099534	0.000535901																x																					x
CST7	-0.00840044	-0.0304992	-0.0396023	3.86313e-05	0.00803168	0.832228																							x
NEK8	1.22762	0.0305076	0.0819114	3.0739e-18	-0.0649422	0.0313604
FN1	0.443355	0.0305527	0.0444615	3.43297e-06	0.060797	0.045772										x	x			x
AK4	0.250882	-0.0306702	-0.176835	4.06591e-81	-0.137527	9.16826e-07																			x			x									x
ORC6	-0.646351	0.0308059	0.0100878	0.341045	0.017105	0.634394													x					x
ZG16B	0.0470384	0.0309957	0.0236203	0.0173714	-0.0692979	0.0205082
OSM	2.43169	-0.0310234	0.0199593	0.0473209	-0.112931	7.14111e-05																									x
ZCCHC24	-1.26572	0.0310423	0.081282	5.6006e-18	0.072807	0.0142341
SRGAP3	-0.221184	0.0314937	0.040294	2.78932e-05	0.104825	0.000252048
USP53	0.656209	0.0316284	0.0924761	6.46613e-23	-0.00651353	0.865278
EHD1	0.00823433	0.0316739	-0.0372042	0.000115713	-0.0862789	0.00307378											x
PPM1N	-0.126383	-0.0317345	-0.02337	0.0187162	-0.104207	0.000275451
ADD3	-0.81979	-0.0318054	0.0794572	3.11667e-17	-0.0112699	0.762552															x	x															x
ADA	-0.191511	0.0318413	0.0155049	0.131801	0.0515803	0.0972211												x																									x
HS3ST3B1	0.873556	0.0319438	0.0321213	0.000962044	0.0519377	0.0946348
GREB1L	1.56042	0.0320201	0.04	3.20719e-05	-0.0092764	0.807715
CORIN	0.774922	0.0320552	0.0515722	6.09007e-08	0.0835285	0.00428693
HOXA10	0.668086	0.0320957	0.0293419	0.00270094	0.0520271	0.0940131
NOP53	-0.510478	0.0322166	-0.175601	5.43393e-80	-0.102532	0.000351377
DNM1	-0.432957	0.0324148	0.258056	2.75138e-174	0.0714068	0.0165124
KIF20B	0.181407	0.032567	0.0751802	1.48903e-15	0.00792488	0.834761																		x												x
GAL3ST4	2.37838	0.0326606	0.174025	1.44728e-78	0.0859632	0.00319077
CFAP54	1.84237	0.0326901	0.0640018	1.35777e-11	-0.00990492	0.793986
SQLE	-0.9795	-0.0328405	-0.173896	1.88308e-78	-0.145603	1.8109e-07									x									x													x
BBC3	-0.966822	-0.0332332	-0.0679003	6.67241e-13	-0.0952479	0.000967804
ITM2C	0.689539	0.0332434	0.194215	7.25465e-98	0.00941998	0.805964
BCL2L11	-0.936959	0.0332496	-0.179622	1.08158e-83	-0.0460389	0.143422							x																							x
MATK	-0.960746	-0.0332564	-0.350819	0	-0.140582	5.02184e-07
JAG1	-0.783462	-0.0332948	-0.0704796	8.25602e-14	-0.00583166	0.880534				x					x																										x
MAGED2	-0.0598435	-0.033302	-0.0207193	0.0389128	-0.0746167	0.011771
DOPEY1	0.214556	-0.033328	0.0617788	6.94639e-11	-0.129498	4.15146e-06
CD63	-0.114924	-0.0335731	-0.436766	0	-0.160141	7.851e-09																																									x
BCL2L14	5.33218	-0.0337101	-0.0380173	8.00768e-05	-0.0408287	0.202073
GADD45G	-1.58273	0.0338028	0.024221	0.0145428	-0.0440106	0.164468																													x
HLA-DQA2	0.379815	0.0339009	0.303403	1.12377e-243	0.0634198	0.0359205
OLR1	0.845818	-0.0339519	-0.230786	1.02888e-138	-0.237845	1.97241e-18				x						x	x														x
CFAP43	0.986003	0.0344432	0.013933	0.178702	0.149839	7.44336e-08
TLR5	-1.61285	0.0346244	0.0589052	5.25609e-10	-0.0516733	0.0966077
MIDN	-1.05337	-0.0346734	-0.0637688	1.61052e-11	0.0636441	0.0352295
DICER1	-0.690271	0.0346817	0.0128379	0.218118	-0.0706377	0.017906
PHLDA1	-0.0677166	0.0346871	-0.111084	1.53021e-32	0.047998	0.124892																							x
BEX3	0.00594583	0.0348231	0.0571336	1.7467e-09	0.0745876	0.0117922
NDN	-0.234302	0.0348743	0.0106222	0.314016	0.0329759	0.315651
CCDC170	-1.03925	-0.0348859	0.0753449	1.28977e-15	-0.0484234	0.121162
TMEM173	0.783267	-0.0348917	0.0181779	0.0728551	-0.0819999	0.00514638
SLC12A8	2.26989	-0.0350586	-0.113517	6.21825e-34	-0.138959	6.94297e-07
FSTL3	-0.924434	0.0351034	0.0706582	7.13203e-14	-0.00756008	0.842313														x
ZNF891	-1.25678	0.0351372	0.0146389	0.156115	-0.0351553	0.28226
ITM2B	0.451128	0.0353435	0.0619264	6.2434e-11	0.0163188	0.650453
IDO2	4.35636	0.035386	0.0898833	1.02266e-21	-0.00657824	0.863974
GM2A	-0.3954	0.0356867	-0.289816	1.68747e-221	-0.13737	9.43887e-07																																					x
CBLB	-1.32137	-0.0357137	0.119791	1.15391e-37	-0.0343594	0.29418											x
RRP12	-0.943863	0.0359205	-0.0322052	0.000931411	-0.0499343	0.109584			x												x																		x
ETV3	-0.337612	0.0361579	0.00867498	0.417566	-0.0283536	0.398895
TWIST2	1.64404	0.0362397	0.0126334	0.226178	-0.0229481	0.508187
SLC25A48	-1.75062	-0.03633	0.0220843	0.0269672	-0.0383374	0.235492
CREB5	-0.249791	0.0364251	0.0711959	4.56413e-14	0.00132618	0.972173
SSBP3	-1.42034	0.0365889	-0.145769	2.68569e-55	0.0257211	0.45186
SLC12A5	0.338544	0.0366706	0.167858	4.08167e-73	0.0888213	0.002246
2021-09-11	-0.728495	-0.0367741	-0.357015	0	-0.0882209	0.00242342
LRG1	2.99431	0.0369719	0.0472583	7.52653e-07	-0.0450501	0.153675
TRIL	4.95338	-0.036992	-0.0913447	2.17481e-22	-0.0750788	0.0112302
TMEM91	-0.535892	-0.0370083	-0.311507	1.73063e-257	-0.128061	5.38197e-06
NEU4	2.43408	0.0371322	0.0837052	5.42187e-19	-0.0538015	0.0818861
FAAH	0.375845	0.0372559	0.0202666	0.0437594	0.0732913	0.0135262
RPGR	-0.974354	0.0372731	0.000258717	0.981758	0.0113725	0.759951
RASD1	1.53115	0.0374166	0.0276858	0.00479133	0.121244	1.80133e-05
PLPP3	-1.81163	-0.0374536	-0.142851	3.89591e-53	-0.204603	7.68553e-14
ADORA3	-2.35666	-0.0375991	0.0380795	7.78903e-05	-0.0648681	0.0315577
PLAU	-2.89783	-0.0376195	-0.0239364	0.015795	-0.146442	1.52172e-07										x																			x
RDX	0.556357	-0.0379468	-0.150459	7.33884e-59	-0.187844	8.31391e-12
ATP6AP1L	-0.332472	0.0380102	-0.0478017	5.54274e-07	0.0231908	0.502543
XRCC2	-0.0633419	0.0381253	0.0408924	2.089e-05	-0.00056684	0.986942
BTK	0.630973	0.0382267	0.0135105	0.193247	-0.0496343	0.111913
GALNT12	-0.242609	-0.0384786	-0.27725	4.66754e-202	-0.0858991	0.0032151
S100B	-0.793234	-0.0385208	0.0323443	0.000881952	0.0297646	0.372801
PPP1R14B	-0.884175	-0.0385303	-0.239811	5.29158e-150	-0.177399	1.2788e-10
CSTB	-0.15311	-0.038726	-0.429549	0	-0.192199	2.55495e-12
ALCAM	-0.213053	0.0387914	-0.309095	2.48329e-253	-0.0844825	0.00380775									x														x
IL18RAP	2.79999	0.0389786	0.101389	2.61796e-27	-0.00717581	0.851827		x																							x
MYO6	1.42722	0.039022	0.00543992	0.621769	0.123016	1.3321e-05
EVA1B	-0.397056	-0.0391004	0.044701	3.02649e-06	-0.106139	0.000206945
CXCR4	-2.17908	0.0391704	-0.0639863	1.37271e-11	-0.0863219	0.0030618																			x			x							x		x									x
CAMSAP2	0.604913	-0.039288	0.0225024	0.0240752	-0.0608582	0.0455273
ITPRIPL1	-2.40655	-0.0393338	-0.0494385	2.16604e-07	-0.0514764	0.097974
RGS1	2.99472	-0.0395907	0.0611502	1.09334e-10	-0.107018	0.000181502																									x
SYNE3	0.0440439	-0.0397393	0.0701642	1.07031e-13	-0.125305	8.88438e-06
RETREG1	0.254179	0.0398581	-0.00486576	0.661145	0.0654833	0.0298721															x
IER5L	-3.09081	0.040479	-0.178803	6.22431e-83	0.0812709	0.00559053
EGR3	1.10466	0.0405145	0.0533686	2.01054e-08	0.0598159	0.0498546							x								x	x
SOCS2	0.283719	-0.0406943	0.131983	1.70131e-45	-0.0805364	0.00607344																							x
UNCX	1.70179	0.040895	0.0423073	1.04131e-05	0.0602615	0.0479882
CAVIN1	0.227129	0.0409269	-0.141518	3.64533e-52	-0.0181014	0.6127	x																					x
TUBB6	-0.172155	-0.0410708	-0.340444	1.87820794866007e-310	-0.138881	7.04435e-07
TMEM47	3.00427	0.0411135	0.033154	0.000643142	0.052375	0.0913479
NUDT4	-1.36424	0.0411284	-0.0271082	0.00582238	0.0462155	0.141812																					x
ARC	2.15113	0.0411563	0.034899	0.000314427	0.0577544	0.0591056
RRS1	-3.47448	0.041267	-0.0595378	3.39755e-10	-0.0157132	0.664079
KLHL23	0.208784	0.0412944	0.0240554	0.0152599	0.100325	0.000481187
KIF2A	-0.580893	0.0415291	-0.124282	1.85495e-40	-0.0879061	0.00252188											x								x
TREM2	-0.525637	-0.041608	-0.475341	0	-0.125006	9.37073e-06
FBN2	1.59103	0.0417968	0.125398	3.58807e-41	0.106933	0.000183596														x
TAGLN2	-0.355865	0.0419553	-0.311899	3.63131e-258	-0.125676	8.31009e-06
MRC1	-0.686545	-0.0419631	-0.358341	0	-0.169906	8.099e-10
NASP	0.748349	0.0420013	0.140061	4.10462e-51	0.0490305	0.116626													x					x	x
LY75	-0.525873	-0.0422253	-0.184302	4.18969e-88	-0.068179	0.022986		x
GPR84	4.09433	-0.0422468	-0.0211256	0.0349139	-0.182193	3.71363e-11
HLA-DPB1	-0.217201	-0.04234	-0.00739278	0.496125	-0.0928539	0.00133275
HILPDA	-1.18035	0.0423447	0.0187753	0.0631409	-0.101274	0.000419869
FCGR3A	0.998237	0.0423973	0.122443	2.63814e-39	-0.0237548	0.490582
ITPR2	0.0732143	-0.042723	0.0792727	3.69403e-17	-0.159195	9.73468e-09																																								x
SLC1A5	-1.82208	-0.042823	-0.241194	9.03042e-152	-0.00313835	0.934115	x																						x								x
CDK2AP1	-0.133693	-0.0430741	-0.0497932	1.76057e-07	-0.129112	4.45288e-06
GCC2	0.0418728	0.0431093	-0.00065196	0.955327	-0.120077	2.18498e-05
ADA2	-0.00771077	0.0431869	0.187128	7.80081e-91	-0.0220139	0.52843
TRIM58	0.525025	0.043255	0.0635754	1.86041e-11	0.0460458	0.143422																					x
C3	0.636527	0.043312	-0.201918	7.76018e-106	-0.0746551	0.0117275	x									x	x										x
PRUNE2	2.48388	-0.0434973	0.120089	7.58395e-38	-0.0597279	0.050181
USF2	-0.539326	-0.0437484	-0.238338	3.9644e-148	-0.18618	1.28715e-11
SYNGR1	-0.280348	-0.0437939	-0.241827	1.38186e-152	-0.138298	7.87334e-07															x
ATF4	0.0891312	-0.0439042	-0.292688	4.40277e-226	-0.0467644	0.136445
GPX3	-0.347749	-0.0439593	-0.236253	1.69482e-145	-0.12887	4.64603e-06	x						x																											x								x
UBE2Z	1.52843	-0.0440437	0.104206	8.82739e-29	-0.358717	3.62107e-42
MXD1	1.26362	0.0443941	0.0785414	7.26293e-17	0.0143655	0.69651																							x		x												x
GRIN3A	4.85768	-0.0446738	0.130762	1.12045e-44	-0.058376	0.0561506
TMTC1	0.0239315	-0.0447214	0.0225352	0.0238548	-0.0779918	0.008134
TTC9	-0.122745	-0.0448944	0.054143	1.23357e-08	-0.0279227	0.407637
HIP1	-1.15242	0.0449628	0.0240481	0.0152867	-0.00875581	0.818024
ROGDI	-0.887287	-0.044986	-0.25257	9.10857e-167	-0.143799	2.63605e-07
CCND1	0.898848	0.0451203	-0.0313619	0.00128584	-0.0576239	0.0597631			x				x								x	x		x																	x
CDCA4	-0.3884	0.0451243	-0.0126106	0.227088	-0.00121618	0.973494
SPEN	-0.305533	-0.0452535	-0.0416705	1.42721e-05	-0.124981	9.40232e-06
EPB41L2	0.136244	0.0453645	-0.106273	6.95672e-30	-0.00953623	0.803233					x																									x
HLA-DRA	-0.0933708	-0.0454017	-0.222069	2.76922e-128	-0.158905	1.03855e-08		x
CYP2U1	2.4848	0.0454341	0.114023	3.17037e-34	0.0902134	0.00187982
DMXL2	-0.788875	-0.0455485	-0.0494973	2.09335e-07	-0.190696	3.85864e-12
ATP13A3	-0.324539	0.0455903	-0.24394	2.55137e-155	-0.139306	6.51055e-07
PPARG	-2.01965	0.0456231	-0.148577	2.04716e-57	-0.136491	1.11751e-06	x								x
KLF5	0.82065	0.0457366	0.000119431	0.99136	0.0320057	0.332757																																		x
LHFPL6	1.09944	0.0457574	-0.0120686	0.24918	0.0524305	0.0909591
LBH	2.17714	0.0458305	-0.00268088	0.812378	0.103779	0.000293983
TPM1	-1.24991	0.0458649	-0.0233312	0.0189189	-0.0267584	0.429622														x
EMP3	0.35553	0.0464631	0.118007	1.38573e-36	-0.128363	5.10057e-06														x											x
RPL32	-0.352114	-0.0465054	-0.434577	0	-0.272499	4.79971e-24
SGTB	1.03858	0.0466002	0.119062	3.20348e-37	-0.0807758	0.00590406
MSR1	1.66141	-0.0468284	-0.171532	2.43902e-76	-0.0340448	0.298993																									x
C1orf122	-0.509222	0.0468333	-0.320673	1.21247e-273	-0.135565	1.32846e-06
AHR	-1.33328	-0.0469092	0.0671123	1.24153e-12	-0.102201	0.000368667																							x		x
LAIR1	-0.758599	-0.0469337	0.0587103	6.00822e-10	-0.0485512	0.120383
SSTR2	2.27123	-0.0472601	0.126995	3.37283e-42	-0.023374	0.498521
RTF1	0.21428	0.047872	-0.069833	1.40534e-13	-0.0170965	0.634394
PDE4B	3.87058	-0.0479181	0.0212693	0.0337145	-0.16621	1.92297e-09												x													x		x
HRH1	-1.99117	-0.0480588	0.139345	1.31958e-50	-0.156414	1.77117e-08																									x
LDHAL6B	2.41981	0.0481264	0.0431761	6.71662e-06	0.0188217	0.597078
NR6A1	-1.35068	0.048341	0.042109	1.14851e-05	0.0614148	0.0432862																												x
RRAGC	0.827853	-0.0485095	0.0470841	8.29578e-07	-0.107733	0.000162387
DUSP8	1.84141	0.0486305	-0.00955825	0.368706	0.0908383	0.00173407
KIF21A	0.610462	0.0487104	0.0160294	0.118204	0.0937367	0.00119023
SNAI3	-3.61848	-0.0487485	-0.14689	3.86553e-56	-0.0810338	0.00573534
HIP1R	2.19282	0.0488116	0.058075	9.27723e-10	0.024476	0.476367
ALOX5	-0.348032	-0.0489777	-0.0433447	6.15434e-06	-0.0290569	0.385776
CENPE	0.137489	0.0490311	0.0605614	1.66479e-10	0.0534593	0.0840642													x					x												x
ME1	0.127387	0.0490787	0.218368	5.51637e-124	-0.00898559	0.81346	x										x						x		x												x
CENPF	-0.407943	0.0490988	0.0132422	0.202891	0.0895925	0.0020343																		x												x
LTB	-1.14514	-0.0493398	0.0438862	4.63975e-06	-0.0483905	0.121296		x																					x	x
TTC26	2.79101	0.0493762	0.0402352	2.86522e-05	-0.00846692	0.822631
TGM2	0.0706288	0.0495167	-0.356976	0	-0.12176	1.66139e-05														x	x							x	x
TRAF1	2.22472	0.0495374	-0.00632439	0.564644	-0.110069	0.000113125					x																		x						x
F3	2.69259	-0.0498167	-0.0856612	7.83814e-20	-0.0790519	0.00721015										x	x											x			x
NFYB	0.0697166	-0.049942	0.036676	0.000146481	-0.0174141	0.6276
MAP7	-1.12243	0.0499721	0.072862	1.11449e-14	0.0206623	0.556623			x																										x														x
POU2F2	-0.509401	0.0500058	0.0767727	3.63831e-16	-0.0822746	0.00498686
ETS2	0.236367	0.050217	0.0753201	1.31736e-15	0.0568826	0.0636308																				x
MMP12	0.288169	-0.0502288	-0.0825563	1.65421e-18	-0.0359318	0.27045											x
ADAMTS14	1.19272	0.0505089	0.223595	4.45469e-130	-0.0241025	0.484448
ERBIN	0.299543	-0.0505527	0.10133	2.80443e-27	-0.139498	6.26643e-07
PLA2G7	-0.39595	0.0506526	-0.242898	5.73424e-154	-0.0341894	0.296905											x
SLC11A2	-0.305049	-0.0511469	0.0589697	5.03271e-10	-0.268752	2.21717e-23																					x				x
CAVIN3	-0.00660455	-0.051357	-0.109017	2.20592e-31	-0.136263	1.16712e-06																						x
RPL26	-0.44248	-0.0513739	-0.393681	0	-0.248386	5.01487e-20
DDIT3	-0.032903	0.0518276	-0.0222113	0.0260251	0.0109659	0.769061							x															x									x						x			x
HSD11B1	0.461451	-0.0518893	-0.368111	0	-0.16212	5.05296e-09																													x
DCSTAMP	-0.288394	-0.0519221	-0.282747	1.91876e-210	-0.188543	6.88808e-12
MMP14	0.310072	0.0519534	0.0592984	4.01383e-10	-0.0157588	0.663084										x	x			x											x
GKAP1	1.06515	0.0519715	0.0607734	1.43022e-10	0.0626996	0.0384663
ALAS1	0.21416	0.0519739	-0.24006	2.55668e-150	-0.135254	1.40414e-06																																				x
MS4A7	-0.0296752	-0.0522949	0.0506685	1.05058e-07	-0.248866	4.2118e-20
JMY	-1.61842	0.0529249	0.0469914	8.73572e-07	0.0587917	0.0542321
CRYBG3	0.171973	-0.0531792	-0.0374939	0.000101496	-0.0605127	0.0468801
KDM6B	0.41304	0.0533114	0.011072	0.293318	-0.160396	7.44534e-09
FDPS	-0.272238	-0.0533153	-0.27207	2.44889e-194	-0.219029	9.27492e-16									x																									x					x
DHRS11	-0.586935	0.0533215	-0.249487	1.24988e-162	-0.0638656	0.0345598
IFNA1	2.89929	0.0534692	0.0519	4.98368e-08	0.0386491	0.231188
NR1D2	-0.636893	-0.0534921	0.0205446	0.0407134	-0.112403	7.77183e-05
ERO1B	1.43718	0.0539182	0.137976	1.23482e-49	0.0547765	0.0757849
NMB	0.0833467	0.0543001	-0.108879	2.62853e-31	-0.00133397	0.972173
CTSB	0.00591764	-0.0543126	0.0134695	0.194697	-0.0294716	0.378224										x	x										x
LILRA6	0.349283	-0.0543347	0.150535	6.42532e-59	-0.0794363	0.00690517
SERPINB9	2.18763	-0.0545416	0.108637	3.57972e-31	-0.0495374	0.112491
EGFL7	0.0281533	0.0545683	-0.00567602	0.60676	0.0604606	0.047089
HSPB1	-0.193411	-0.054887	-0.0424433	9.737e-06	-0.0969394	0.000768614						x	x
PRDX2	-0.267732	-0.0549462	-0.200214	4.82604e-104	-0.0960716	0.00086695																					x																					x
MAP3K14	-1.4793	-0.0549544	-0.0513239	7.07123e-08	-0.0928747	0.00133011
LRRC4	0.81919	0.0551279	0.123741	4.05105e-40	0.00154324	0.967928
APLP2	-0.2334	0.0553762	-0.395495	0	-0.154608	2.64602e-08	x
CIR1	0.857847	0.0554413	-0.0304168	0.00183443	-0.0826246	0.00477726																					x
PON2	-0.217358	-0.0556237	-0.148832	1.30849e-57	-0.0955267	0.000932147
TTC9C	-0.975237	-0.0556687	-0.128256	5.08044e-43	-0.161334	6.01926e-09
MMP19	0.805875	0.0558268	-0.00453156	0.683867	-0.0261201	0.442593
AKAP12	-0.0091955	0.0558491	-0.0671976	1.16113e-12	0.0512744	0.0995875			x																			x							x
CD74	-0.110159	-0.0562792	-0.0603563	1.9228e-10	-0.111772	8.58348e-05		x																								x	x
IL21R	-1.28837	-0.0563597	-0.205302	1.91775e-109	-0.166364	1.85864e-09
HLA-DOA	0.437538	0.0563851	0.159467	4.88569e-66	0.000756541	0.98301		x
P2RX4	1.1524	0.0563889	-0.0195114	0.0528051	-0.164831	2.67276e-09																							x		x
PLK3	0.011523	0.0564948	-0.0411122	1.87879e-05	-0.141837	3.91805e-07																																					x
PDLIM2	-2.23252	-0.0570382	-0.139413	1.18258e-50	-0.0328251	0.318423
ZNF804A	-0.96234	-0.0575003	-0.147523	1.28592e-56	-0.0573904	0.0609375
RRM2B	0.439	0.0575998	-0.0387797	5.66284e-05	-0.081486	0.00546898												x
NLRP3	-0.0624946	-0.0576183	0.0301776	0.00200055	-0.100597	0.000462738		x																							x
ZMAT1	0.0171906	0.0579098	0.0808945	8.08908e-18	-0.0100276	0.791829
LFNG	-2.36042	0.0579436	-0.0168554	0.098633	-0.0104445	0.78205																												x							x
PHLDA2	1.66617	0.0581768	-0.171208	4.717e-76	-0.112059	8.21703e-05
RPL7A	-0.473213	-0.0582898	-0.436151	0	-0.22379	2.08056e-16
CSRP2	4.79639	0.0583575	0.197479	3.35476e-101	0.0579007	0.0584849																						x
TNFRSF18	1.12759	0.0584067	-0.0225958	0.023454	-0.0252432	0.460551																							x
COLEC12	-0.944941	0.0584272	0.142699	5.01681e-53	0.00839009	0.824102
ID3	-1.58703	-0.0588412	0.086082	5.12511e-20	-0.060685	0.0462175
TAF4B	-0.606297	0.0593047	0.102803	4.83352e-28	0.0698626	0.019386
RPS6KA1	-1.69347	-0.0593896	-0.267757	4.86623e-188	-0.0863283	0.0030618																																								x
GPT	-0.5634	-0.059836	-0.16148	1.06188e-67	-0.121612	1.70022e-05
RGS12	-0.655174	0.0603974	-0.169855	7.37925e-75	-0.166644	1.74125e-09
NISCH	-0.887972	0.0604445	0.0599397	2.56876e-10	0.0406552	0.204346
BTG2	-0.763515	-0.0604717	0.0673687	1.01588e-12	-0.0827392	0.0047159							x														x				x			x			x						x
SIGLEC10	-0.481734	-0.060554	-0.29871	7.07371e-236	-0.143512	2.78978e-07
SYNM	2.52654	0.0605553	0.0405098	2.51395e-05	0.14617	1.60648e-07
HCST	-0.245631	-0.06067	-0.432577	0	-0.153304	3.53504e-08
CPVL	-0.237943	-0.0608388	-0.0812949	5.5416e-18	-0.0184512	0.605342
TLR7	3.45126	-0.060937	0.14258	6.12594e-53	-0.0652372	0.0305577																							x
TSC22D3	-0.314846	0.0609933	-0.0169699	0.0961629	0.0845225	0.00379132
BCL2	1.11786	-0.0610025	-0.0639006	1.46118e-11	-0.0808934	0.0058275															x	x						x	x
SMAD6	0.260604	0.06117	-0.0485471	3.62523e-07	0.0807481	0.00591952
DNASE1L3	-0.861185	-0.061259	0.265355	1.39961e-184	0.0807832	0.00590361
HLA-DQA1	0.115802	-0.0613782	-0.0819515	2.95987e-18	-0.120762	1.95334e-05		x																									x
HSD17B14	-0.0775276	0.0614498	-0.0837484	5.20062e-19	0.028799	0.390298			x
RANBP3L	3.41406	0.0614556	0.103243	2.85264e-28	-0.03963	0.217643
SAV1	1.85077	-0.0615366	-0.0663405	2.26865e-12	-0.156381	1.77815e-08
ANKLE2	-0.00193516	0.0615726	-0.0143981	0.163559	-0.127791	5.62768e-06
INTS6	-0.317493	0.0615885	0.0602358	2.08775e-10	-0.00640918	0.867586
SLCO2B1	-1.25486	0.0616696	0.200175	5.29803e-104	0.0858483	0.00323388
EEF1A1	-0.578261	-0.0617585	-0.323869	2.06489e-279	-0.207708	3.03805e-14
MLXIP	-1.56065	0.0619273	0.0264174	0.00730942	-0.048533	0.120494
SH3PXD2A	-0.73411	-0.0619454	-0.0672506	1.11514e-12	-0.0894561	0.00206888
HIVEP1	1.88056	-0.062353	0.0347931	0.000328436	-0.0901274	0.00189871
LY86	0.180984	-0.0625495	-0.186788	1.66951e-90	-0.13478	1.53797e-06		x
NR1H3	-0.189695	-0.0625678	-0.088901	2.86059e-21	-0.0907923	0.00174308
H1F0	-0.565647	0.0625815	-0.015423	0.133825	-0.0383054	0.23578
HERPUD1	-0.691634	-0.0626997	-0.0187436	0.0635675	0.0290471	0.385817
SPHK1	1.17319	-0.062752	-0.249569	9.75758e-163	-0.119923	2.24078e-05																									x									x			x
OSGIN1	0.197087	0.0630676	0.0479293	5.15436e-07	0.0136942	0.711386																																					x
TJP2	0.645211	-0.0632889	0.0933791	2.4259e-23	-0.0726805	0.0144253
DHRS4	-0.503651	-0.0633355	-0.276724	2.87665e-201	-0.167514	1.43868e-09
NRGN	-0.763191	-0.0634582	-0.242607	1.36517e-153	-0.099377	0.00054705
TIMP3	0.515513	0.0635643	-0.0883588	5.00977e-21	0.0507782	0.103248							x			x				x
ARID3A	-1.65055	-0.0635963	0.0797539	2.36537e-17	-0.15368	3.25053e-08
ITGA10	0.747443	0.0636189	-0.00555375	0.615168	0.197821	5.37672e-13					x
LRRK1	-0.0667792	0.0636735	-0.0351586	0.000282164	-0.0190511	0.591683
PPA1	1.47857	-0.0638044	-0.205401	1.5034e-109	-0.15041	6.57575e-08																															x
CTNNAL1	-1.1958	-0.0642555	-0.23109	4.39357e-139	-0.0562061	0.0674316
SRC	1.24962	-0.0642705	0.0463767	1.2267e-06	-0.0889386	0.00221447					x						x
LRP1	-0.585515	-0.0642971	-0.35248	0	-0.131364	2.95214e-06										x	x			x
LRPAP1	-0.216099	0.0644283	-0.412556	0	-0.101722	0.000394				x
SCRN1	-0.401044	-0.0644731	-0.0423436	1.0228e-05	-0.0688878	0.0213554																																									x
STARD5	2.15821	-0.0644945	0.0571899	1.6836e-09	-0.0304297	0.359805
CCL17	0.261757	-0.0648107	-0.170805	1.07345e-75	-0.0922993	0.00143042																									x
HMGN3	-0.400057	-0.0648342	-0.225029	8.95361e-132	-0.103381	0.000311533
SCN9A	-0.887523	-0.0648939	0.09122	2.47945e-22	-0.0750244	0.0112841																							x
FNDC3B	0.139583	-0.0650471	-0.0689541	2.86805e-13	-0.107961	0.000156831
MARCO	0.102394	-0.0650667	-0.183686	1.62553e-87	-0.170286	7.40549e-10																									x
NQO1	-0.0973164	0.0651674	0.0211604	0.034626	0.018912	0.595156																																		x								x
MSRB1	-0.394239	-0.0653159	-0.210464	4.50468e-115	-0.093474	0.00122853											x
C4orf36	0.0982685	-0.0653206	-0.0239927	0.015545	-0.0348483	0.287097
GFRA2	-1.80081	-0.0653912	0.191835	1.78933e-95	0.0383529	0.235467
QPRT	-0.757712	-0.0655197	0.229911	1.1954e-137	0.12072	1.96319e-05
GPCPD1	-1.66944	-0.065595	-0.235391	2.04106e-144	-0.133004	2.17048e-06
PRSS23	2.15354	0.0656484	0.104297	7.91382e-29	0.0797003	0.00670007										x					x	x
PCM1	-1.67134	-0.0659423	-0.198719	1.73616e-102	-0.133749	1.87679e-06																														x
DUSP6	0.0224266	-0.0661281	0.0513563	6.93991e-08	-0.0776865	0.00842036										x	x																		x
NHLH1	0.130081	0.066205	-0.0134643	0.194819	0.172027	4.85025e-10
RNASE6	-0.158631	0.0662827	0.0575697	1.30905e-09	0.0115892	0.754702
RARRES1	0.780078	0.0664224	-0.00854786	0.425172	-0.00618904	0.87287
VCL	-1.61524	-0.0664785	-0.226375	2.20672e-133	-0.131463	2.90738e-06					x																									x
NRP2	0.244243	-0.0665784	0.0846438	2.16126e-19	-0.132838	2.23954e-06																				x
SLC7A8	-1.40468	-0.0668222	0.0189984	0.0599887	0.0134096	0.717412
FFAR2	5.80349	-0.0668532	0.0429868	7.40238e-06	-0.172277	4.55877e-10																									x
CDC42EP3	0.199323	-0.0669431	-0.205264	2.10294e-109	-0.0439713	0.164784
ARHGAP5	1.05314	0.0671692	0.0347801	0.000329879	0.0668122	0.0263154																														x
ZFP36	0.238015	-0.067222	0.124095	2.42666e-40	-0.0372495	0.250742																x						x
NFKBIZ	3.22324	0.0672539	0.0505485	1.12809e-07	0.0763288	0.00978546																							x
DST	0.325524	0.0672946	0.116328	1.39783e-35	-0.0571871	0.0619543														x																x											x
DUOX1	-0.742128	-0.0673336	-0.030673	0.00166624	-0.0741227	0.012371
STK39	0.0592056	0.067347	-0.0222613	0.0256869	-0.00320359	0.932768			x
CDC14A	0.0420077	0.0675965	0.0326051	0.000799103	0.102188	0.000369039
LAMA3	3.49314	0.0676776	0.118164	1.11785e-36	-0.000391815	0.990275					x									x
CLEC19A	-0.591534	-0.0680934	-0.154899	2.40391e-62	-0.0999218	0.000508517
ACAT2	-0.144385	-0.068396	-0.325827	5.56599e-283	-0.158841	1.05035e-08									x								x
S100A9	0.0528424	0.0684678	-0.157097	4.16807e-64	-0.0812782	0.00559053											x					x
RRAD	1.19573	0.0685852	0.0276721	0.00481181	0.0841073	0.00398781																																					x
FADS2	-0.565452	-0.0686613	-0.165412	5.16013e-71	-0.10304	0.000326759								x	x																						x
STAMBPL1	-0.398479	-0.0687044	0.00284436	0.800534	-0.121503	1.72975e-05
BID	-0.0842179	-0.0687904	-0.303859	1.94606e-244	-0.202567	1.37399e-13							x
PDCD4	-1.4842	-0.0687908	-0.0132	0.20453	-0.0501215	0.108292	x						x									x
CLSPN	1.88806	0.0689013	-0.00746591	0.491864	0.0225524	0.51758
DNASE2	0.0286569	0.0690382	0.0139838	0.177056	0.0147534	0.687441
SPINK1	1.93497	0.0690519	-0.118049	1.30732e-36	-0.0793702	0.00695474
BBX	1.58733	-0.0690894	0.0608882	1.31749e-10	-0.118571	2.82443e-05
RPS6KA5	0.889033	-0.0691938	0.038711	5.84228e-05	-0.0463328	0.140639																		x
TGFBI	-0.457045	-0.0694609	-0.00963141	0.364679	-0.0547828	0.0757849					x									x					x			x
DCP1A	1.89873	-0.0695018	0.104971	3.48096e-29	-0.0271628	0.421167
EEF1B2	-0.434964	-0.0695436	-0.428911	0	-0.249663	3.24917e-20																																x
RPS4Y1	-0.455013	-0.06967	-0.306731	2.70833e-249	-0.189721	4.96637e-12
IL7R	1.74383	0.0697049	-0.0529907	2.54807e-08	-0.1693	9.35583e-10																									x				x
SORT1	-0.773941	-0.0697845	-0.313408	8.57663e-261	-0.140267	5.35588e-07
PCNX1	0.977788	-0.0698337	0.0973629	2.82769e-25	-0.0589117	0.0536915
RPS18	-0.416752	-0.0702546	-0.45593	0	-0.222676	2.97384e-16
CPM	-1.20474	-0.0703989	-0.37491	0	-0.16679	1.68644e-09											x
PLEKHA5	-1.45936	0.0704223	-0.0402694	2.82138e-05	0.059655	0.0504774
NDRG2	-0.780641	-0.0705401	-0.139026	2.22172e-50	-0.0658974	0.0287234
PIM1	-1.3913	-0.0708732	-0.111416	9.91801e-33	-0.191864	2.80448e-12											x											x	x	x			x
ABHD2	-1.22521	-0.0708883	-0.317829	1.44043e-268	-0.16571	2.16627e-09			x												x	x
IRAK3	0.0166489	-0.0709949	-0.0218878	0.0284776	-0.175906	1.85958e-10
C5AR1	-0.765394	-0.0712784	-0.198766	1.55526e-102	-0.12824	5.21494e-06																									x
TMEM176A	-0.0562504	0.0713403	0.0403098	2.76962e-05	0.0112029	0.763459																													x
NCR3LG1	-0.365906	0.0717107	0.0395285	4.00028e-05	-0.0611238	0.0445292
DCAF4L1	0.457446	0.0720346	0.0230571	0.0204831	0.228782	4.15196e-17
FYN	0.110748	0.0720591	-0.0463376	1.25281e-06	0.0558087	0.0697375										x	x
SPP1	0.284155	-0.072124	-0.414037	0	-0.169714	8.46576e-10				x										x									x						x
CRIP1	-0.631158	-0.0722206	-0.0645391	9.07854e-12	-0.0927443	0.0013497
RFTN1	0.524653	-0.0722208	-0.0527088	3.03735e-08	-0.150499	6.46786e-08
HMG20B	-0.642005	-0.0722645	-0.299011	2.26912e-236	-0.120731	1.96173e-05
ZNF703	-1.94247	0.0722675	-0.00549003	0.61913	0.161615	5.66038e-09
C10orf128	-1.47993	-0.0723062	-0.209575	4.29592e-114	-0.193364	1.85852e-12
CYSLTR1	0.353762	-0.0723208	0.0392558	4.5418e-05	-0.112541	7.60126e-05
KCNMB3	1.0634	0.0723991	0.0902034	7.31132e-22	-0.00362423	0.923553
NET1	-0.286101	0.072565	0.0276043	0.00492206	0.0085642	0.820512																														x
FSD1L	0.344495	0.0727179	0.0284229	0.00373147	-0.0434894	0.169996
SLC41A2	0.871256	-0.0727182	-0.0882536	5.58377e-21	-0.0987693	0.000597547
ATP8B4	0.46778	-0.0728451	0.161737	6.50259e-68	-0.0316285	0.339459
TMEM38B	0.169434	0.0729115	-0.17972	8.77727e-84	-0.039335	0.221742
P2RX7	1.55994	-0.0729294	0.0108122	0.30539	-0.194619	1.31411e-12																									x
ID2	-1.2923	0.0729512	-0.105514	1.78554e-29	-0.0429806	0.175454														x		x													x
MSX1	4.10926	0.0732566	0.0672288	1.13367e-12	0.0175906	0.62368				x										x
DSP	4.28182	-0.0732985	-0.147963	5.99424e-57	-0.113853	6.15408e-05
GGT5	0.233	-0.0736022	0.192015	1.18759e-95	-0.0514304	0.0983054
ACSM3	0.879991	-0.0737318	-0.0842308	3.24111e-19	-0.0396868	0.216866																	x
NEB	-0.124094	0.0738083	0.00281938	0.802122	0.212682	6.7287e-15
UACA	-0.108301	0.0740263	-0.0142453	0.168115	-0.0235246	0.495385
CMYA5	1.49675	0.0742261	0.0377491	9.04274e-05	0.110617	0.000103645
CES1	0.480737	-0.0744659	-0.199031	8.26058e-103	-0.103226	0.000318102
SDS	2.64036	-0.0748132	-0.106374	6.15019e-30	-0.116321	4.10569e-05
KIAA1549	1.17871	0.0750146	0.00275979	0.806699	0.130832	3.25049e-06
A2M	-0.241281	0.0751002	-0.210652	2.79381e-115	-0.0536172	0.0830412										x														x
ZNF280B	0.411754	0.0756225	0.0421765	1.11112e-05	0.112586	7.55318e-05
PTGS2	4.09258	0.0756828	0.0996359	2.06386e-26	0.0073899	0.846073																											x		x
TYSND1	-0.626135	0.0759964	0.0190148	0.0597638	-0.0216631	0.535797
EIF4B	-0.909154	-0.0759977	-0.155353	1.04194e-62	-0.148063	1.08124e-07
CCDC168	0.735439	0.0761605	-0.0118805	0.257104	0.0867346	0.00291649
IRAK2	2.9312	0.0763189	0.124042	2.61814e-40	0.00360971	0.923553																									x
AQP9	0.32475	-0.07632	-0.39132	0	-0.183533	2.6123e-11								x																	x
CEP290	0.0530113	0.0766545	-0.043729	5.03497e-06	-0.0496415	0.111913
CFAP70	0.753768	0.0767219	0.0953648	2.69257e-24	0.135635	1.31366e-06
ABL2	-0.156144	-0.0768843	0.110259	4.474e-32	-0.174069	2.94608e-10
C1orf54	-0.0104445	-0.0769084	-0.175918	2.79761e-80	-0.147527	1.21225e-07
CCDC144A	-0.17107	0.0769873	0.0976867	1.95958e-25	0.0521239	0.0933344
SRGAP1	-3.255	0.0771982	0.0398625	3.42196e-05	0.0491531	0.115781
CD68	0.00194024	0.0774535	-0.296451	3.55682e-232	-0.0333769	0.309394
MAOA	-0.846684	-0.077499	-0.0919245	1.16998e-22	-0.0579307	0.0583571																	x
DHRS2	-0.881776	-0.0778531	0.00178409	0.875471	-0.0370393	0.253501															x	x
TMEM176B	-0.0263838	0.0779044	-0.0921034	9.66743e-23	-0.0182366	0.609835																													x
RASSF2	-1.04415	-0.0779347	-0.0634002	2.1175e-11	-0.0696918	0.019741
MT-CO2	-0.0945618	-0.078298	-0.409473	0	-0.228233	4.94651e-17
ABCC3	-1.81525	-0.078381	-0.32037	4.22962e-273	-0.145396	1.88497e-07
GAREM1	4.9453	-0.0789551	0.0754508	1.17802e-15	-0.0826327	0.00477645
GPR146	-1.45543	0.0793923	-0.0109804	0.297452	0.0255922	0.454535
CDR2	-0.966487	0.0794039	-0.00161012	0.886942	-0.0658842	0.0287422																					x
RPL10	-0.522417	-0.0795061	-0.379469	0	-0.224919	1.45879e-16
2021-09-04	4.04572	0.0796593	0.046013	1.49527e-06	0.0597506	0.0501046
IGFBP4	4.0702	-0.0798339	0.267085	4.55679e-187	-0.0321982	0.329517														x	x	x
SIGLEC1	3.26574	-0.0798729	0.378682	0	-0.187151	9.93341e-12
CASS4	-0.0214005	-0.079968	-0.0220175	0.0274685	-0.0823903	0.00491815
FCGR1A	3.4181	-0.0799981	-0.156394	1.52766e-63	-0.146386	1.53802e-07																											x
SLC1A3	2.28827	-0.0801197	-0.180303	2.53188e-84	-0.082085	0.00509542
MSMO1	-0.367054	-0.0802431	-0.249178	3.2052e-162	-0.158849	1.05035e-08
CYBRD1	-0.785886	0.0804804	0.107302	1.91723e-30	0.0678175	0.0237967
GBP4	5.91159	-0.0805697	0.230216	5.07968e-138	-0.130264	3.61775e-06																							x			x	x
NKX3-1	4.32544	0.0807761	0.0196576	0.0509472	0.136974	1.02192e-06			x
MYO1G	1.2112	-0.0814401	0.212563	2.09565e-117	-0.0334609	0.308013
PSTPIP2	0.574461	-0.0815616	-0.014271	0.167352	-0.136537	1.10874e-06
RPS14	-0.343653	-0.081748	-0.452887	0	-0.230206	2.63688e-17
ZNF292	-0.169387	0.0819701	-0.0263822	0.00739131	-0.105294	0.00023602																			x			x
IL10	-1.27386	-0.0820328	0.149395	4.85866e-58	-0.101432	0.000410694		x																					x		x
LPIN2	0.862643	-0.0820448	-0.169708	9.92607e-75	-0.168247	1.21119e-09																					x
HLA-B	0.300813	-0.0820557	-0.407087	0	-0.188315	7.30524e-12																											x
CHEK2	0.0787486	0.08206	0.0115816	0.269804	-0.0252421	0.460551													x
FRMD4B	-0.816998	-0.0820819	-0.0242019	0.014607	-0.117036	3.64939e-05
ICAM1	1.55883	-0.0821114	0.105436	1.96444e-29	-0.247191	7.65497e-20		x			x																				x		x
DOCK4	0.937982	-0.0821499	0.131205	5.65082e-45	-0.0675071	0.0245711											x																			x
TTC39B	1.35159	-0.0823155	-0.159042	1.09166e-65	-0.12809	5.35912e-06																							x
CXXC5	-3.2163	-0.082356	-0.171212	4.69519e-76	-0.124073	1.1059e-05
DNAJB9	-0.26158	0.0831286	0.0424751	9.58586e-06	-0.0475843	0.128574	x		x
ARID1A	-0.969965	-0.0835749	0.00286479	0.799336	-0.114303	5.72426e-05
ANKRD22	3.26159	-0.0838175	-0.0475946	6.22751e-07	-0.123923	1.13575e-05
FSCN1	0.395299	0.0838743	-0.105613	1.58203e-29	0.0488154	0.118249					x																									x
ATP6V0A1	-0.783641	-0.0839238	-0.0544292	1.02799e-08	-0.207436	3.2947e-14																					x
CFP	0.196136	0.0839419	0.0917188	1.45726e-22	0.0680919	0.0231516		x																													x
G6PD	-0.40559	-0.0840506	-0.369789	0	-0.132	2.62739e-06																			x												x											x
SERPINF1	0.253497	0.0841651	0.245655	1.46323e-157	0.114166	5.85381e-05
KIF23	2.16071	-0.0842694	0.08047	1.20919e-17	-0.139139	6.71939e-07																		x												x
ARL5B	2.41847	-0.0845008	0.155859	4.11316e-63	-0.0625675	0.0388494
CLEC4G	-0.454551	-0.0845033	-0.0302068	0.00198316	-0.0131499	0.722855
GCLC	0.701318	0.0848323	0.0854033	1.01357e-19	-0.0140348	0.703701																			x		x										x											x
HEXB	-0.164365	0.0849278	-0.355461	0	-0.0925614	0.00138242
PPP1R14A	-0.768313	-0.0853536	-0.0992916	3.08304e-26	-0.044505	0.159136
PHACTR1	-0.614824	0.0856868	0.0822014	2.3283e-18	-0.10959	0.000121887
UCP2	-0.911775	0.0864201	-0.152507	1.86925e-60	-0.0289991	0.386748	x																				x
FDXR	-0.504155	0.086556	-0.120535	4.04749e-38	0.0392947	0.222148							x	x																							x						x
VCAN	3.53279	-0.0865905	0.0241347	0.0148939	-0.102377	0.000359121				x	x									x					x
HAPLN3	5.07388	0.0866107	0.0414306	1.60833e-05	-0.0882159	0.00242342
RAB30	-0.395841	-0.086675	-0.0570703	1.82198e-09	-0.0671901	0.0253471
RPS12	-0.179796	0.0868022	-0.393977	0	-0.246524	9.70167e-20																																					x
TUBA1C	-0.649486	-0.0871027	-0.271046	7.80422e-193	-0.157017	1.55594e-08
HERC6	4.53778	0.0871553	0.211086	9.21861e-116	-0.0388518	0.228474																										x	x
MIF	-0.0152405	-0.0871961	-0.0337124	0.000512648	-0.166316	1.87673e-09																	x		x			x
SLC18B1	3.32871	-0.0872609	0.0850202	1.48768e-19	-0.0360407	0.268869
SPOCD1	0.648408	-0.0872712	-0.26478	9.29478e-184	-0.13774	8.80243e-07
CHI3L1	0.689337	-0.0872945	-0.263736	2.8631e-182	-0.131383	2.94538e-06
RFLNB	-0.569238	0.0873162	-0.0587097	6.00822e-10	0.123301	1.2691e-05
XBP1	0.216065	0.0876249	-0.049356	2.27115e-07	-0.131447	2.91279e-06															x	x							x								x
ZC3H12A	0.779337	-0.0878509	-0.0707997	6.34205e-14	-0.119873	2.25824e-05
RGS2	0.222128	0.0882681	0.0529874	2.55157e-08	0.121571	1.71058e-05
HEATR9	2.98563	0.0882765	0.0630313	2.78258e-11	0.104926	0.000248596
FHOD1	-2.47909	-0.0882805	-0.138992	2.34574e-50	-0.0652321	0.0305577
TCF7L2	1.92878	-0.0883219	-0.130644	1.33918e-44	-0.0706156	0.0179226																																			x
LDHB	-0.522471	0.0885393	-0.237965	1.17699e-147	-0.0966279	0.000800647																																				x	x
SEMA4A	1.34172	-0.0887519	0.227882	3.42833e-135	-0.056116	0.06791
FCER2	-0.222958	-0.0889113	-0.434977	0	-0.175014	2.32063e-10
BLOC1S6	-1.39131	-0.0891188	-0.16179	5.87418e-68	-0.156691	1.66962e-08
HOMER2	-1.07846	-0.0892218	0.0650897	5.96394e-12	-0.0512054	0.100061			x													x
KCTD12	-1.6335	-0.0895521	0.0391179	4.84449e-05	0.0305186	0.35853
RAB29	1.05959	-0.089692	-0.0708812	5.92873e-14	-0.157739	1.33365e-08
ZBTB20	-0.18196	0.0897795	0.139815	6.12629e-51	0.0509404	0.102194
IRF8	1.86866	-0.0904052	-0.0589368	5.14634e-10	-0.172469	4.36936e-10		x																					x				x		x
MAN1C1	-0.990246	-0.0906744	0.0594392	3.63987e-10	-0.0579673	0.0581933
ACTN2	4.11608	0.0907295	0.156654	9.45083e-64	0.0730703	0.0138534					x						x																							x
AP1S2	0.39265	-0.0907467	-0.124255	1.92655e-40	-0.106934	0.000183596
AIG1	-0.214156	0.0910682	0.140859	1.09044e-51	0.0894693	0.00206707
ANKRD28	-0.318837	0.0914178	0.0181289	0.0736484	0.0145992	0.691315
CCNB1	0.642026	0.0914207	0.0401585	2.97276e-05	0.0646524	0.0321429
PTX3	2.75287	0.0917863	0.134052	6.68548e-47	0.0241313	0.484126														x
SOBP	0.819735	-0.0919262	-0.119531	1.66022e-37	-0.0952115	0.00097173
PEAK1	0.949166	0.0923821	0.228991	1.56422e-136	0.0400781	0.211686
RHPN1	0.807361	-0.0927487	0.139754	6.75887e-51	-0.0622894	0.0398419
GIMAP8	1.58189	-0.0929242	0.182836	1.04684e-86	-0.0810088	0.0057485
TNFRSF9	3.63665	0.0933323	0.112532	2.29897e-33	-0.0145654	0.692069																							x		x
SGPP2	2.94681	0.0934413	-0.0341816	0.000422382	-0.110245	0.000110002
NPR1	0.449507	-0.0934655	-0.173871	1.98158e-78	-0.0810706	0.00571375
NFIL3	-0.966421	-0.0936425	-0.0564731	2.7131e-09	-0.0782757	0.00787695									x													x	x								x
ANXA2R	2.08891	-0.0939098	-0.0836894	5.50196e-19	-0.0394911	0.219489
EGLN3	-0.268242	-0.0940851	-0.0727503	1.22573e-14	-0.0700086	0.0190889																			x												x
RPS13	-0.316085	-0.0941635	-0.43029	0	-0.279581	2.58537e-25
CDA	-0.858923	-0.0946611	-0.329251	2.77894e-289	-0.192571	2.3088e-12											x	x
PUM2	-0.264328	0.0953536	0.0729276	1.05516e-14	-0.0216165	0.536385
TRIM47	-1.25101	-0.0953833	-0.0799683	1.93655e-17	-0.100167	0.000490454
JUN	-0.715935	-0.0954344	-0.130008	3.54173e-44	0.0330641	0.314167							x							x								x		x													x
SLC2A6	0.791021	-0.0954865	-0.0391731	4.72167e-05	-0.243956	2.41269e-19
RPL37A	-0.317781	-0.0955233	-0.43732	0	-0.343472	1.71449e-38
GPBAR1	2.40094	-0.0955665	0.173621	3.32361e-78	-0.0725864	0.0145528
ADAM19	0.905809	-0.0958464	0.107535	1.43392e-30	-0.0726769	0.0144253																							x
SKIL	1.2034	0.0959472	0.0520216	4.62787e-08	-0.176527	1.58748e-10																												x
CYP27A1	-0.394025	-0.0966687	-0.346513	2.17388884170148e-322	-0.12785	5.57229e-06								x
NFKBID	-0.240304	-0.0967016	-0.104611	5.40702e-29	-0.035684	0.274477
CCND2	-0.392291	-0.0967183	-0.366449	0	-0.192741	2.20547e-12		x		x			x																x						x								x
GIMAP1	-0.0522469	-0.0967602	0.0543302	1.09454e-08	-0.0708875	0.0174658
ACTA2	1.00189	0.097078	-0.1389	2.72401e-50	-0.0750817	0.0112302														x
EZH2	0.567569	0.0970929	-0.0123227	0.239096	0.00961055	0.801817													x					x																									x
POLG2	-1.42302	0.0972908	-0.0251962	0.0108133	0.207402	3.30693e-14
MPP1	-0.252241	0.0973799	0.0762218	5.95566e-16	0.0552713	0.0728521																					x
PDLIM4	-0.104201	-0.0977413	-0.192778	2.04771e-96	-0.146308	1.56159e-07														x
EPHX1	0.0146912	0.0980128	-0.00382821	0.733444	0.0231295	0.503743																	x																				x
RPS16	-0.285892	-0.0981091	-0.445346	0	-0.318099	6.79649e-33
ALDH2	-0.0894339	-0.0981498	-0.298606	1.04525e-235	-0.197621	5.68764e-13	x
LPP	-0.421747	-0.0981874	-0.111087	1.52533e-32	-0.18257	3.3777e-11
DGKH	-0.012948	-0.0986019	-0.0244726	0.0134837	-0.139115	6.74236e-07											x
BAMBI	3.28718	0.0986774	0.0384024	6.74166e-05	0.134729	1.55169e-06
TMPRSS13	3.05208	0.0988127	0.12993	3.98265e-44	-0.0157021	0.664143
S100A4	-0.198022	-0.0988322	-0.104549	5.82486e-29	-0.111556	8.86956e-05				x																		x															x
PSTPIP1	-1.76475	-0.0989173	-0.213951	5.84152e-119	-0.132729	2.28539e-06
AP2A2	-1.14051	-0.0994608	0.168733	7.06136e-74	-0.0534895	0.083945
RAB5A	0.940346	0.0996524	0.0593189	3.95928e-10	-0.0443046	0.161286																																									x
ARID1B	-0.865347	-0.0996675	-0.020132	0.0452769	-0.0857045	0.00328768
SYTL1	-0.863928	-0.0998047	-0.276924	1.43934e-201	-0.166841	1.66867e-09
HCAR3	1.98411	-0.0998465	-0.0303585	0.00187443	-0.142384	3.5069e-07
CD81	0.0367216	-0.100389	-0.499719	0	-0.209732	1.62962e-14																							x														x
CLEC4E	2.56116	-0.100768	-0.0317868	0.00109496	-0.204299	8.37851e-14
LIPA	-0.33504	-0.101027	-0.411538	0	-0.12012	2.17091e-05											x
CDC42EP1	0.72222	-0.101054	0.0282916	0.00390467	-0.0351311	0.282574																														x
MITF	-0.6982	0.101259	-0.0347916	0.000328458	-0.0539815	0.0807234
HIST1H2BG	0.237533	0.101988	0.123762	3.92835e-40	-0.0923726	0.00141844
ANKRD37	0.270943	-0.102038	-0.0798306	2.20269e-17	-0.103186	0.000319778
FTH1	-0.052774	0.102042	-0.224417	4.76361e-131	-0.218917	9.54569e-16
TRPS1	-0.773559	-0.102065	0.05682	2.15224e-09	-0.104905	0.000249123
MCTP1	1.13156	0.102288	0.139311	1.39462e-50	-0.0292226	0.383042
RCBTB2	-0.114285	-0.102297	0.161455	1.11228e-67	-0.0584677	0.0558101
CD200R1	-2.11744	-0.102623	-0.019925	0.0477237	-0.12618	7.58749e-06
GBP2	2.42666	-0.1028	-0.130104	3.05921e-44	-0.20057	2.43056e-13		x																								x
AMOTL2	5.51692	-0.10293	0.196474	3.60163e-100	-0.044245	0.161762
EPS8	1.16874	0.103087	-0.0623038	4.75082e-11	0.0435018	0.16993
GPAT3	-1.07982	-0.10347	-0.192031	1.14866e-95	-0.0810757	0.00571375
STAP1	6.27524	-0.103836	0.242955	4.85339e-154	-0.0765829	0.00950801
S100A8	0.151411	-0.103842	-0.246381	1.62436e-158	-0.151421	5.31293e-08
S100A13	0.105832	0.103991	-0.0877736	9.16747e-21	-0.0705583	0.0179959										x	x
SGK1	-1.66	-0.10406	-0.182484	2.24755e-86	-0.170247	7.4628e-10			x													x												x
FURIN	-1.12792	-0.104087	-0.147871	7.03553e-57	-0.0954625	0.000939954										x													x
NRIP3	1.62488	0.104257	-0.0794228	3.21578e-17	-0.0190513	0.591683
KCNJ2	0.850976	-0.104415	0.258949	1.58921e-175	-0.0986631	0.00060465																									x
FPR2	3.19761	-0.10442	-0.0977086	1.91288e-25	-0.200898	2.20952e-13
TNFSF9	2.79237	0.104584	0.0652998	5.08314e-12	0.020202	0.566318																									x												x
FFAR4	-1.79372	-0.104752	-0.20595	3.85614e-110	-0.0870657	0.00280298
SCPEP1	0.666948	-0.104903	-0.143332	1.73181e-53	-0.124671	9.90854e-06
OCIAD2	2.20218	0.104967	0.0366995	0.000145033	0.0850175	0.00357888
FADS1	-1.26031	-0.105115	-0.333067	2.07388e-296	-0.121462	1.73813e-05			x					x																							x								x
MLLT3	2.42919	0.105184	0.0761219	6.5039e-16	-0.0318557	0.335275
FRMD4A	-1.85787	-0.105195	-0.143852	7.16669e-54	-0.118035	3.08682e-05
ATM	-0.683585	-0.105233	0.0356736	0.000226726	-0.157815	1.31244e-08
HIVEP3	-1.09177	0.105269	0.0185861	0.0661188	-0.0437113	0.167479
DUSP2	0.729369	0.105663	0.101625	1.97997e-27	0.0248555	0.46884																x																	x
MYH9	-0.671167	-0.106324	-0.28009	2.2776e-206	-0.123376	1.25321e-05					x															x		x								x				x
HELLS	1.06077	0.106537	0.0347258	0.000337435	0.157132	1.52041e-08													x
DCUN1D3	-0.476096	-0.107214	0.049339	2.29251e-07	-0.152031	4.64635e-08
LRRC8C	-1.10159	-0.107233	-0.057868	1.06832e-09	-0.131049	3.12646e-06																							x
SDC2	-0.8461	0.108035	-0.172353	4.53965e-77	-0.0121908	0.741856																			x			x
RRAGD	-0.81257	0.108303	-0.22075	9.64487e-127	-0.0717023	0.0159943																			x			x	x
ATP2B1	-2.05782	-0.108446	-0.0251642	0.0109145	0.0228304	0.510697																									x
CD226	0.113183	-0.108804	-0.0954775	2.37475e-24	-0.0949971	0.00099967
TAGLN	1.24538	-0.108807	0.101771	1.66464e-27	-0.0165731	0.645241														x																				x
QSOX1	-0.393408	0.108922	-0.280394	7.86909e-207	-0.0891777	0.00214528														x					x
HES4	4.85885	0.109065	0.0323832	0.000868794	-0.0434406	0.170348
KCNK6	-2.47071	-0.109324	-0.258169	1.92508e-174	-0.228544	4.48522e-17
RAPGEF1	-0.176612	-0.109544	-0.0482392	4.32248e-07	-0.157646	1.36041e-08
APOBEC3B	5.63129	-0.109616	0.153674	2.25989e-61	-0.0716191	0.0161332
BATF	0.181531	0.109723	-0.0383666	6.84703e-05	-0.0898686	0.00196584																x							x
ENTPD1	-1.39955	-0.110337	-0.213191	4.15629e-118	-0.141649	4.06408e-07
ZBTB8OS	-0.292504	0.110338	-0.167291	1.2634e-72	-0.106416	0.000198833
RAB7B	-0.558281	0.110839	-0.0410067	1.9788e-05	-0.0969105	0.000771119
CSF1	1.70902	-0.110873	-0.184839	1.28051e-88	-0.14979	7.5123e-08		x																					x	x	x	x
KIAA1671	2.09465	-0.110946	-0.0706488	7.18177e-14	-0.129534	4.13329e-06
HSPA2	2.24781	0.111425	0.0602008	2.13894e-10	0.111841	8.49518e-05																																											x
CD1E	-0.868399	-0.111462	-0.245515	2.22475e-157	-0.123214	1.28785e-05
SLC38A5	5.81715	-0.111505	0.127446	1.719e-42	-0.0674893	0.0245996
MKNK1	-0.597234	-0.111551	0.0412075	1.79379e-05	-0.104969	0.00024717																																								x
MRAS	-0.555922	-0.111963	-0.283083	5.82271e-211	-0.168211	1.21917e-09																																		x
SRI	0.173286	-0.112024	-0.0278186	0.00459043	-0.217469	1.50542e-15																									x		x
CAMK2D	0.638716	-0.112041	-0.0387557	5.72366e-05	-0.118152	3.02741e-05
CXCL16	0.0356049	-0.112068	-0.328778	2.07792e-288	-0.135572	1.32846e-06									x
LPL	-0.0388787	0.112401	-0.22716	2.53791e-134	-0.0526615	0.0893442	x			x					x
RHOC	0.0123672	-0.11246	-0.185312	4.4816e-89	-0.0543429	0.0784275
LIG1	0.62249	0.112495	-0.00423703	0.704437	-0.045159	0.152441												x	x
HIPK2	-0.20163	-0.112584	-0.249162	3.35699e-162	-0.121914	1.61735e-05																							x
ECM1	-0.119851	0.112627	-0.10902	2.2e-31	-0.0179252	0.61563														x									x
PRDM1	-0.17844	-0.112629	0.0925932	5.70275e-23	-0.167153	1.55682e-09																													x
BLVRB	-0.660964	0.112656	-0.0268613	0.00632384	0.0153764	0.672903															x	x					x
CD80	2.70023	-0.112979	0.0911892	2.56029e-22	-0.142149	3.68021e-07		x																										x
IRF4	-0.726132	-0.11329	-0.117373	3.33207e-36	-0.0187855	0.597879		x																					x				x
ARHGAP22	-0.823049	-0.11368	-0.176133	1.77887e-80	-0.0901558	0.00189305
LGALS1	-0.220532	0.113734	-0.0898782	1.02715e-21	-0.0736397	0.0130229														x			x
NCEH1	0.614118	-0.114054	-0.256959	9.08964e-173	-0.197288	6.25605e-13
ORAI1	-0.6169	-0.114408	-0.154444	5.52445e-62	-0.225419	1.24811e-16
SLC35E3	-1.60169	0.114414	-0.0771731	2.53153e-16	-0.0344111	0.293623
ISG20	5.84943	-0.114864	0.129191	1.22888e-43	-0.166987	1.61278e-09							x									x			x			x				x	x
MAP3K8	-0.405749	-0.115176	-0.0245109	0.0133279	-0.152773	3.97521e-08																							x	x
PLK2	1.4238	0.115912	0.0136903	0.186828	0.0770462	0.00903776																																					x
GSAP	0.0228834	-0.116319	-0.00808921	0.451997	-0.171927	4.9638e-10
ZNF503	0.695627	0.116526	0.0332421	0.000621019	0.104332	0.000270375
IL32	2.7745	0.117004	0.137069	5.37011e-49	0.0283453	0.398904														x
LILRB5	0.710874	0.117403	0.195077	9.66147e-99	0.0650943	0.0309336
REL	-0.123615	-0.11746	-0.179737	8.49104e-84	-0.201806	1.71282e-13
P2RY14	1.08417	-0.117555	-0.0121511	0.245712	-0.152236	4.4665e-08																											x
CCSAP	-0.939989	-0.117649	0.0132514	0.202604	-0.156978	1.5674e-08
INSIG1	0.0196395	-0.11787	-0.111807	5.94264e-33	-0.191298	3.28783e-12			x		x																										x
ORAI2	0.428777	0.118029	0.0219494	0.0279883	0.114903	5.21293e-05
TNS3	0.183667	-0.118281	-0.127831	9.6473e-43	-0.18639	1.22144e-11
FABP3	-0.255943	0.118357	-0.00719834	0.508687	-0.00547332	0.887982																																		x
CCL20	4.56794	0.11901	0.028982	0.00306495	0.0129703	0.726462																									x				x
UNC5C	5.57247	0.119174	0.165361	5.69609e-71	0.0294083	0.379495																				x
GATM	-0.297697	0.11951	0.184768	1.49532e-88	0.0587868	0.0542321
IRS2	-1.79839	0.119689	-0.00356244	0.7497	0.102584	0.0003489																			x			x
LILRA2	-0.38798	-0.119773	-0.349638	0	-0.127564	5.86158e-06
TAF9	-0.107523	0.120116	-0.0793147	3.55507e-17	-0.0932291	0.0012697												x
RASSF5	-0.712217	-0.120281	-0.0822844	2.15242e-18	-0.102759	0.000339927
HLA-DMB	-0.685073	-0.120537	-0.0113333	0.280884	-0.055355	0.0723879		x
IFITM1	5.54232	-0.12056	0.0975676	2.23772e-25	-0.108877	0.000135955																									x	x
CD14	-0.176974	-0.120612	-0.135276	9.54911e-48	-0.105453	0.000230387							x																	x	x
MFSD2A	1.36571	0.12079	-0.0828311	1.26903e-18	-0.0232069	0.502334
IQGAP2	-0.0472667	-0.120797	0.00364806	0.745286	-0.0931795	0.00127622			x
ZFYVE16	-1.58752	-0.120839	-0.157878	9.71315e-65	-0.178224	1.04636e-10
ICOSLG	-1.0398	-0.120921	0.00311612	0.780782	-0.126855	6.69739e-06		x																							x
PPP1R9B	-1.54572	-0.121084	0.000600541	0.95913	-0.0827886	0.00469025
LGALS3	-0.148077	0.121407	-0.356814	0	-0.113283	6.74261e-05							x		x		x
UBE2E1	0.766049	0.12142	0.0658763	3.25138e-12	0.0689197	0.0212972																																x
HARS	0.347397	0.121524	-0.0198959	0.0480392	0.00167143	0.965705
HCAR2	3.11052	-0.121724	-0.0610193	1.20122e-10	-0.119007	2.62677e-05
CTSZ	-0.110919	-0.122179	-0.249191	3.09422e-162	-0.115323	4.8594e-05																							x
HLA-DPA1	-0.174001	-0.122375	-0.258195	1.77798e-174	-0.17692	1.44174e-10
TFRC	-0.347734	-0.122772	-0.393405	0	-0.159932	8.23682e-09													x								x										x
RIPK1	1.86906	0.122788	0.0442932	3.75138e-06	0.0567851	0.0641739																											x													x
TUBB	-0.551514	-0.122886	-0.339607	0	-0.157449	1.41693e-08													x
FCGR2B	-0.0246735	-0.123047	-0.101895	1.43575e-27	-0.14072	4.90187e-07		x
CD86	0.382307	-0.123334	-0.197059	9.03174e-101	-0.0952063	0.00097173		x			x																		x				x
CD83	1.43908	-0.123379	-0.179721	8.77571e-84	-0.181007	5.03025e-11																							x
H1FX	-1.53568	0.123681	-0.139133	1.86375e-50	0.00532759	0.891268
MGLL	-0.545124	0.12384	-0.0668123	1.56816e-12	0.000818268	0.982159	x																x
HMGA1	-0.296227	-0.124214	-0.366958	0	-0.170518	7.01381e-10													x					x
IGF2BP3	5.21562	-0.124462	0.104455	6.53313e-29	-0.117323	3.4786e-05
WDFY4	-0.850253	-0.12457	-0.164268	4.85506e-70	-0.135344	1.38101e-06
LILRB2	0.911652	-0.124832	0.178698	7.77554e-83	-0.0471962	0.132188
C15orf48	2.40291	-0.124864	-0.275017	1.03833e-198	-0.235582	4.15933e-18
SLC38A2	-0.741078	-0.12499	-0.0774995	1.88335e-16	-0.0641127	0.0337874			x
FAM26F	3.45757	0.125203	0.327419	6.66777e-286	-0.0174829	0.625823
PPARGC1B	-2.2281	-0.125278	-0.166766	3.56202e-72	-0.11655	3.95423e-05
LAMP3	3.24834	-0.126149	-0.0997865	1.73107e-26	-0.167247	1.53322e-09																									x	x
CXCL3	1.36858	0.126229	0.112261	3.2718e-33	0.0979198	0.000672859																								x
CLEC4D	2.46923	-0.126284	-0.0499425	1.61378e-07	-0.207411	3.30693e-14
CLEC12A	-0.079462	-0.126448	-0.219778	1.29407e-125	-0.210377	1.34857e-14
ANKRD12	-0.2446	-0.126495	0.0989265	4.6968e-26	-0.239115	1.29017e-18
TIFAB	1.09824	-0.126687	0.133314	2.13611e-46	-0.132078	2.59119e-06
CKS2	0.065077	0.126796	-0.00176412	0.876298	0.0150597	0.679769													x					x
ANGPT2	1.04583	0.127565	0.0158789	0.121825	0.0873594	0.00270213
CCL22	-0.150416	-0.127993	-0.423121	0	-0.181337	4.6474e-11		x																							x
KCNMA1	0.283173	-0.128094	-0.0818334	3.30806e-18	-0.120622	1.99314e-05
S100A10	-0.0491386	-0.128116	-0.149021	9.39542e-58	-0.178158	1.06233e-10																	x																				x
KCNE1	-0.658487	-0.128255	-0.187788	1.76948e-91	-0.229886	2.90269e-17
LIMA1	0.20726	0.128403	-0.182572	1.86348e-86	-0.173308	3.56132e-10					x
KCNN4	-1.04393	-0.128882	-0.259044	1.17591e-175	-0.187174	9.89452e-12																													x
SESN3	-1.28459	0.129204	0.029683	0.00239082	0.0468994	0.135033
FAM217B	-0.654995	0.129279	0.0427379	8.40491e-06	-0.0799911	0.00647889
MFHAS1	-0.610183	-0.129326	-0.224032	1.35462e-130	-0.151689	5.01088e-08																					x
TNIK	1.60817	-0.130008	-0.166911	2.67639e-72	-0.168424	1.16334e-09
ARHGEF10L	0.532402	-0.13007	0.139885	5.4778e-51	-0.199971	2.88088e-13
LCP2	1.12592	-0.130223	0.239666	8.09045e-150	-0.19554	1.02635e-12		x									x														x		x
FCGR2A	0.235247	0.130291	0.181154	4.04441e-85	-0.046023	0.143521
CLDN23	0.636261	-0.130556	-0.161498	1.02804e-67	-0.201308	1.97782e-13
CYBA	-0.127869	-0.130686	-0.506114	0	-0.225565	1.1929e-16
STAT5A	0.26315	-0.131434	0.127437	1.73914e-42	-0.10615	0.000206823	x
HLA-DQB1	0.0188878	-0.131926	-0.143562	1.17264e-53	-0.148857	9.1486e-08
RASAL2	-1.41787	-0.13198	-0.292788	3.04618e-226	-0.121975	1.60167e-05																		x												x
RHEBL1	4.06382	0.132262	0.159939	1.99621e-66	-0.0594378	0.0513009
NUCB2	0.401491	0.133034	-0.005671	0.606933	-0.020298	0.564322
BEX4	-0.541613	0.133063	-0.00592382	0.59048	0.0310027	0.350423
IPCEF1	-1.32697	-0.13317	0.123947	3.00463e-40	-0.152204	4.49155e-08																																										x
FAM43A	-0.0437617	0.133271	0.0620989	5.5171e-11	0.0737259	0.0129036
FAM105A	-1.66769	-0.133439	-0.0485629	3.59463e-07	-0.119709	2.32278e-05
FZD4	3.57754	0.134066	0.123972	2.89714e-40	0.0853546	0.00343608	x
KIAA1551	-0.43169	-0.134229	0.0582555	8.20709e-10	-0.089845	0.00197039
TSPAN33	-0.349571	-0.13433	-0.100874	4.82533e-27	-0.0583837	0.0561475
PDCD1LG2	0.972229	-0.134765	0.223381	7.94434e-130	-0.0659529	0.0285764																													x
TBL1X	-1.06819	-0.134832	0.0450099	2.56966e-06	-0.0754645	0.010774
OTUD1	0.459364	0.134894	0.0109933	0.296888	0.0115886	0.754702
KAT6B	-0.692364	0.135083	0.0603177	1.97358e-10	-0.0143191	0.69737
EGR2	-2.02436	-0.135332	-0.186638	2.33298e-90	-0.236422	3.1139e-18
EIF3L	-0.800064	-0.135383	-0.366194	0	-0.221762	3.91851e-16
CREM	1.08578	0.135736	0.1548	2.8801e-62	-0.00443384	0.907543
FNBP4	0.279946	0.135795	0.0147324	0.153624	-0.0385621	0.232253
CTTNBP2	-0.802535	-0.135867	0.050919	9.0354e-08	-0.0281658	0.402704
SASH1	1.25045	-0.135985	0.151081	2.42106e-59	-0.0323889	0.326662
FTL	-0.228562	0.136006	-0.097586	2.19567e-25	-0.21245	7.19202e-15																																										x
CTSL	0.418032	0.136022	-0.109309	1.52384e-31	0.013629	0.71236											x
EFNB2	2.56633	0.136389	0.0315384	0.0012027	0.194701	1.28746e-12
MS4A6A	-0.0643243	-0.136624	0.323953	1.45887e-279	0.0448712	0.155324
AIM2	4.07645	-0.136637	-0.102851	4.5679e-28	-0.122432	1.47895e-05
[truncated: 692 more rows]
[truncated: 7 more columns]
